# Supplementary material for: Visible-light photocatalyzed C–N bond activation of tertiary amines: a three-component approach to synthesize quinazolines
Source: Royal Society of Chemistry journal article supplement (doi:10.1039/d3ob02067c), 2024-01-01
Supplement: d3ob02067c1.pdf [file d3ob02067c1.pdf]

## Supporting Information

# Visible-Light Photocatalyzed C-N Bond Activation of Tertiary Amines: A Three-Component Approach to Synthesize Quinazolines

Ajithkumar Arumugam, Gopal Chandru Senadi\*

*Department of Chemistry, College of Engineering and Technology, SRM Institute of Science and Technology, SRM Nagar, Kattankulathur - 603 203, Chengalpattu District, Tamil Nadu.*

**Email:** [chandrug@srmist.edu.in](mailto:chandrug@srmist.edu.in)

| <b>S. No.</b> | <b>Table of Contents</b>                   | <b>Page No.</b> |
|---------------|--------------------------------------------|-----------------|
| 1             | General Information                        | 03              |
| 2             | Complete Optimization Studies              | 03              |
| 3             | Experimental Section                       | 06              |
| 4             | TLC & Experimental Setup for <b>3aa</b>    | 08              |
| 5             | GC-MS Studies for <b>3aa</b>               | 09              |
| 6             | Cyclic-voltammetry Data                    | 10              |
| 7             | Spectral Characterization                  | 11              |
| 8             | References                                 | 17              |
| 9             | Copies of $^1\text{H}$ and $^{13}\text{C}$ | 19              |

## (1) General Information

A Bruker 500 MHz and 400 MHz were used to record  $^1\text{H}$  NMR spectra, and a Bruker 125.8 MHz/100.61 MHz was used to record  $^{13}\text{C}$  NMR spectra. Parts per million (ppm) is used to express the chemical shift ( $\delta$ ) values, whereas hertz (Hz) is used to express the coupling constants (J). The spectra were recorded using  $\text{CDCl}_3$  solvent.  $^1\text{H}$  NMR chemical shifts are referenced to tetramethylsilane (TMS, 0 ppm) and  $^{13}\text{C}$  NMR is referenced to  $\text{CDCl}_3$  (77.16 ppm). HRMS was recorded with QTOF-ESI source M/S Bruker Daltonik GmbH, Germany. Cyclic voltammetry measurements were carried out with Multi Autolab M204 (Serial number: MAC90963). The progress of the reaction was monitored by TLC using Merck pre-coated TLC sheets. The Melting points of compounds were determined using a digital melting point apparatus (Model 935) from Deep Vision Electronics PVT. LTD. IP66 50 W Blue LED light used for irradiation of the reaction mixture from VistaRa fine lighting, China. Column chromatography was performed on 100-120 mesh silica gel using hexane/ethyl acetate as eluent and solvents were used without further distillation. All commercial chemicals were purchased from Sigma-Aldrich, Avra, Alfa Aesar, SRL Spectrochem and Carbanio. Compounds **1b-f**, **1m**, **1n**, **1o** were prepared according to the previously reported literatures<sup>1-4</sup> and **1a**, **1g** – **1l**, **1p** were purchased commercially.

## (2) Complete Optimization Studies

Table S1. Photocatalyst Screening<sup>a</sup>

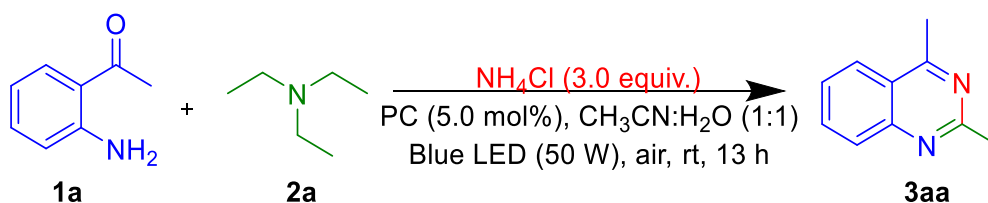

| S.No     | Photocatalyst                        | Yield (%) <sup>b</sup> |
|----------|--------------------------------------|------------------------|
| 1        | Rose bengal                          | 71                     |
| 2        | Riboflavin                           | 54                     |
| 3        | $\text{Ru}(\text{bpy})_3\text{Cl}_2$ | 48                     |
| 4        | EY- $\text{Na}_2$                    | 83                     |
| <b>5</b> | <b>Eosin Y</b>                       | <b>98</b>              |
| 6        | Fluorescein                          | 18                     |
| 7        | Methylene blue                       | 14                     |
| 8        | 4-CzIPN                              | trace                  |
| 9        | Without Photocatalyst                | 0                      |

<sup>a</sup>All reactions were carried out using 0.5 mmol of **1a** and 2.5 mmol of **2a**. <sup>b</sup>Isolated yield.

**Table S2. Solvent Screening<sup>a</sup>**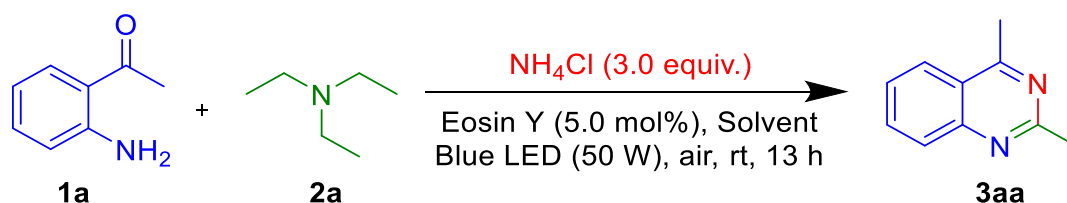

| S.No     | Solvent                                | Yield (%) <sup>b</sup> |
|----------|----------------------------------------|------------------------|
| 1        | EtOAc:H <sub>2</sub> O                 | 55                     |
| 2        | Butanol:H <sub>2</sub> O               | 78                     |
| 3        | DMF:H <sub>2</sub> O                   | 19                     |
| 4        | DMSO:H <sub>2</sub> O                  | 09                     |
| 5        | Dioxane:H <sub>2</sub> O               | 24                     |
| 6        | DMA:H <sub>2</sub> O                   | 26                     |
| 7        | THF:H <sub>2</sub> O                   | 49                     |
| <b>8</b> | <b>CH<sub>3</sub>CN:H<sub>2</sub>O</b> | <b>98</b>              |
| 9        | CH <sub>3</sub> CN                     | 14                     |

<sup>a</sup>All reactions were carried out using 0.5 mmol of **1a** and 2.5 mmol of **2a**. <sup>b</sup>Isolated yield.

**Table S3. Nitrogen Source Screening<sup>a</sup>**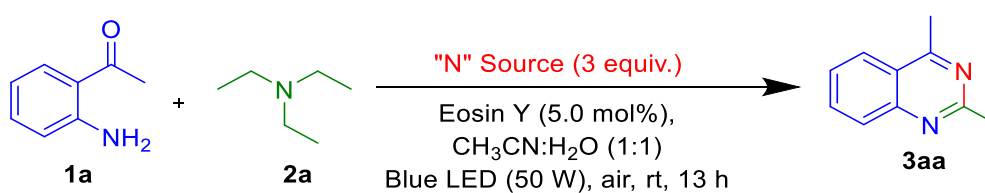

| S.No     | Nitrogen Source            | Yield (%) <sup>b</sup> |
|----------|----------------------------|------------------------|
| 1        | NH <sub>4</sub> F          | 92                     |
| 2        | NH <sub>4</sub> OH         | 36                     |
| 3        | NH <sub>4</sub> OAc        | 54                     |
| <b>4</b> | <b>NH<sub>4</sub>Cl</b>    | <b>98</b>              |
| 5        | Without NH <sub>4</sub> Cl | 0                      |

<sup>a</sup>All reactions were carried out using 0.5 mmol of **1a** and 2.5 mmol of **2a**. <sup>b</sup>Isolated yield.

**Table S4. Alkyl Synthone/Electron Donor Screening<sup>a</sup>**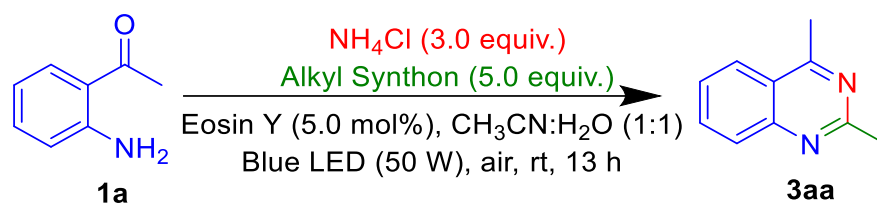

| S.No     | Alkyl Synthone / Electron Donor | Yield (%) <sup>b</sup> |
|----------|---------------------------------|------------------------|
| 1        | DEA                             | 31 (21 h)              |
| 2        | DIPEA                           | 34 (21 h)              |
| <b>3</b> | <b>TEA</b>                      | <b>98 (13 h)</b>       |
| 4        | Without TEA                     | 0                      |

<sup>a</sup>All reactions were carried out using 0.5 mmol of **1a**. <sup>b</sup>Isolated yield.

**Table S5. Equivalent Studies of Photocatalyst, Alkyl Synthone and Nitrogen Source<sup>a</sup>**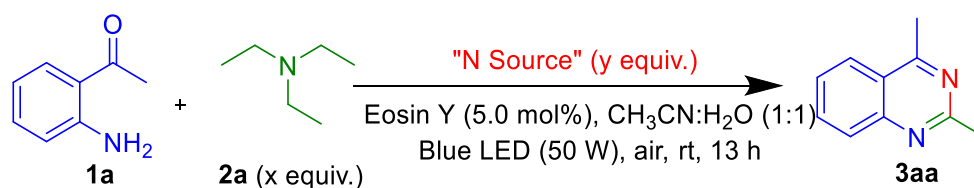

| S.No | Equivalent Studies              | Yield (%) <sup>b</sup> | Time (h) |
|------|---------------------------------|------------------------|----------|
| 1    | NH <sub>4</sub> Cl (2.0 equiv.) | 95                     | 38       |
| 2    | TEA (4.0 equiv.)                | 97                     | 21       |
| 3    | EY (3 mol %)                    | 97                     | 21       |

<sup>a</sup>All reactions were carried out using 0.5 mmol of **1a**. <sup>b</sup>Isolated yield.

### Optimized Condition

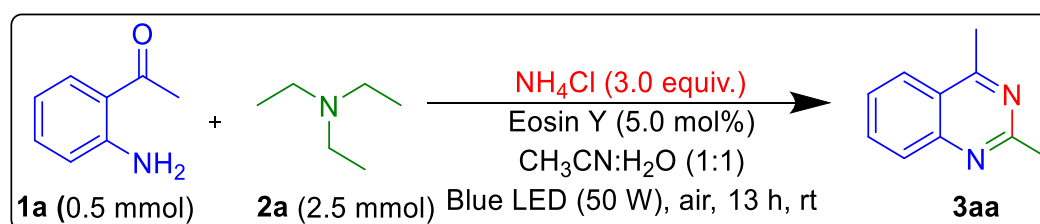**Scheme S1. Optimized Conditions for Synthesis of Quinazolines.**

### (3) Experimental Section

#### 3a. General Experimental Procedure (A) for the Synthesis of Compounds 3aa-3pa

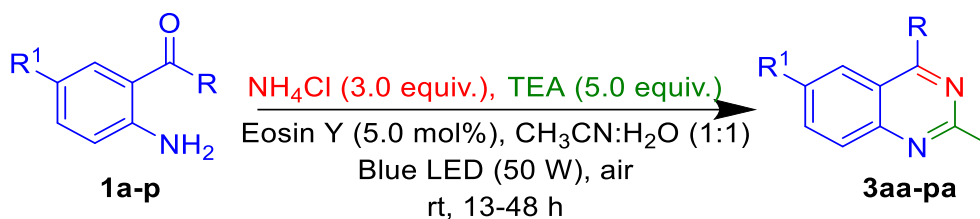

Compound **1a-1p** (0.5 mmol) was dissolved in 0.15 M of CH<sub>3</sub>CN:H<sub>2</sub>O (1:1, 3.3 mL) followed by the addition of triethylamine (2.5 mmol), NH<sub>4</sub>Cl (1.5 mmol) and Eosin Y (5.0 mol%). The reaction mixture was allowed to stir under the 50 W blue LED in the open air. The reaction completion was monitored by TLC chromatography (~13-48 h). After completion, the reaction was diluted with 10 mL of water and extracted with ethyl acetate (3 x 10 mL). The combined ethyl acetate layer was dried over anhydrous sodium sulfate and concentrated under reduced pressure to get a crude compound. The obtained crude was purified using column chromatography by eluting hexane/ethyl acetate to afford the desired product **3aa-pa** in 52 % to 98 % yields.

#### 3b. General Experimental Procedure (B) for the Synthesis of Compounds 3ab-gj'

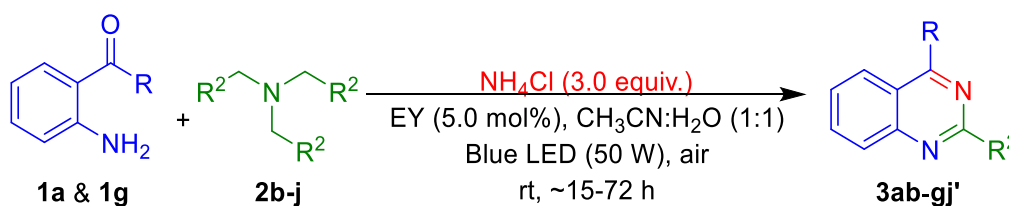

Compound **1a** (0.5 mmol) was dissolved in 0.15 M of CH<sub>3</sub>CN:H<sub>2</sub>O (1:1, 3.3 mL) followed by the addition of trialkylamines **2b-j** (2.5 mmol), NH<sub>4</sub>Cl (1.5 mmol) and Eosin Y (5.0 mol%). The reaction mixture was allowed to stir under the 50 W blue LED in the open air. The reaction completion was monitored by TLC chromatography (~15-72 h). After completion, the reaction was diluted with 10.0 mL of water and extracted with ethyl acetate (3 x 10 mL). The combined ethyl acetate layer was dried over anhydrous Na<sub>2</sub>SO<sub>4</sub> and concentrated under reduced pressure to get a crude compound. The obtained crude was purified using column

chromatography by eluting hexane/ethyl acetate to afford the desired product **3ab-ah**, **3aj**, **3gj** and **3gj'** in 41 % to 96 % yields.

### 3c. General Experimental Procedure (C) for the Gram Scale Synthesis of Compounds **3ga**, **3ja** and **3ma**

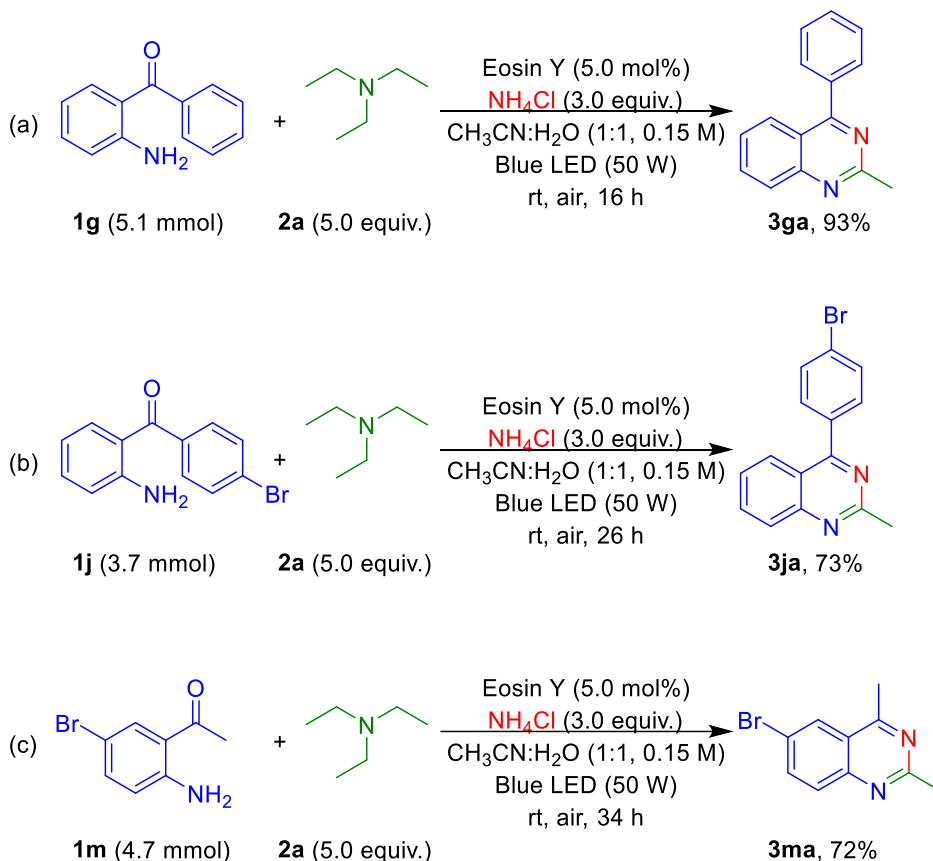

Compound **1g** (5.1 mmol) was dissolved in 0.15 M of CH<sub>3</sub>CN:H<sub>2</sub>O (1:1) followed by the addition of triethylamine (5.0 equiv.), NH<sub>4</sub>Cl (3.0 equiv.) and Eosin Y (5.0 mol%). The reaction mixture was stirred under the 50 W blue LED in the open air for 16 h and the completion of the reaction was monitored by TLC chromatography. The reaction mixture was diluted with 100 mL of water and extracted with ethyl acetate (3 x 75 mL). The combined ethyl acetate layer was dried over anhydrous sodium sulfate and concentrated under reduced pressure to get a crude compound. The obtained crude was purified using column chromatography by eluting hexane/ethyl acetate to afford the desired product **3ga** in 93%. The above same procedure was used to synthesize **3ja** in 73 % yield and **3ma** in 72 % yields respectively.

#### (4) TLC & Experimental Setup

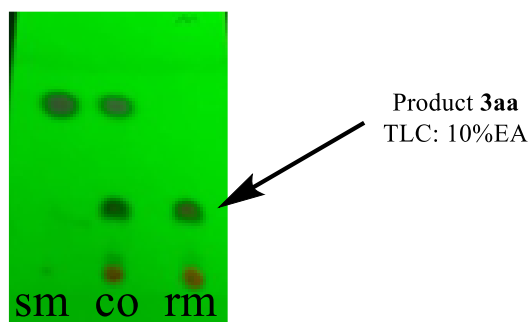

**Figure S1.** TLC for 2-Methyl-3-phenylquinazolin-4(3*H*)-one (**3aa**).

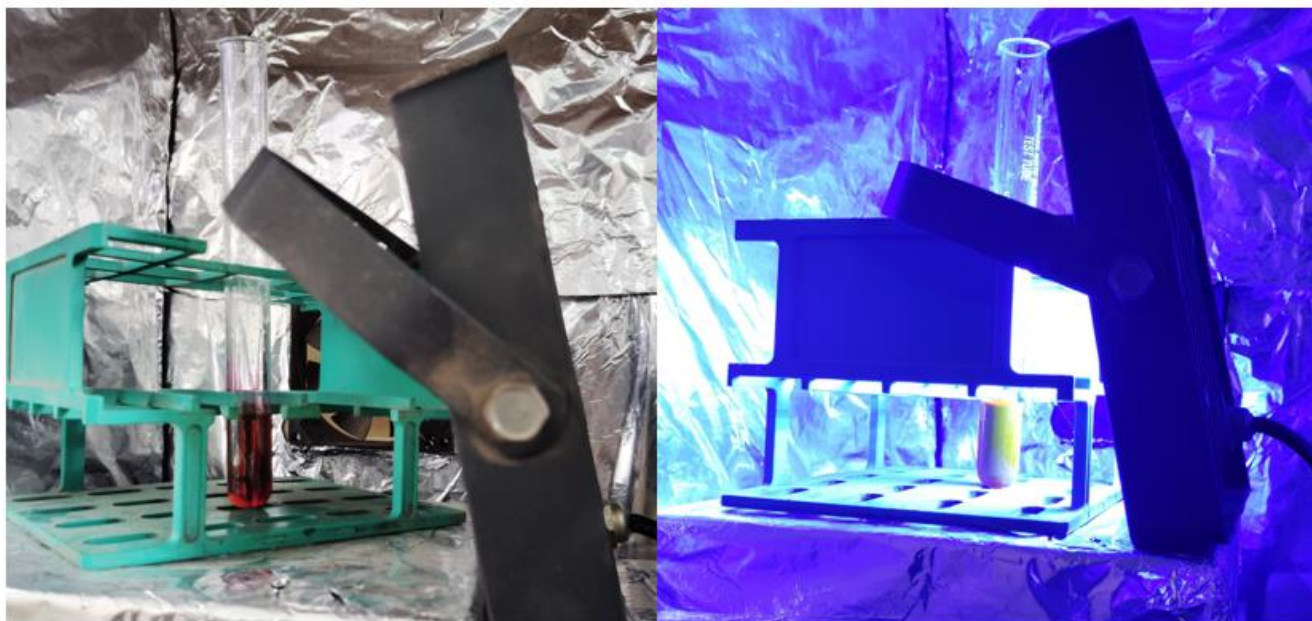

**Figure S2.** Start of the Reaction.

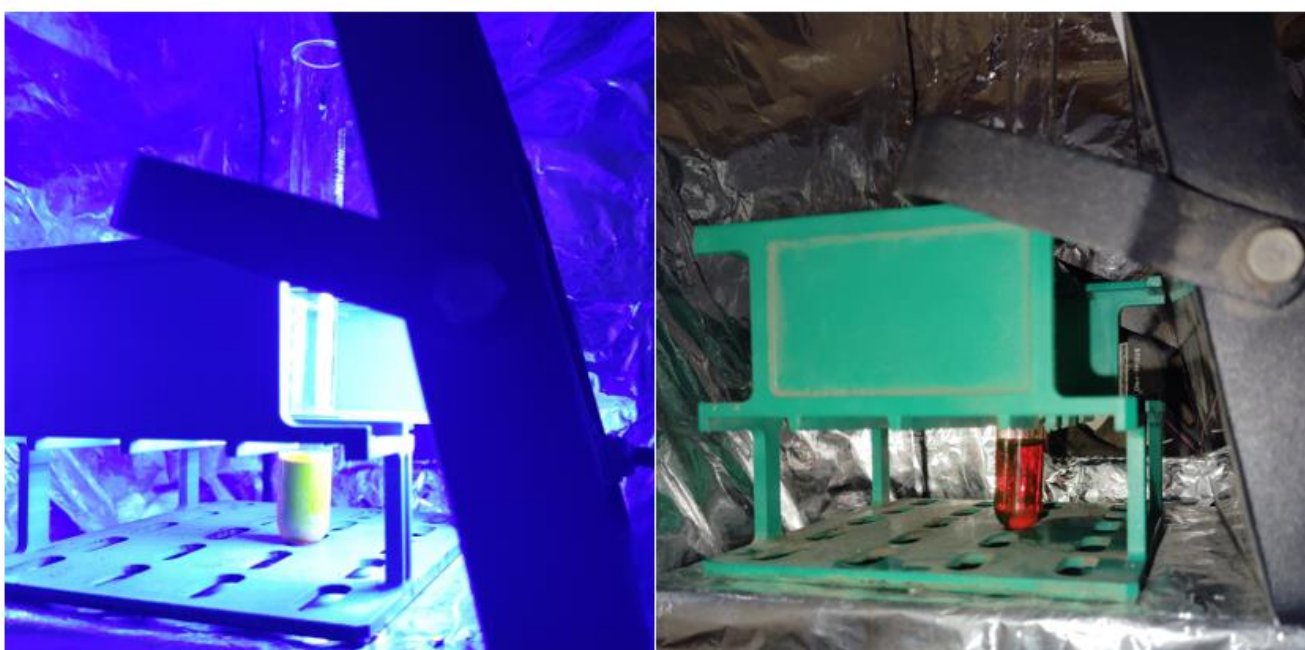

**Figure S3.** Completion of the Reaction.



## (5) GC-MS Studies

GC-MS chromatogram analysis of the reaction mixture of **3aa** was performed on GCMS - QP2010 Plus – Shimadzu during the courses of the reaction (2 h and 10 h) and the intermediates were verified. We have detected the following intermediates, product **3aa** and the minor side products. This strongly suggests that the mechanism goes via proposed in the manuscript.

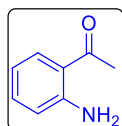

Chemical Formula: C<sub>8</sub>H<sub>9</sub>NO  
Mass: 135, 2h

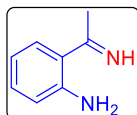

Chemical Formula: C<sub>8</sub>H<sub>10</sub>N<sub>2</sub>  
Mass: 134, 2h

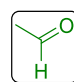

Chemical Formula: C<sub>2</sub>H<sub>4</sub>O  
Mass: 44, 10h

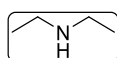

Chemical Formula: C<sub>4</sub>H<sub>11</sub>N  
Mass: 73, 10h

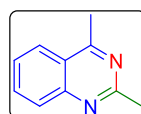

Chemical Formula: C<sub>10</sub>H<sub>10</sub>N<sub>2</sub>  
Mass: 158, 10h

<< Target >>

Line#:59 R Time:19.425(Scan#:3186) MassPeaks:10  
RawMode:Averaged 19.420-19.430(3185-3187) BasePeak:57.05(744)  
BG Mode:Calc. from Peak Group 1 - Event 1 Scan

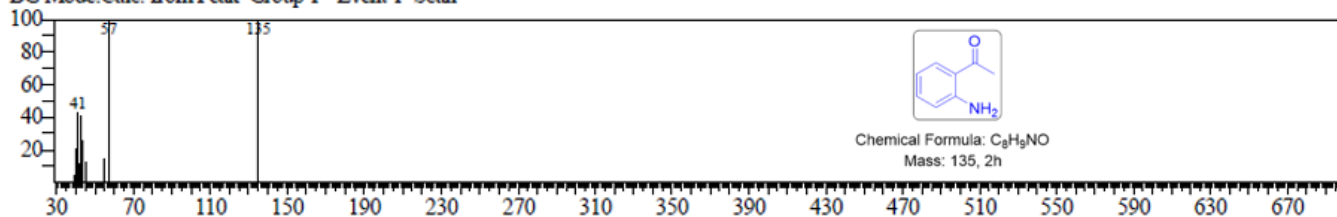

<< Target >>

Line#:141 R Time:26.565(Scan#:4614) MassPeaks:40  
RawMode:Averaged 26.560-26.570(4613-4615) BasePeak:149.00(863)  
BG Mode:Calc. from Peak Group 1 - Event 1 Scan

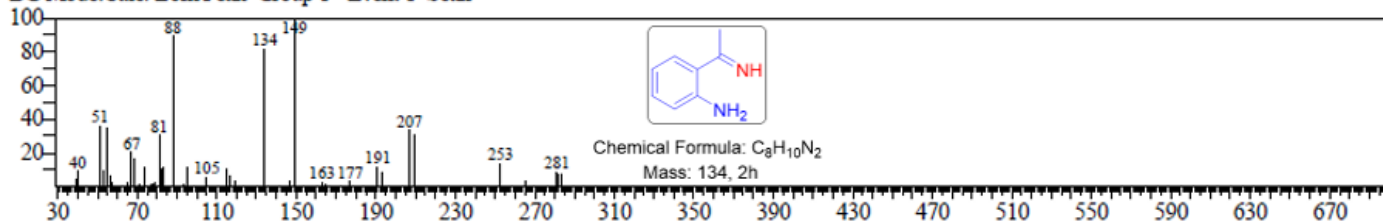

<< Target >>

Line#:4 R Time:4.790(Scan#:259) MassPeaks:15  
RawMode:Averaged 4.785-4.795(258-260) BasePeak:44.00(66267)  
BG Mode:Calc. from Peak Group 1 - Event 1 Scan

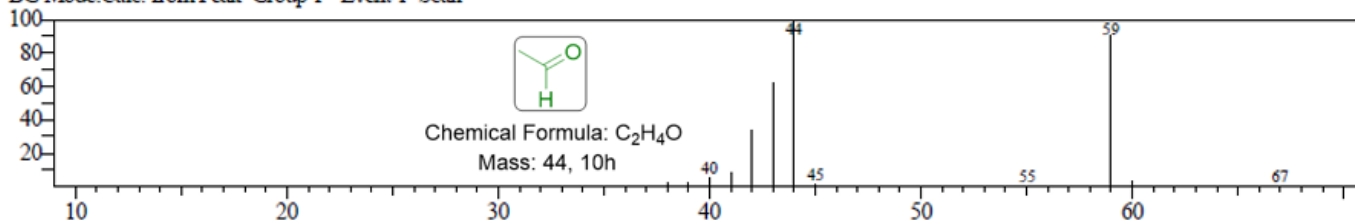

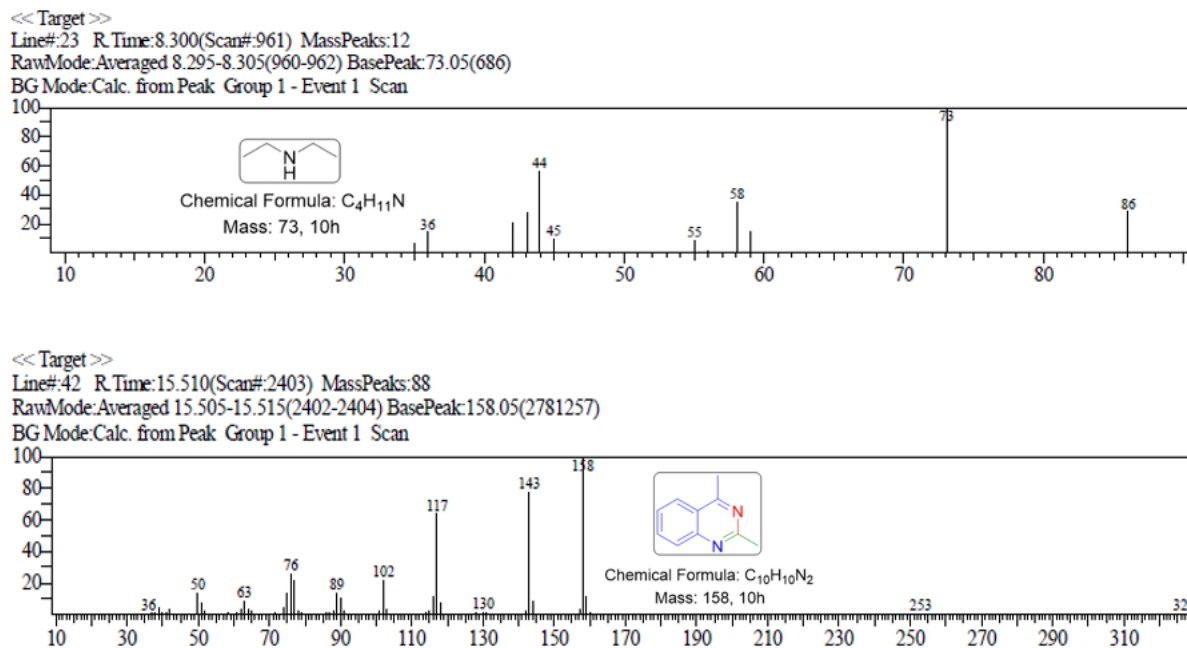

**Figure S4.** GC-MS observed fragments.

## (6) Cyclic-Voltammetry Data

Samples for electrochemical measurements were prepared with 0.1 M of *tetra-n*-butylammonium hexafluorophosphate solution in acetonitrile and 0.05 M of 2-aminoacetophenone (**1a**). Cyclic voltammetry measurements were carried out with Multi Autolab M204 (Serial number: MAC90963) and the data was recorded using an undivided cell equipped with glassy carbon as the working electrode, platinum wire as counter electrode and Ag/AgCl as a reference electrode. A scan rate was used 100 mV s<sup>-1</sup>μ.

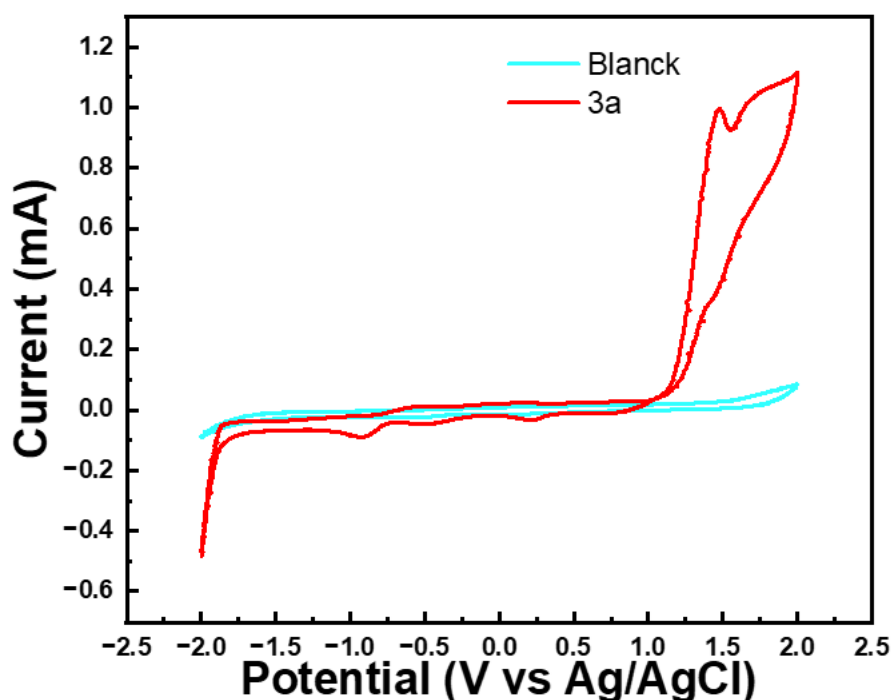

**Figure S5.** Cyclic Voltammogram of 2-Aminoacetophenone (**1a**).

## (7) Spectral Characterization

**2,4-Dimethylquinazoline (3aa).**<sup>5</sup> The title compound was synthesized according to the general procedure (A)

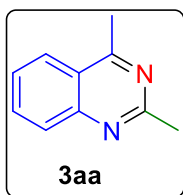

and the product was isolated by column chromatography (Hexane/Ethyl acetate) to obtain colourless oil (78mg, 98%); <sup>1</sup>H NMR (500 MHz, CDCl<sub>3</sub>) δ 8.06 (d, *J* = 8.3 Hz, 1H), 7.94 (d, *J* = 8.4 Hz, 1H), 7.84 (t, *J* = 7.6 Hz, 1H), 7.57 (t, *J* = 7.6 Hz, 1H), 2.93 (s, 3H), 2.86 (s, 3H);

<sup>13</sup>C NMR (101 MHz, CDCl<sub>3</sub>) δ 168.14, 163.61, 150.00, 133.63, 128.32, 126.63, 124.95, 122.27, 26.46, 21.70.

**4-Ethyl-2-methylquinazoline (3ba).**<sup>6</sup> The title compound was synthesized according to the general

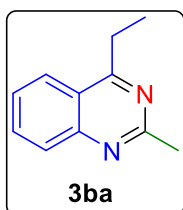

procedure (A) and the product was isolated by column chromatography (Hexane/Ethyl acetate) to obtain colourless oil (71mg, 82%); <sup>1</sup>H NMR (500 MHz, CDCl<sub>3</sub>) δ 8.02 (d, *J* = 8.3 Hz, 1H), 7.89 (d, *J* = 8.4 Hz, 1H), 7.79 – 7.74 (m, 1H), 7.49 (t, *J* = 7.6 Hz, 1H), 3.21 (q, *J* =

7.6 Hz, 2H), 2.81 (s, 3H), 1.38 (t, *J* = 7.6 Hz, 3H); <sup>13</sup>C NMR (101 MHz, CDCl<sub>3</sub>) δ 172.58, 163.78, 150.31, 133.44, 128.47, 126.56, 124.58, 121.42, 27.98, 26.51, 13.36.

**2-Methyl-4-propylquinazoline (3ca).** The title compound was synthesized according to the general

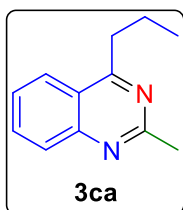

procedure (A) and the product was isolated by column chromatography (Hexane/Ethyl acetate) to obtain yellow oil (71mg, 76%); <sup>1</sup>H NMR (500 MHz, CDCl<sub>3</sub>) δ 8.09 (d, *J* = 8.3 Hz, 1H), 7.94 (d, *J* = 8.4 Hz, 1H), 7.84 – 7.81 (m, 1H), 7.56 (t, *J* = 7.6 Hz, 1H), 3.23 – 3.19 (m,

2H), 2.86 (s, 3H), 1.93 – 1.85 (m, 2H), 1.08 (t, *J* = 7.4 Hz, 3H); <sup>13</sup>C NMR (101 MHz, CDCl<sub>3</sub>) δ 171.70, 163.78, 150.47, 133.53, 128.53, 126.59, 124.83, 121.83, 36.85, 26.62, 22.99, 14.40; HRMS (ESI) calculated for C<sub>12</sub>H<sub>15</sub>N<sub>2</sub> [M+H]<sup>+</sup>: 187.1235 found 187.1250.

**2-Methyl-4-octylquinazoline (3da).** The title compound was synthesized according to the general procedure

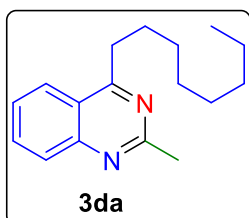

(A) and the product was isolated by column chromatography (Hexane/Ethyl acetate) to obtain yellow oil (69mg, 54%); <sup>1</sup>H NMR (500 MHz, CDCl<sub>3</sub>) δ 8.08 (d, *J* = 8.3 Hz, 1H), 7.94 (d, *J* = 8.3 Hz, 1H), 7.84 – 7.80 (m, 1H), 7.57 – 7.53 (m, 1H), 3.22 (t, *J* = 8.0 Hz,

2H), 2.86 (s, 3H), 1.87 – 1.81 (m, 2H), 1.50 – 1.44 (m, 2H), 1.37 – 1.33 (m, 2H), 1.30 – 1.25 (m, 6H), 0.88 (t, *J* = 7.0 Hz, 3H); <sup>13</sup>C NMR (101 MHz, CDCl<sub>3</sub>) δ 171.91, 163.74, 150.42, 133.46, 128.49, 126.53, 124.76,

121.71, 34.99, 31.91, 29.94, 29.67, 29.49, 29.27, 26.57, 22.72, 14.16; HRMS (ESI) calculated for C<sub>17</sub>H<sub>25</sub>N<sub>2</sub> [M+H]<sup>+</sup> : 257.2018 found 257.2035.

**4-Isopropyl-2-methylquinazoline (3ea).**<sup>7</sup> The title compound was synthesized according to the general

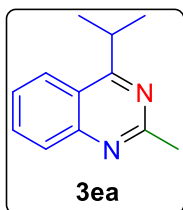

procedure (A) and the product was isolated by column chromatography (Hexane/Ethyl acetate) to obtain yellow oil (54mg, 58%); <sup>1</sup>H NMR (500 MHz, CDCl<sub>3</sub>) δ 8.12 (d, *J* = 8.4 Hz, 1H), 7.94 (d, *J* = 8.4 Hz, 1H), 7.83 – 7.79 (m, 1H), 7.56 – 7.52 (m, 1H), 3.92 – 3.87 (m, 1H),

2.86 (s, 3H), 1.43 (t, *J* = 1.5 Hz 3H), 1.42 (t, *J* = 1.5 Hz, 3H); <sup>13</sup>C NMR (101 MHz, CDCl<sub>3</sub>) δ 175.68, 163.99, 150.54, 133.16, 128.64, 126.38, 124.15, 121.01, 30.99, 26.71, 21.80.

**4-Cyclopentyl-2-methylquinazoline (3fa).**<sup>8</sup> The title compound was synthesized according to the general

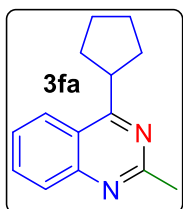

procedure (A) and the product was isolated by column chromatography (Hexane/Ethyl acetate) to obtain yellow oil (71mg, 67%); <sup>1</sup>H NMR (500 MHz, CDCl<sub>3</sub>) δ 8.12 (d, *J* = 8.4 Hz, 1H), 7.91 (d, *J* = 8.4 Hz, 1H), 7.81 – 7.77 (m, 1H), 7.54 – 7.50 (m, 1H), 3.98 – 3.92 (m, 1H),

2.84 (s, 3H), 2.12 – 2.08 (m, 4H), 1.91 – 1.90 (m, 2H), 1.77 – 1.76 (m, 2H); <sup>13</sup>C NMR (101 MHz, CDCl<sub>3</sub>) δ 174.33, 163.81, 150.27, 133.05, 128.33, 126.22, 124.55, 121.82, 42.56, 32.61, 26.65, 26.20.

**2-Methyl-4-phenylquinazoline (3ga).**<sup>9</sup> The title compound was synthesized according to the general

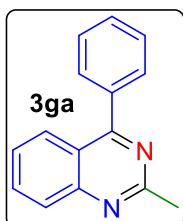

procedure (A) and the product was isolated by column chromatography (Hexane/Ethyl acetate) to obtain colourless oil (101mg, 92%); <sup>1</sup>H NMR (500 MHz, CDCl<sub>3</sub>) δ 8.03 (dd, *J* = 12.4, 8.6 Hz, 2H), 7.88 – 7.84 (m, 1H), 7.76 – 7.74 (m, 2H), 7.56 – 7.50 (m, 3H), 7.52 (t, *J* =

7.6 Hz, 1H), 2.96 (s, 3H); <sup>13</sup>C NMR (101 MHz, CDCl<sub>3</sub>) δ 168.64, 163.91, 151.53, 137.39, 133.68, 129.93, 128.68, 128.24, 127.09, 126.78, 121.11, 26.70.

**4-(4-Fluorophenyl)-2-methylquinazoline (3ha).**<sup>9</sup> The title compound was synthesized according to the

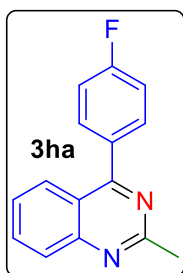

general procedure (A) and the product was isolated by column chromatography (Hexane/Ethyl acetate) to obtain white solid (98mg, 82%); mp 113-115 °C (lit. 116-117 °C);

<sup>1</sup>H NMR (500 MHz, CDCl<sub>3</sub>) δ 8.02 (d, *J* = 8.3 Hz, 2H), 7.88 (t, *J* = 7.5 Hz, 1H), 7.77 (q, *J* = 8.2, 5.5 Hz, 2H), 7.55 (t, *J* = 7.6 Hz, 1H), 7.27 (t, *J* = 8.5 Hz, 2H), 2.95 (s, 3H); <sup>13</sup>C NMR

(101 MHz, CDCl<sub>3</sub>)  $\delta$  166.41 ( $J_F = 227.2$  Hz), 163.95, 162.79, 151.66, 133.86, 133.55, 132.04 ( $J_F = 9.0$  Hz), 128.42, 127.01, 126.83, 121.06, 115.90 ( $J_F = 22.1$  Hz), 26.70.

**4-(4-Chlorophenyl)-2-methylquinazoline (3ia).**<sup>9</sup> The title compound was synthesized according to the

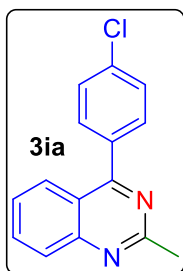

general procedure (A) and the product was isolated by column chromatography (Hexane/Ethyl acetate) to obtain white solid (97mg, 83%); mp 120-122 °C (lit. 128-129 °C); <sup>1</sup>H NMR (500 MHz, CDCl<sub>3</sub>)  $\delta$  8.01 (t,  $J = 9.8$  Hz, 2H), 7.88 (t,  $J = 7.6$  Hz, 1H), 7.71 (d,  $J = 7.3$  Hz, 2H), 7.55 (d,  $J = 7.4$  Hz, 3H), 2.94 (s, 3H); <sup>13</sup>C NMR (101 MHz, CDCl<sub>3</sub>)  $\delta$  167.41,

163.98, 151.64, 136.38, 135.83, 133.92, 131.36, 129.04, 128.45, 127.07, 126.69, 120.96, 26.68.

**4-(4-Bromophenyl)-2-methylquinazoline (3ja).**<sup>9</sup> The title compound was synthesized according to the

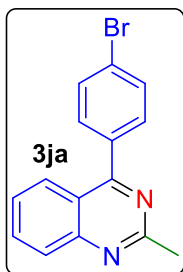

general procedure (A) and the product was isolated by column chromatography (Hexane/Ethyl acetate) to obtain yellow solid (109mg, 73%); mp 124-126 °C (lit. 123-124 °C); <sup>1</sup>H NMR (500 MHz, CDCl<sub>3</sub>)  $\delta$  8.01 (q,  $J = 13.2, 8.4$  Hz, 2H), 7.90 – 7.86 (m, 1H), 7.71 (d,  $J = 8.2$  Hz, 2H), 7.64 (d,  $J = 8.2$  Hz, 2H), 7.54 (t,  $J = 7.6$  Hz, 1H), 2.94 (s, 3H); <sup>13</sup>C NMR

(101 MHz, CDCl<sub>3</sub>)  $\delta$  167.43, 163.97, 151.62, 136.26, 133.92, 131.98, 131.57, 128.43, 127.07, 126.65, 124.67, 120.89, 26.67.

**6-Chloro-4-(2-fluorophenyl)-2-methylquinazoline (3ka).**<sup>10</sup> The title compound was synthesized according

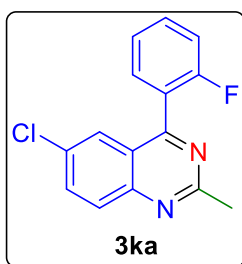

to the general procedure (A) and the product was isolated by column chromatography (Hexane/Ethyl acetate) to obtain white solid (71mg, 52%); mp 134-136 °C (lit. 138-140 °C); <sup>1</sup>H NMR (500 MHz, CDCl<sub>3</sub>)  $\delta$  7.97 (d,  $J = 9.0$  Hz, 2H), 7.81 (dd,  $J = 9.0, 2.2$  Hz, 2H), 7.72 (t,  $J = 2.5$  Hz, 2H), 7.60 – 7.56 (m, 4H), 7.38 (td,  $J = 7.6, 0.9$  Hz, 2H), 7.31 –

7.27 (m, 3H), 2.95 (s, 6H); <sup>13</sup>C NMR (101 MHz, CDCl<sub>3</sub>)  $\delta$  164.46, 163.99, 159.87 ( $J_F = 249.5$  Hz), 149.59, 135.09, 132.78, 132.21, 132.13, 131.58, 129.98, 125.68, 125.01, 122.52, 116.47 ( $J_F = 21.1$  Hz), 26.65.

**6-Bromo-2-methyl-4-(pyridin-2-yl)quinazoline (3la).** The title compound was synthesized according to the

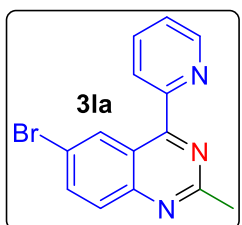

general procedure (A) and the product was isolated by column chromatography (Hexane/Ethyl acetate) to obtain yellow solid (104mg, 69%); mp 158-160 °C; <sup>1</sup>H NMR (500 MHz, CDCl<sub>3</sub>)  $\delta$  9.02 (d,  $J = 2.1$  Hz, 1H), 8.86 – 8.84 (m, 1H), 8.20 – 8.18 (m, 1H),

7.98 – 7.93 (m, 2H), 7.88 (d,  $J = 8.9$  Hz, 1H), 7.51 – 7.49 (m, 1H), 2.95 (s, 3H);  $^{13}\text{C}$  NMR (101 MHz,  $\text{CDCl}_3$ )  $\delta$  164.07, 163.47, 156.17, 150.94, 149.19, 137.47, 137.31, 130.21, 129.90, 125.33, 124.81, 121.90, 121.01, 26.62; HRMS (ESI) calculated for  $\text{C}_{14}\text{H}_{11}\text{BrN}_3$   $[\text{M}+\text{H}]^+$  : 300.0136 found 300.0135.

**6-Bromo-2,4-dimethylquinazoline (3ma).**<sup>7</sup> The title compound was synthesized according to the general

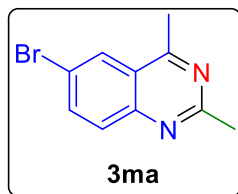

procedure (A) and the product was isolated by column chromatography (Hexane/Ethyl acetate) to obtain white solid (85mg, 72%); mp 99-101 °C (lit. 130-132 °C);  $^1\text{H}$  NMR (500 MHz,  $\text{CDCl}_3$ )  $\delta$  8.20 (d,  $J = 2.1$  Hz, 1H), 7.90 (dd,  $J = 8.9, 2.1$  Hz, 1H), 7.80 (d,  $J = 8.9$

Hz, 1H), 2.89 (s, 3H), 2.83 (s, 3H);  $^{13}\text{C}$  NMR (101 MHz,  $\text{CDCl}_3$ )  $\delta$  167.48, 164.28, 148.87, 137.26, 130.37, 127.56, 123.54, 120.33, 26.66, 21.94.

**6-Iodo-2,4-dimethylquinazoline (3na).** The title compound was synthesized according to the general

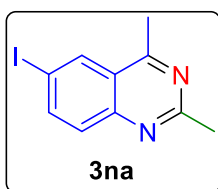

procedure (A) and the product was isolated by column chromatography (Hexane/Ethyl acetate) to obtain yellow solid (87mg, 61%); mp 130-132 °C;  $^1\text{H}$  NMR (500 MHz,  $\text{CDCl}_3$ )  $\delta$  8.43 (s, 1H), 8.06 (dd,  $J = 8.8, 1.6$  Hz, 1H), 7.66 (d,  $J = 8.8$  Hz, 1H), 2.89 (s, 3H), 2.83

(s, 3H);  $^{13}\text{C}$  NMR (101 MHz,  $\text{CDCl}_3$ )  $\delta$  167.12, 164.28, 149.10, 142.41, 134.11, 130.18, 124.04, 91.62, 26.61, 21.83. HRMS (ESI) calculated for  $\text{C}_{10}\text{H}_{10}\text{IN}_2$   $[\text{M}+\text{H}]^+$  : 284.9889 found 284.9896.

**2,4-Dimethyl-6-(phenylethynyl)quinazoline (3oa).** The title compound was synthesized according to the

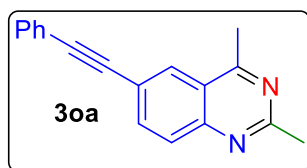

general procedure (A) and the product was isolated by column chromatography (Hexane/Ethyl acetate) to obtain yellow solid (79mg, 61%); mp 124-126 °C;  $^1\text{H}$  NMR (500 MHz,  $\text{CDCl}_3$ )  $\delta$  8.23 (d,  $J = 1.2$  Hz, 1H), 7.94 – 7.88 (m, 2H), 7.60 –

7.58 (m, 2H), 7.41 – 7.38 (m, 3H), 2.93 (s, 3H), 2.86 (s, 3H);  $^{13}\text{C}$  NMR (101 MHz,  $\text{CDCl}_3$ )  $\delta$  167.99, 164.35, 149.51, 136.36, 131.85, 128.90, 128.61, 128.34, 122.80, 122.19, 121.85, 91.15, 88.67, 26.59, 21.85. HRMS (ESI) calculated for  $\text{C}_{18}\text{H}_{15}\text{N}_2$   $[\text{M}+\text{H}]^+$  : 259.1235 found 259.1245.

**2-methylquinazoline (3pa).**<sup>11</sup> The title compound was synthesized according to the general procedure (A)

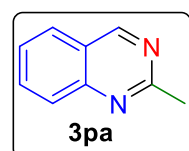

and the product was isolated by column chromatography (Hexane/Ethyl acetate) to obtain colourless oil (50mg, 69%);  $^1\text{H}$  NMR (400 MHz,  $\text{CDCl}_3$ )  $\delta$  9.28 (s, 1H), 7.91 (d,  $J = 8.4$  Hz,

1H), 7.84 (d,  $J = 7.9$  Hz, 2H), 7.55 (t,  $J = 7.1$  Hz, 1H), 2.87 (s, 3H).  $^{13}\text{C}$  NMR (101 MHz,  $\text{CDCl}_3$ )  $\delta$  164.46, 160.37, 150.31, 134.19, 127.67, 127.13, 127.02, 122.87, 26.40.

**4-Methylquinazoline (3ab).**<sup>12</sup> The title compound was synthesized according to the general procedure (B)

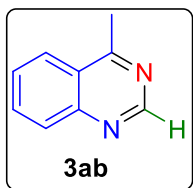

and the product was isolated by column chromatography (Hexane/Ethyl acetate) to obtain colourless oil (69mg, 96%);  $^1\text{H}$  NMR (500 MHz,  $\text{CDCl}_3$ )  $\delta$  9.15 (s, 1H), 8.07 (d,  $J = 8.4$  Hz, 1H), 8.00 (d,  $J = 8.4$  Hz, 1H), 7.88 – 7.84 (m, 1H), 7.62 (t,  $J = 7.6$  Hz, 1H), 2.93 (s, 3H);  $^{13}\text{C}$  NMR (101 MHz,  $\text{CDCl}_3$ )  $\delta$  168.38, 154.66, 149.69, 133.81, 129.15, 127.73, 125.15, 124.64, 21.89.

**2-Ethyl-4-methylquinazoline (3ac).**<sup>10</sup> The title compound was synthesized according to the general

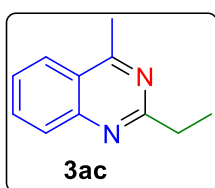

procedure (B) and the product was isolated by column chromatography (Hexane/Ethyl acetate) to obtain colourless oil (79mg, 92%);  $^1\text{H}$  NMR (500 MHz,  $\text{CDCl}_3$ )  $\delta$  8.01 (d,  $J = 8.3$  Hz, 1H), 7.95 (d,  $J = 8.4$  Hz, 1H), 7.81 (t,  $J = 7.7$  Hz, 1H), 7.52 (t,  $J = 7.6$  Hz, 1H), 3.10 (q,  $J = 7.6$  Hz, 2H), 2.91 (s, 3H), 1.46 (t,  $J = 7.6$  Hz, 3H);  $^{13}\text{C}$  NMR (101 MHz,  $\text{CDCl}_3$ )  $\delta$  167.85, 167.50, 149.77, 133.19, 128.25, 126.30, 124.65, 122.21, 32.92, 21.48, 12.86.

**4-Methyl-2-propylquinazoline (3ad).**<sup>5</sup> The title compound was synthesized according to the general

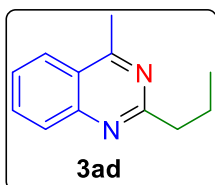

procedure (B) and the product was isolated by column chromatography (Hexane/Ethyl acetate) to obtain colourless oil (87mg, 93%);  $^1\text{H}$  NMR (500 MHz,  $\text{CDCl}_3$ )  $\delta$  8.04 (d,  $J = 8.3$  Hz, 1H), 7.96 (d,  $J = 8.5$  Hz, 1H), 7.83 (td,  $J = 8.0, 1.3$  Hz, 1H), 7.55 (t,  $J = 7.6$  Hz, 1H), 3.08 – 3.01 (m, 2H), 2.93 (s, 3H), 2.00 – 1.90 (m, 2H), 1.05 (t,  $J = 7.4$  Hz, 3H);  $^{13}\text{C}$  NMR (101 MHz,  $\text{CDCl}_3$ )  $\delta$  168.20, 166.94, 150.05, 133.57, 128.57, 126.66, 125.02, 122.56, 42.09, 22.55, 21.84, 14.18.

**2-Butyl-4-methylquinazoline (3ae).**<sup>7</sup> The title compound was synthesized according to the general procedure

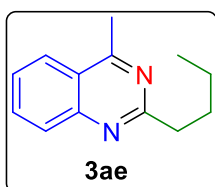

(B) and the product was isolated by column chromatography (Hexane/Ethyl acetate) to obtain yellow oil (82mg, 82%);  $^1\text{H}$  NMR (500 MHz,  $\text{CDCl}_3$ )  $\delta$  8.08 (d,  $J = 8.4$  Hz, 1H), 7.94 (d,  $J = 8.5$  Hz, 1H), 7.84 – 7.81 (m, 1H), 7.55 (td,  $J = 7.5$  Hz, 1H), 3.23 (t,  $J = 8.0$  Hz, 2H), 2.86 (s, 3H), 1.86 – 1.80 (m, 2H), 1.54 – 1.47 (m, 2H), 0.99 (t,  $J = 7.4$  Hz, 3H);  $^{13}\text{C}$  NMR (101 MHz,  $\text{CDCl}_3$ )  $\delta$  171.82, 163.64, 150.30, 133.39, 128.37, 126.46, 124.67, 121.62, 34.60, 31.65, 26.45, 22.97, 13.91.

**4-Methyl-2-pentylquinazoline (3af).**<sup>13</sup> The title compound was synthesized according to the general

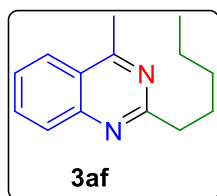

procedure (B) and the product was isolated by column chromatography (Hexane/Ethyl acetate) to obtain yellow oil (85mg, 79%); <sup>1</sup>H NMR (500 MHz, CDCl<sub>3</sub>) δ 8.05 (d, *J* = 8.3 Hz, 1H), 7.96 (d, *J* = 8.5 Hz, 1H), 7.85 – 7.81 (m, 1H), 7.55 (t, *J* = 7.6 Hz, 1H), 3.05 (t, *J*

= 7.9 Hz, 2H), 2.93 (s, 3H), 1.93 – 1.88 (m, 2H), 1.44 – 1.36 (m, 4H), 0.91 (t, *J* = 7.0 Hz, 3H); <sup>13</sup>C NMR (101 MHz, CDCl<sub>3</sub>) δ 168.16, 167.13, 150.02, 133.53, 128.52, 126.60, 124.98, 122.50, 40.18, 31.97, 28.94, 22.69, 21.81, 14.15.

**2-Heptyl-4-methylquinazoline (3ag).** The title compound was synthesized according to the general

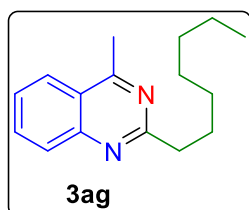

procedure (B) and the product was isolated by column chromatography (Hexane/Ethyl acetate) to obtain yellow oil (90mg, 74%); <sup>1</sup>H NMR (500 MHz, CDCl<sub>3</sub>) δ 8.06 (d, *J* = 8.3 Hz, 1H), 7.96 (d, *J* = 8.4 Hz, 1H), 7.85 – 7.82 (m, 1H), 7.58 – 7.54 (m, 1H), 3.05 (t,

*J* = 7.9 Hz, 2H), 2.93 (s, 3H), 1.93 – 1.86 (m, 2H), 1.45 – 1.27 (m, 8H), 0.87 (t, *J* = 7.0 Hz, 3H); <sup>13</sup>C NMR (101 MHz, CDCl<sub>3</sub>) δ 160.80, 159.79, 142.69, 126.17, 121.19, 119.24, 117.63, 115.17, 32.87, 24.53, 22.37, 21.95, 21.90, 15.39, 14.45, 6.82; HRMS (ESI) calculated for C<sub>16</sub>H<sub>23</sub>N<sub>2</sub> [M+H]<sup>+</sup> : 243.1861 found 243.1865.

**2-Isobutyl-4-methylquinazoline (3ah).**<sup>14</sup> The title compound was synthesized according to the general

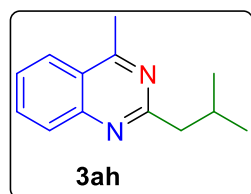

procedure (B) and the product was isolated by column chromatography (Hexane/Ethyl acetate) to obtain yellow oil (76mg, 76%); <sup>1</sup>H NMR (500 MHz, CDCl<sub>3</sub>) δ 8.07 (dd, *J* = 0.5, 1 Hz, 1H), 7.97 (d, *J* = 8.5 Hz, 1H), 7.86 – 7.82 (m, 1H), 7.59 – 7.55 (m, 1H), 2.94

(t, *J* = 3.6 Hz, 5H), 2.44 – 2.36 (m, 1H), 1.00 (d, *J* = 6.7 Hz, 6H); <sup>13</sup>C NMR (101 MHz, CDCl<sub>3</sub>) δ 168.01, 166.43, 150.06, 133.51, 128.69, 126.65, 125.02, 122.57, 48.99, 28.77, 22.69, 21.87.

**(4-Methylquinazolin-2-yl)methanol (3aj).** The title compound was synthesized according to the general

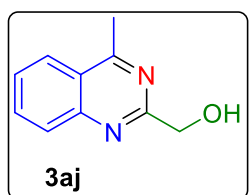

procedure (B) and the product was isolated by column chromatography (Hexane/Ethyl acetate) to obtain white solid (44mg, 51%); mp 76-78°C; <sup>1</sup>H NMR (500 MHz, CDCl<sub>3</sub>) δ 8.11 (d, *J* = 8.3 Hz, 1H), 8.00 (d, *J* = 8.4 Hz, 1H), 7.92 – 7.88 (m, 1H), 7.63 (t, *J* = 7.6

Hz, 1H), 4.95 (d, *J* = 3.4 Hz, 2H), 4.16 (s, 1H), 2.96 (s, 3H); <sup>13</sup>C NMR (101 MHz, CDCl<sub>3</sub>) δ 169.07, 163.73, 149.23, 134.18, 128.47, 127.37, 125.34, 123.41, 64.69, 21.89. HRMS (ESI) calculated for C<sub>10</sub>H<sub>11</sub>N<sub>2</sub>O [M+H]<sup>+</sup> : 175.0871 found 175.0874.



(4-Phenylquinazolin-2-yl)methanol (**3gj**).<sup>15</sup> The title compound was synthesized according to the general

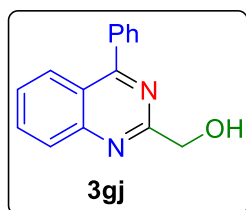

procedure (B) and the product was isolated by column chromatography (Hexane/Ethyl acetate) to obtain white solid (63mg, 53%); mp 147-149 °C (lit. 153-155 °C); <sup>1</sup>H NMR (500 MHz, CDCl<sub>3</sub>) δ 8.14 – 8.09 (m, 2H), 7.95 – 7.92 (m, 1H), 7.79 – 7.77 (m, 2H), 7.62

– 7.58 (m, 4H), 5.05 (d, *J* = 4.4 Hz, 2H), 4.14 (t, *J* = 4.5 Hz, 1H); <sup>13</sup>C NMR (101 MHz, CDCl<sub>3</sub>) δ 169.21, 163.99, 150.84, 137.06, 134.24, 130.35, 130.08, 128.83, 128.39, 127.51, 122.21, 64.92.

4-Phenylquinazoline (**3gj'**).<sup>9</sup> The title compound was synthesized according to the general procedure (B) and

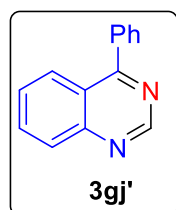

the product was isolated by column chromatography (Hexane/Ethyl acetate) to obtain colourless oil (42mg, 41%); <sup>1</sup>H NMR (500 MHz, CDCl<sub>3</sub>) δ 9.26 (s, 1H), 7.97 (d, *J* = 8.2 Hz, 2H), 7.73 (t, *J* = 7.6 Hz, 1H), 7.64 (s, 2H), 7.42 (s, 4H); <sup>13</sup>C NMR (101 MHz, CDCl<sub>3</sub>) δ

167.99, 154.35, 150.78, 136.79, 133.37, 129.78, 129.72, 128.58, 128.34, 127.44, 126.76, 122.80.

## (8) References

1. C. M. Counciller, C. C. Eichman, B. C. Wray and J. P. Stambuli, *Org. Lett.*, 2008, **10**, 1021-1023.
2. Z. Huang, Y. Yang, Q. Xiao, Y. Zhang and J. Wang, *Eur. J. Org. Chem.*, 2012, **2012**, 6586-6593.
3. E. A. Krasnokutskaya, N. I. Semenischeva, V. D. Filimonov and P. Knochel, *Synthesis*, 2007, 81-84.
4. C. M. Le, T. Sperger, R. Fu, X. Hou, Y. H. Lim, F. Schoenebeck, and M. Lautens, *J. Am. Chem. Soc.*, 2016, **138**, 14441-14448.
5. L. Tang, Y. Yang, L. Wen, S. Zhang, Z. Zha and Z. Wang, *Org. Chem. Front.*, 2015, **2**, 114-118.
6. J. -T. Hahn and F. D. Popp, *J. Heterocycl. Chem.* 1989, **26**, 1357-1372.
7. Y. Wu, H. Zhao, H. Huang and D. Zhang, *Tetrahedron Lett.*, 2023, **116**, 154313.
8. N. E. Behnke, Z. S. Sales, M. Li and A. T. Herrmann, *J. Org. Chem.*, 2021, **86**, 12945-12955.
9. S. Yuan, B. Yu and H. M. Liu, *Chem. Eur. J.*, 2019, **25**, 13109-13113.
10. U. P. Saikia, G. Borah and P. Pahari, *Eur. J. Org. Chem.*, 2018, **2018**, 1211-1217.
11. C. Huang, Y. Fu, H. Fu, Y. Jiang and Y. Zhaoa, *Chem. Commun.*, 2008, 6333-6335
12. G. Satish, A. Polu, L. Kota and A. Ilangoan, *Org. Biomol. Chem.*, 2019, **17**, 4774-4782.
13. P. T. K. Arachchige and C. S. Yi, *Org. Lett.*, 2019, **21**, 3337-3341.
14. I. Mangalagiu, T. Benneche and K. Undheim, *Tetrahedron Lett.*, 1996, **37**, 1309-1312.

15. P. N. Giraldi, A. Fojanesi, G. P. Tosolini, E. Dradi and W. Logemann, *J. Heterocycl. Chem.*, 1970, **7**, 1429-1431.

## (9) Copies of $^1\text{H}$ and $^{13}\text{C}$ Data

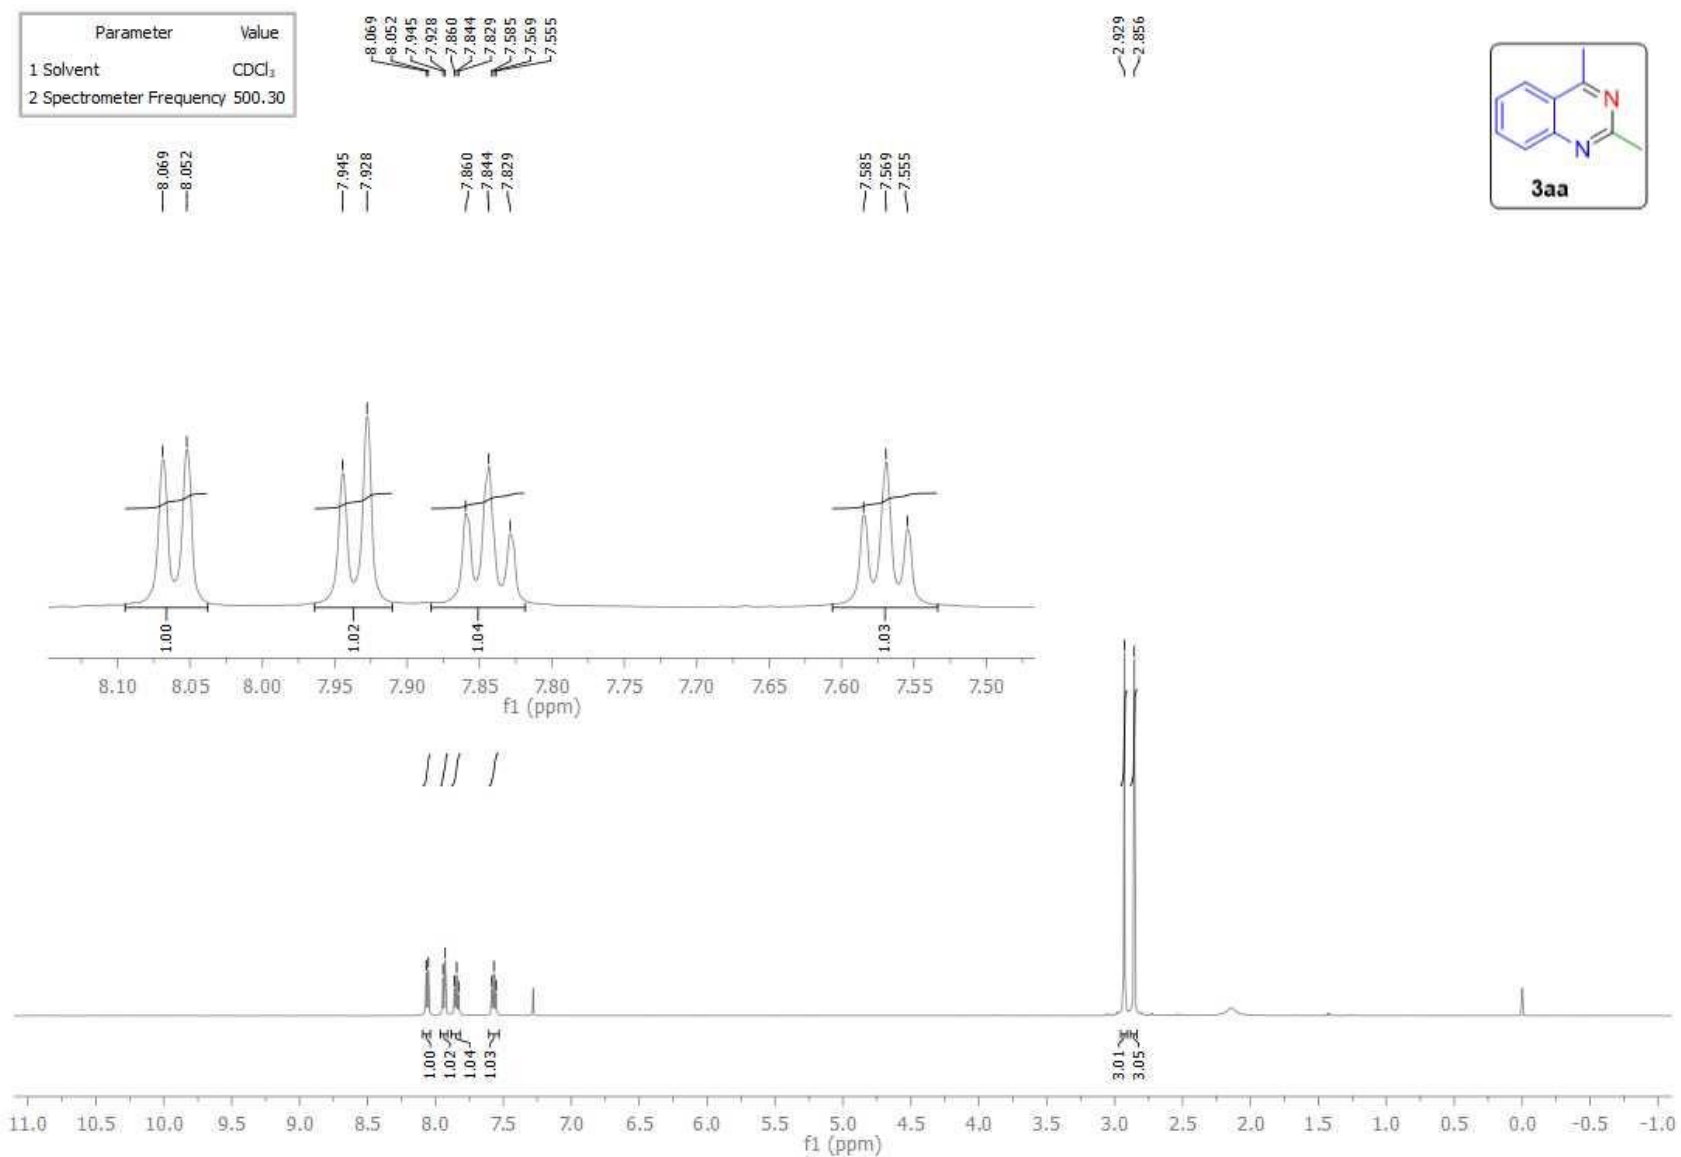

**Figure S6.**  $^1\text{H}$  NMR Spectrum of 2,4-Dimethylquinazoline (**3aa**).

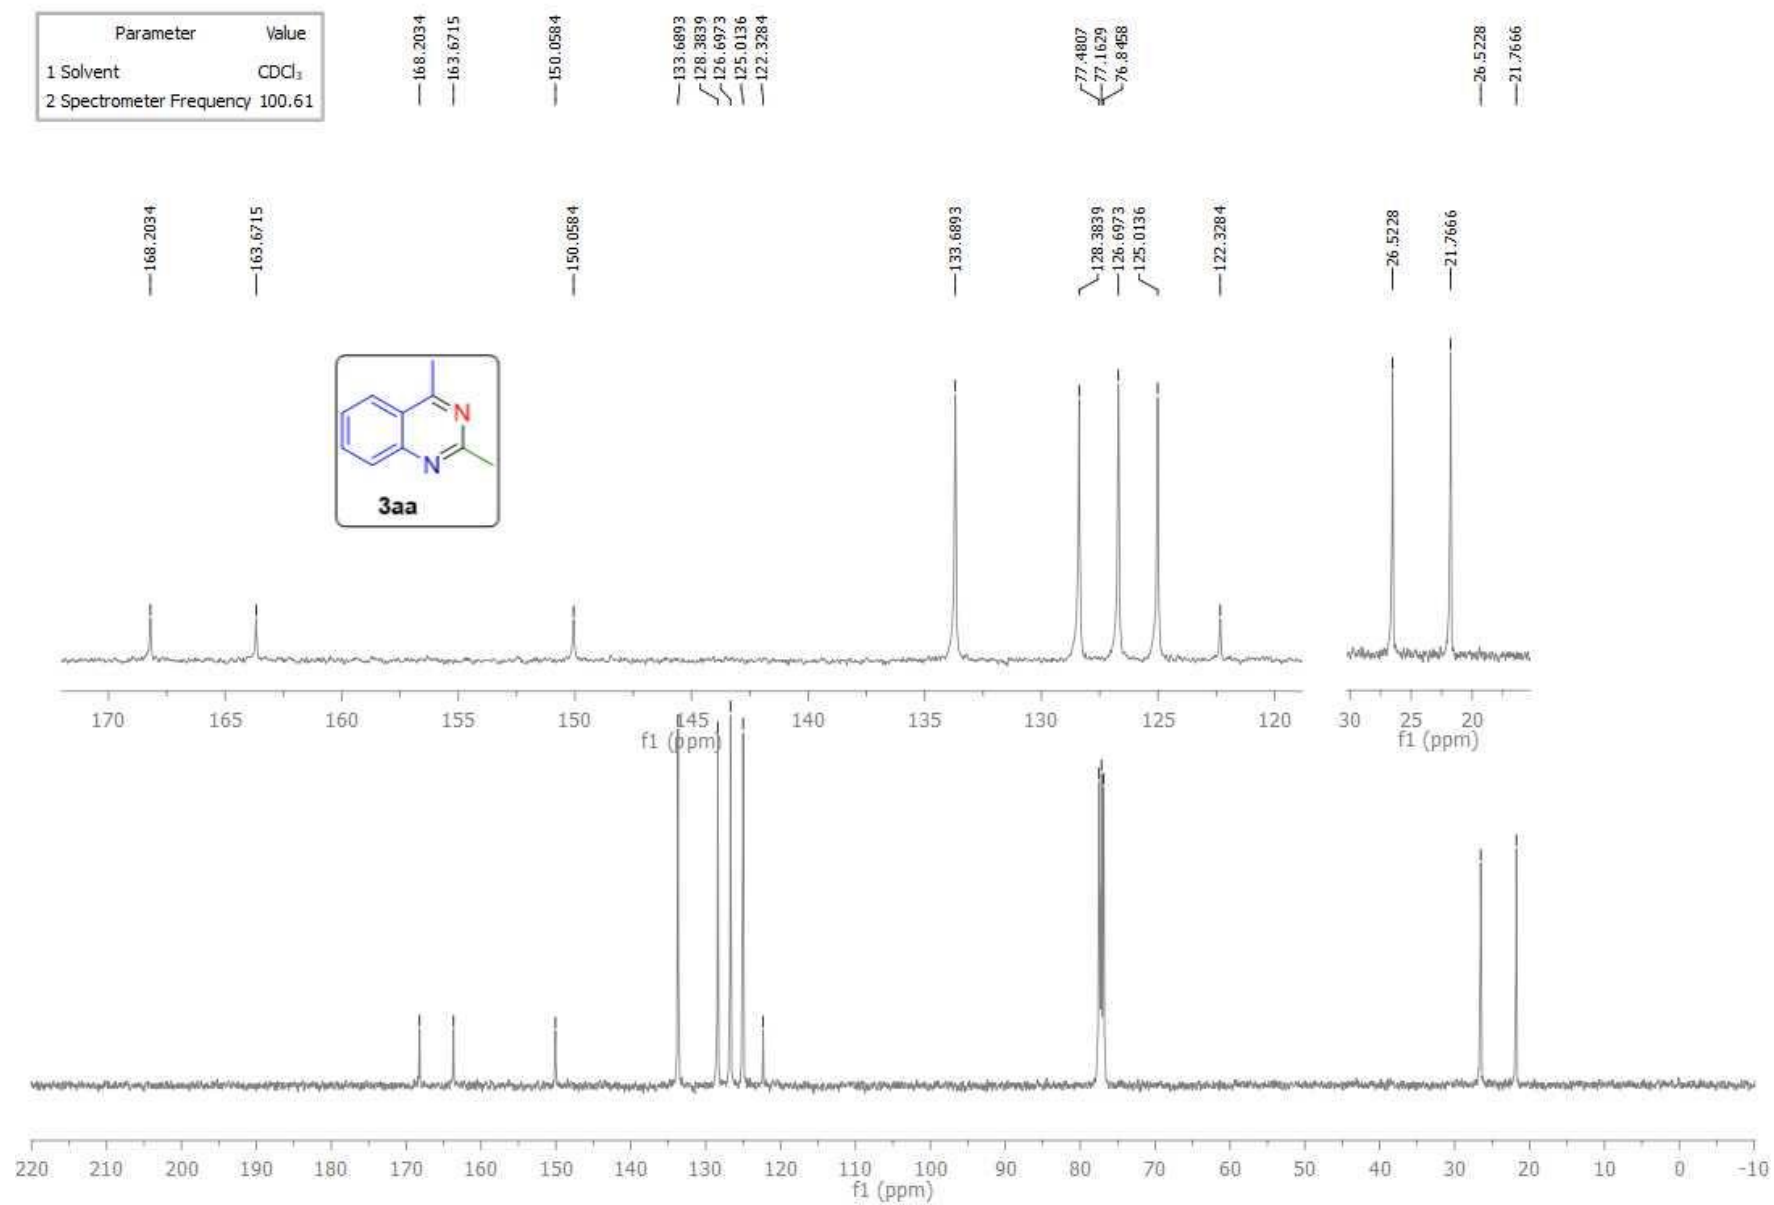

**Figure S7.** <sup>13</sup>C NMR Spectrum of 2,4-Dimethylquinazoline (**3aa**)

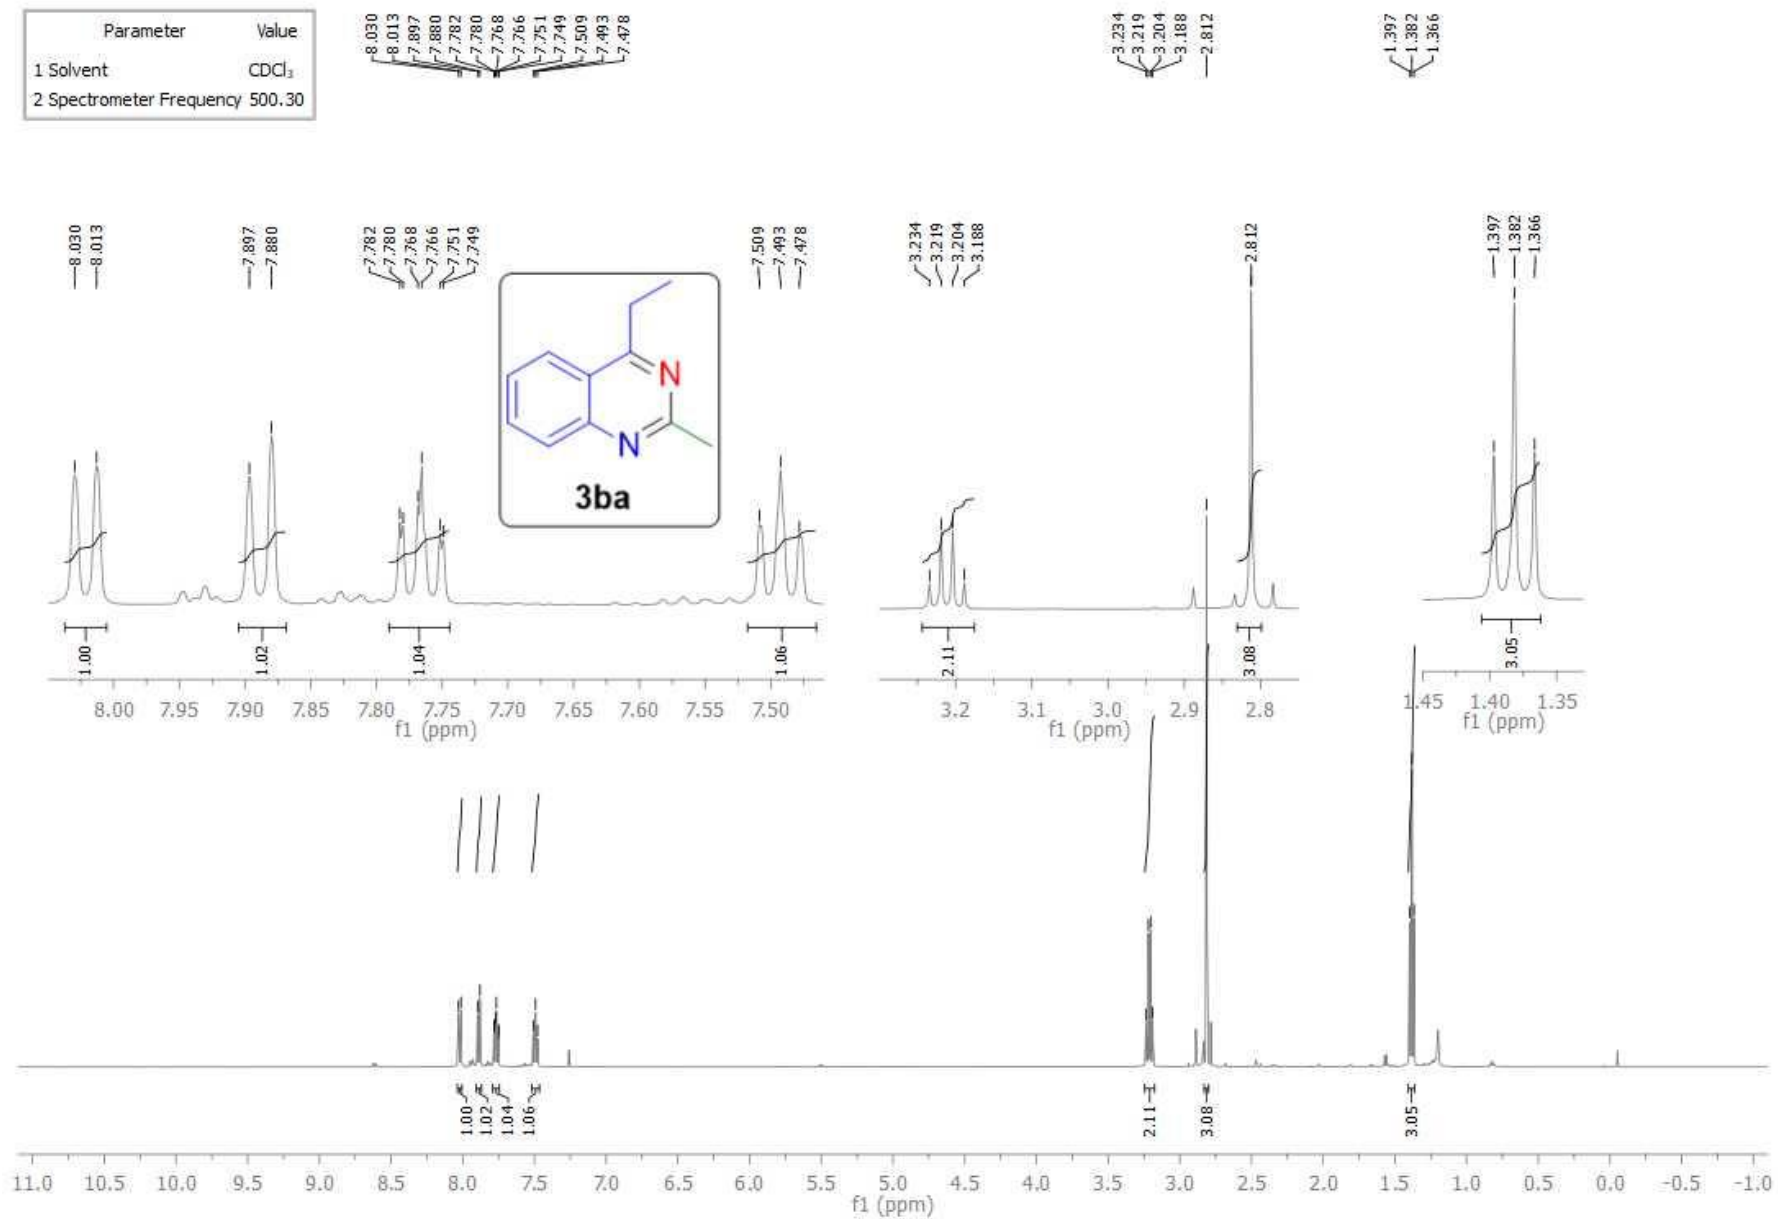

**Figure S8.** <sup>1</sup>H NMR Spectrum of 4-Ethyl-2-methylquinazoline (**3ba**)

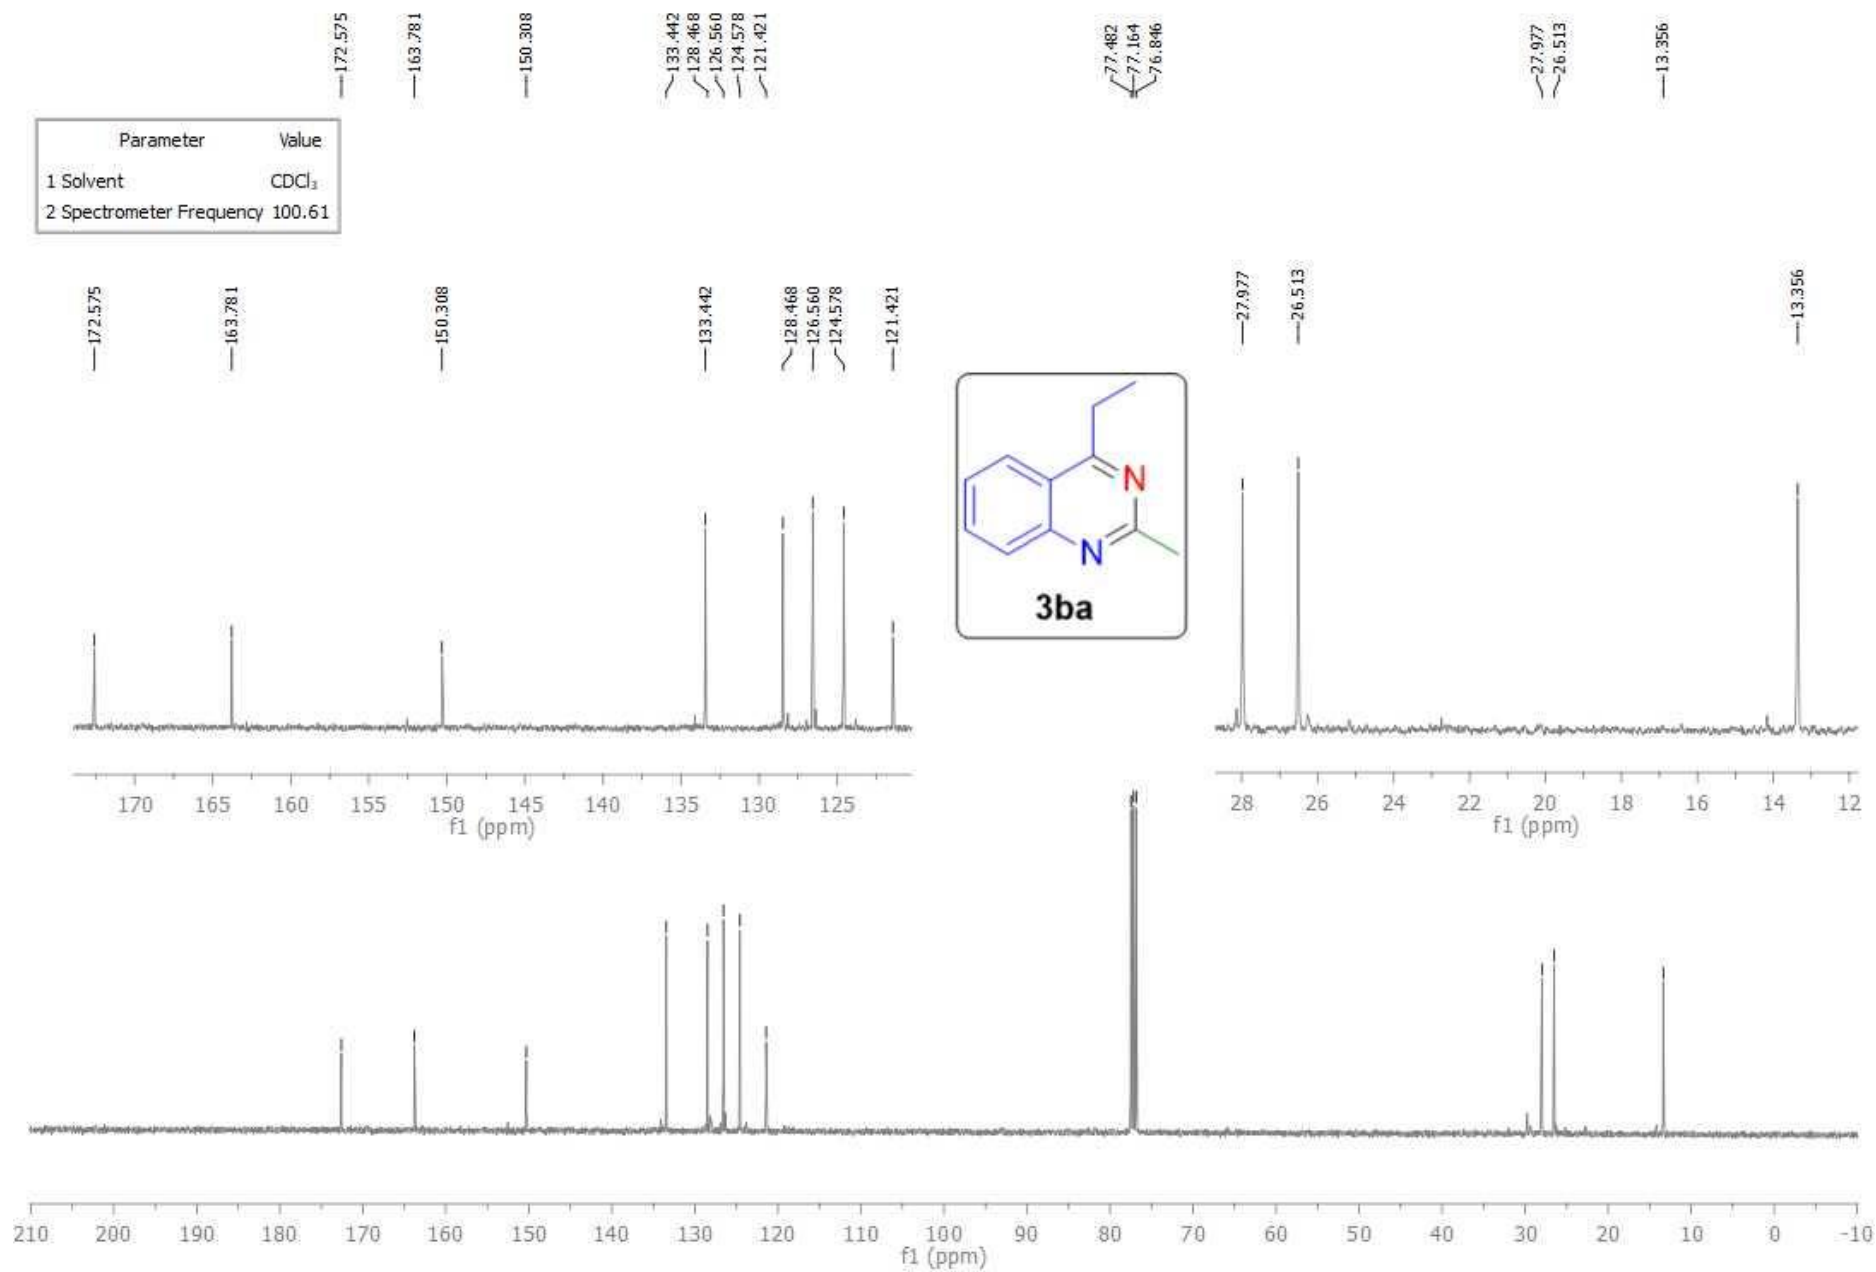

**Figure S9.** <sup>13</sup>C NMR Spectrum of 4-Ethyl-2-methylquinazoline (**3ba**)

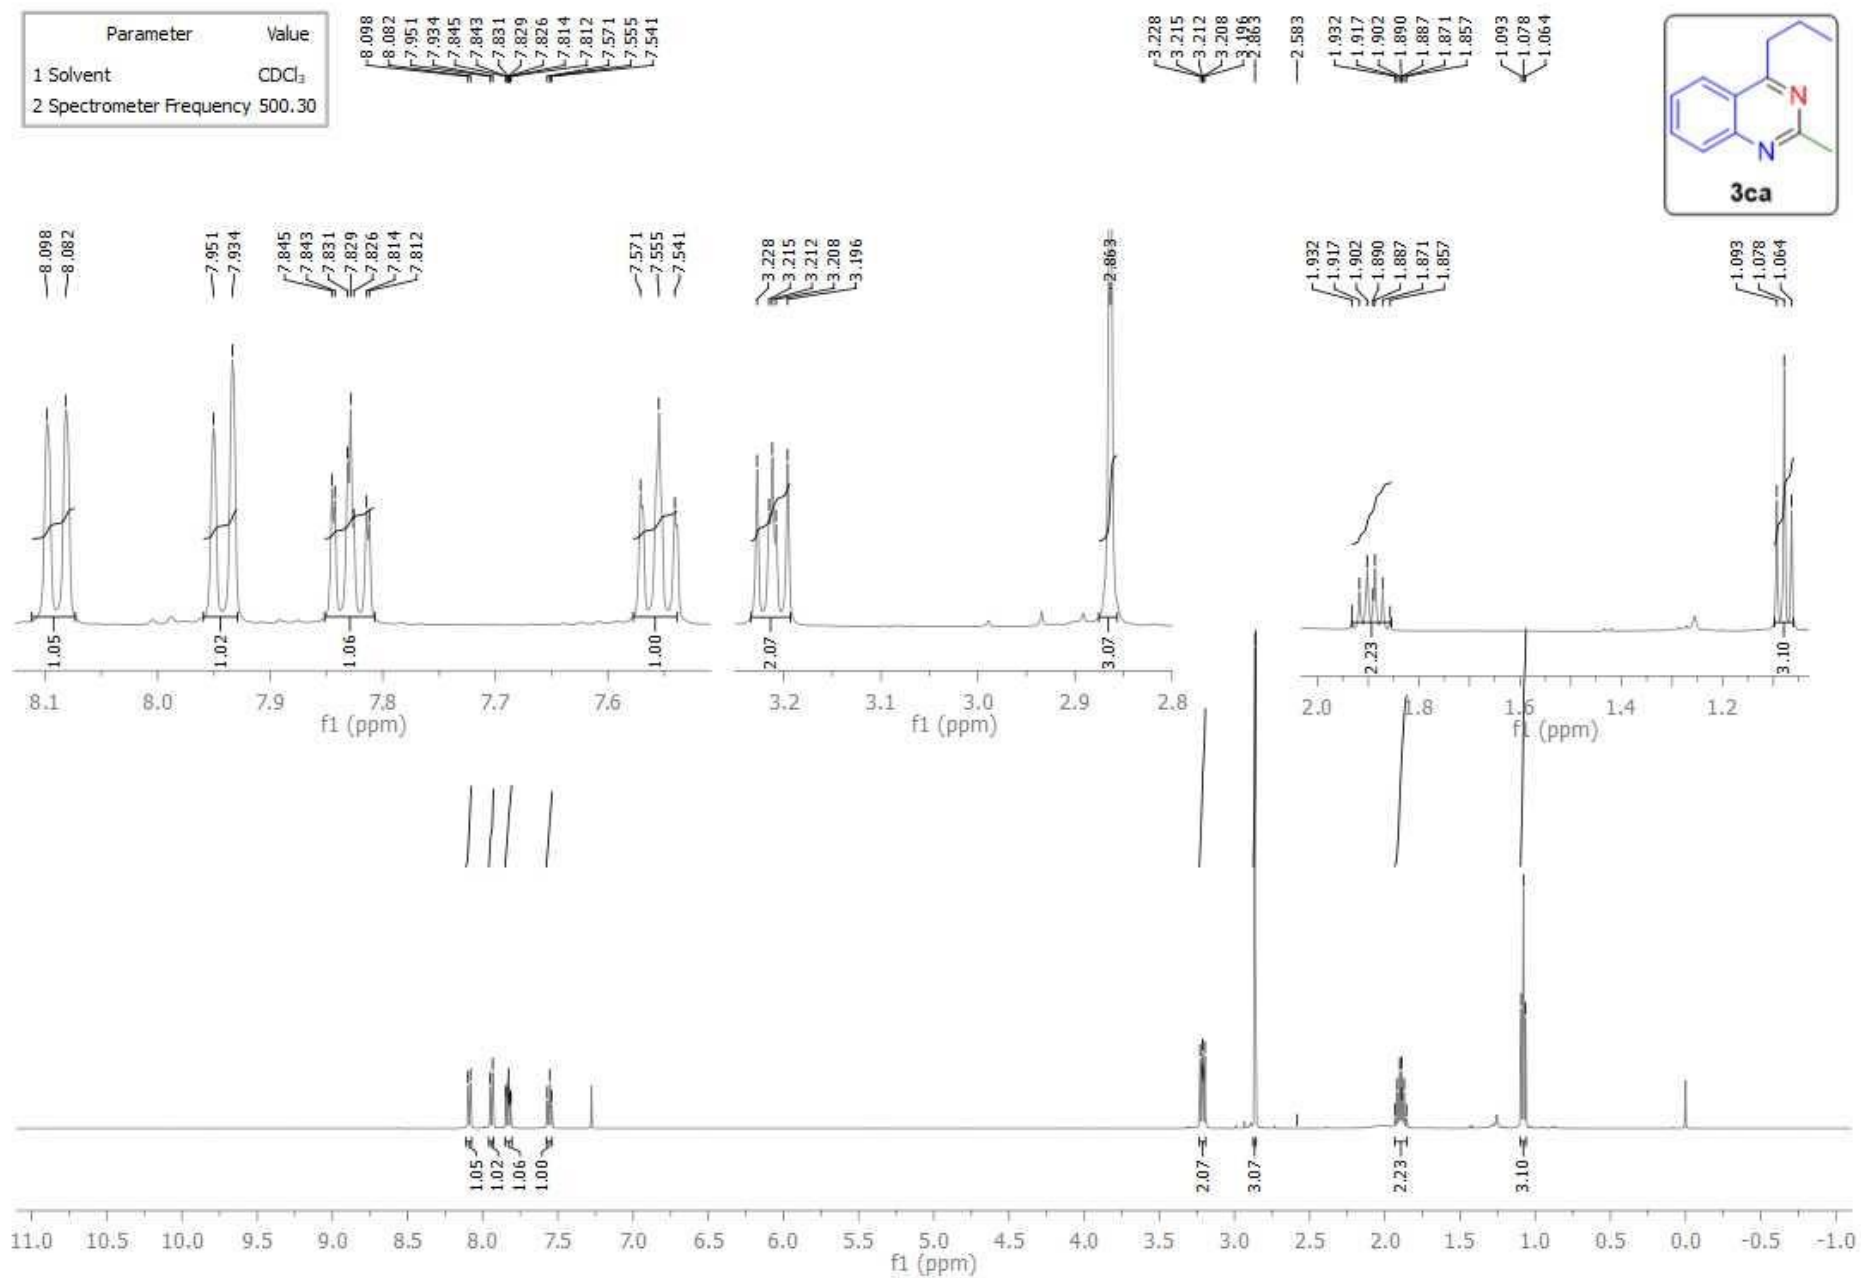

**Figure S10.** <sup>1</sup>H NMR Spectrum of 2-Methyl-4-propylquinazoline (**3ca**).

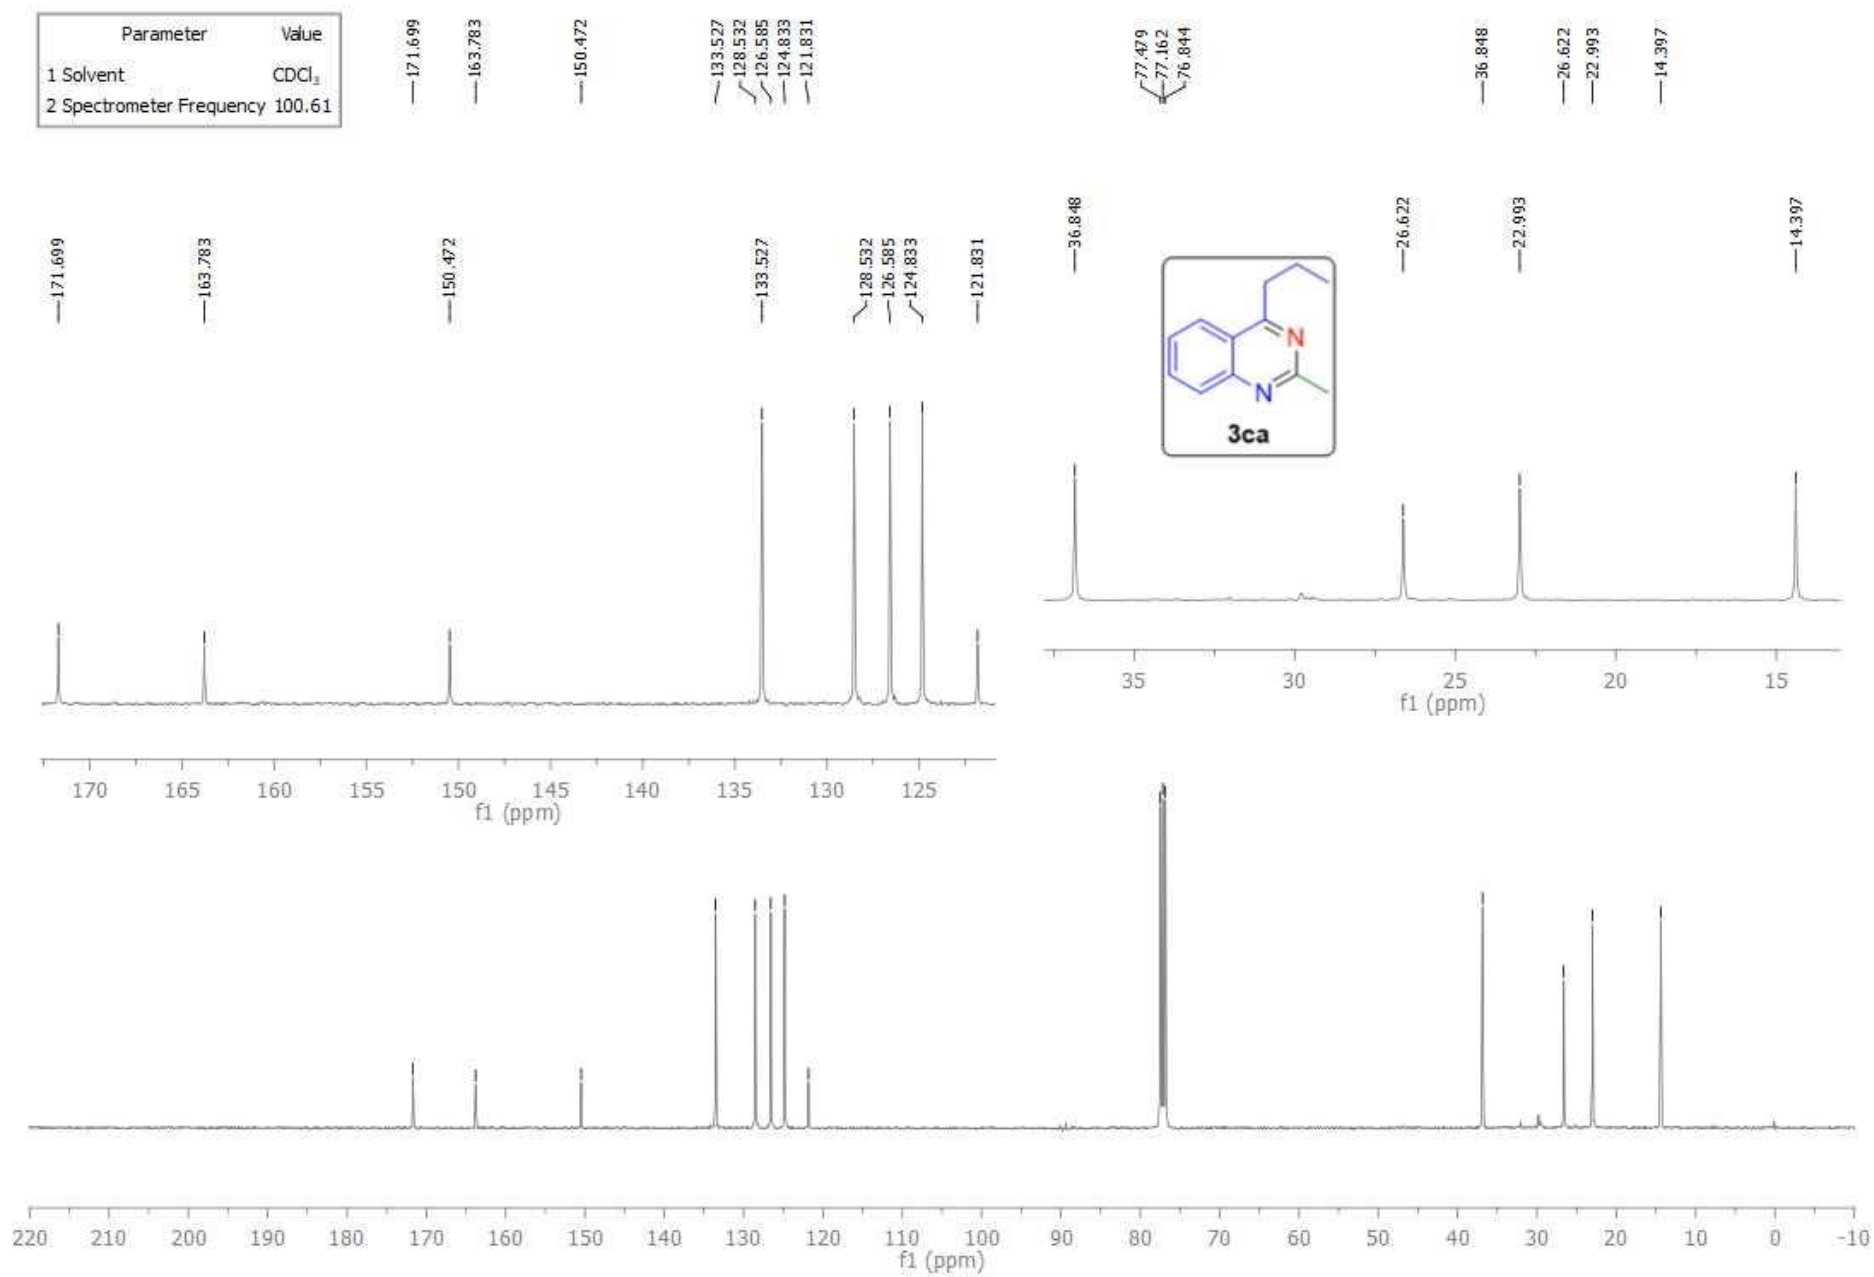

**Figure S11.** <sup>13</sup>C NMR Spectrum of 2-Methyl-4-propylquinazoline (**3ca**)



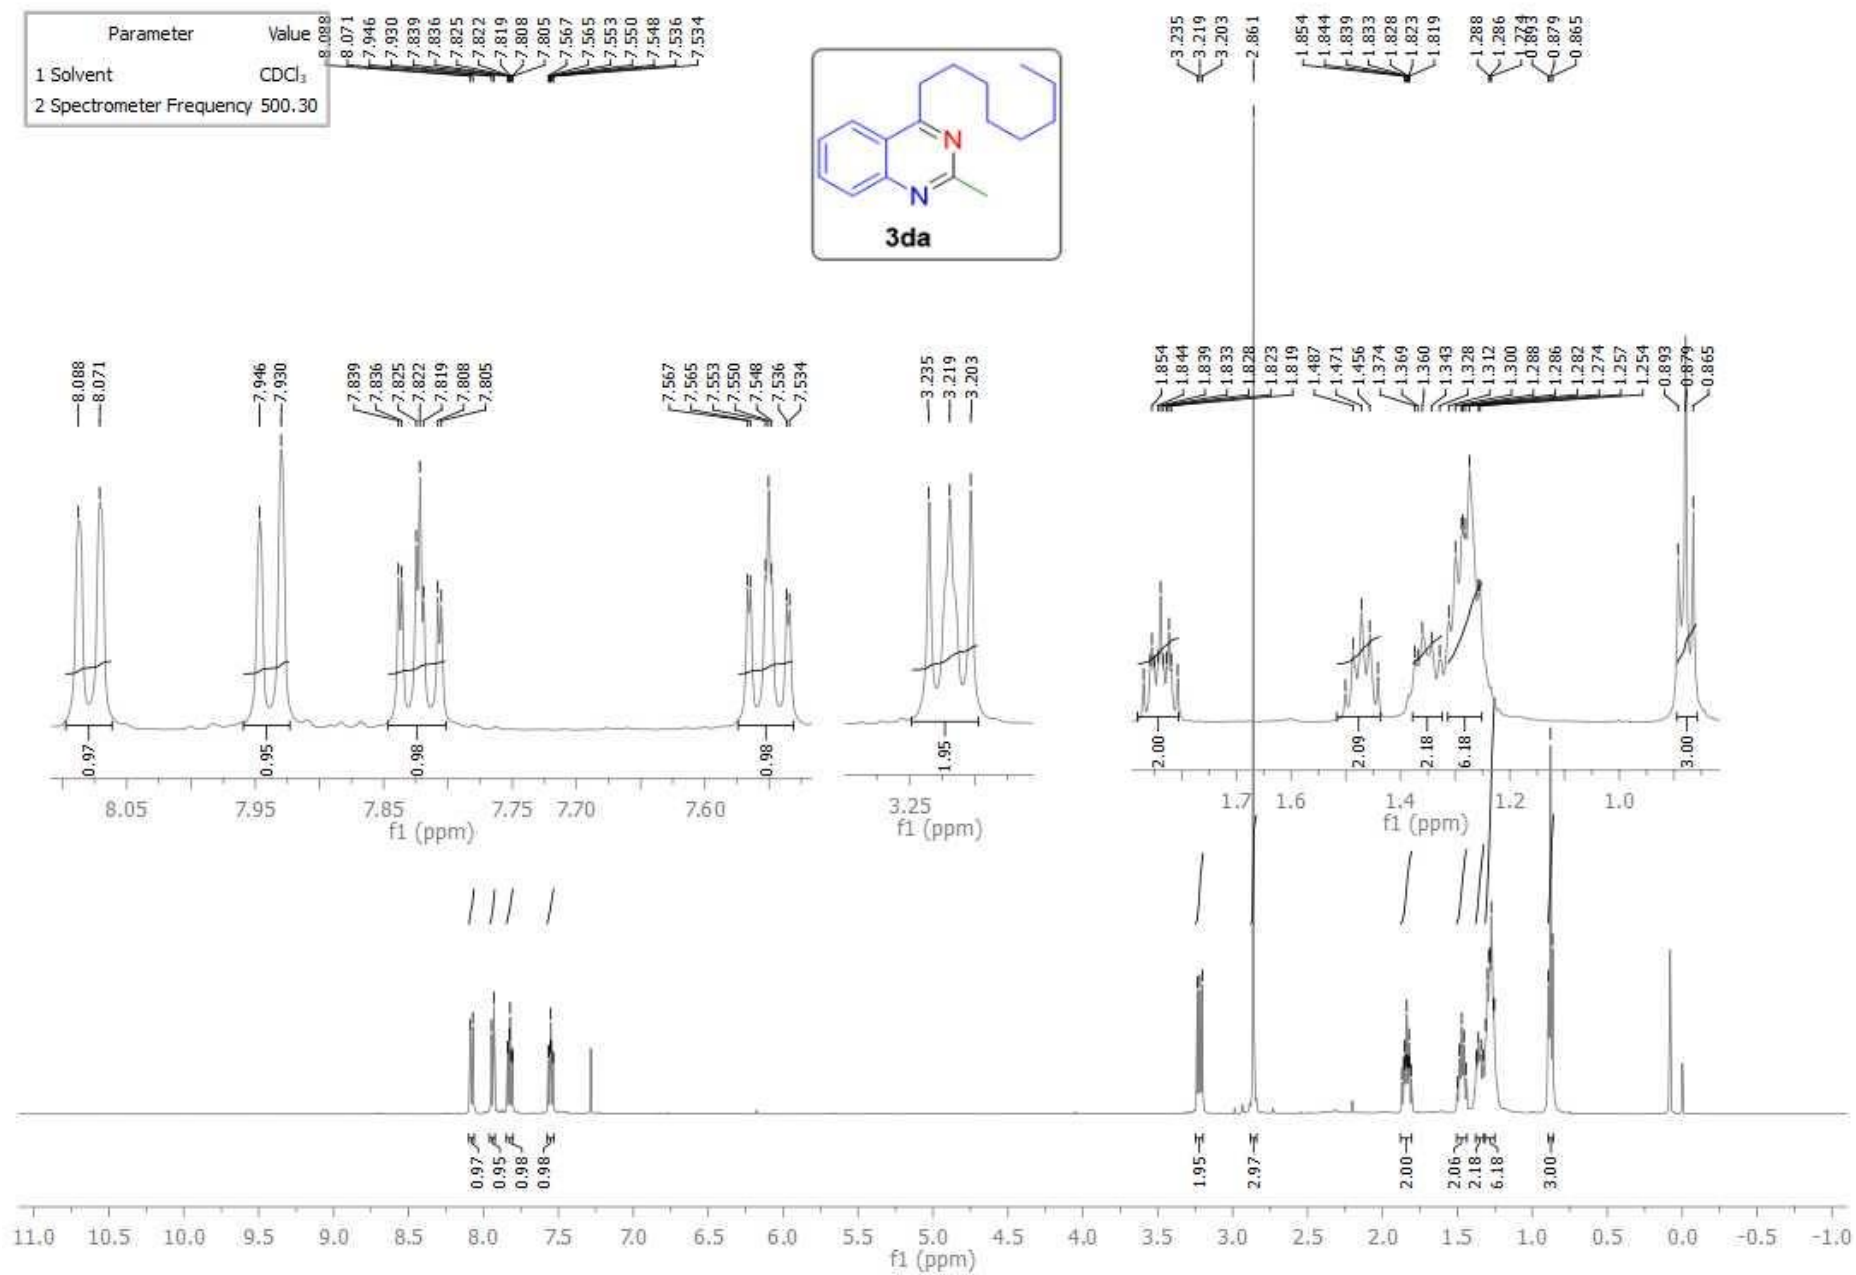

**Figure S12.** <sup>1</sup>H NMR Spectrum of 2-Methyl-4-octylquinazoline (**3da**)

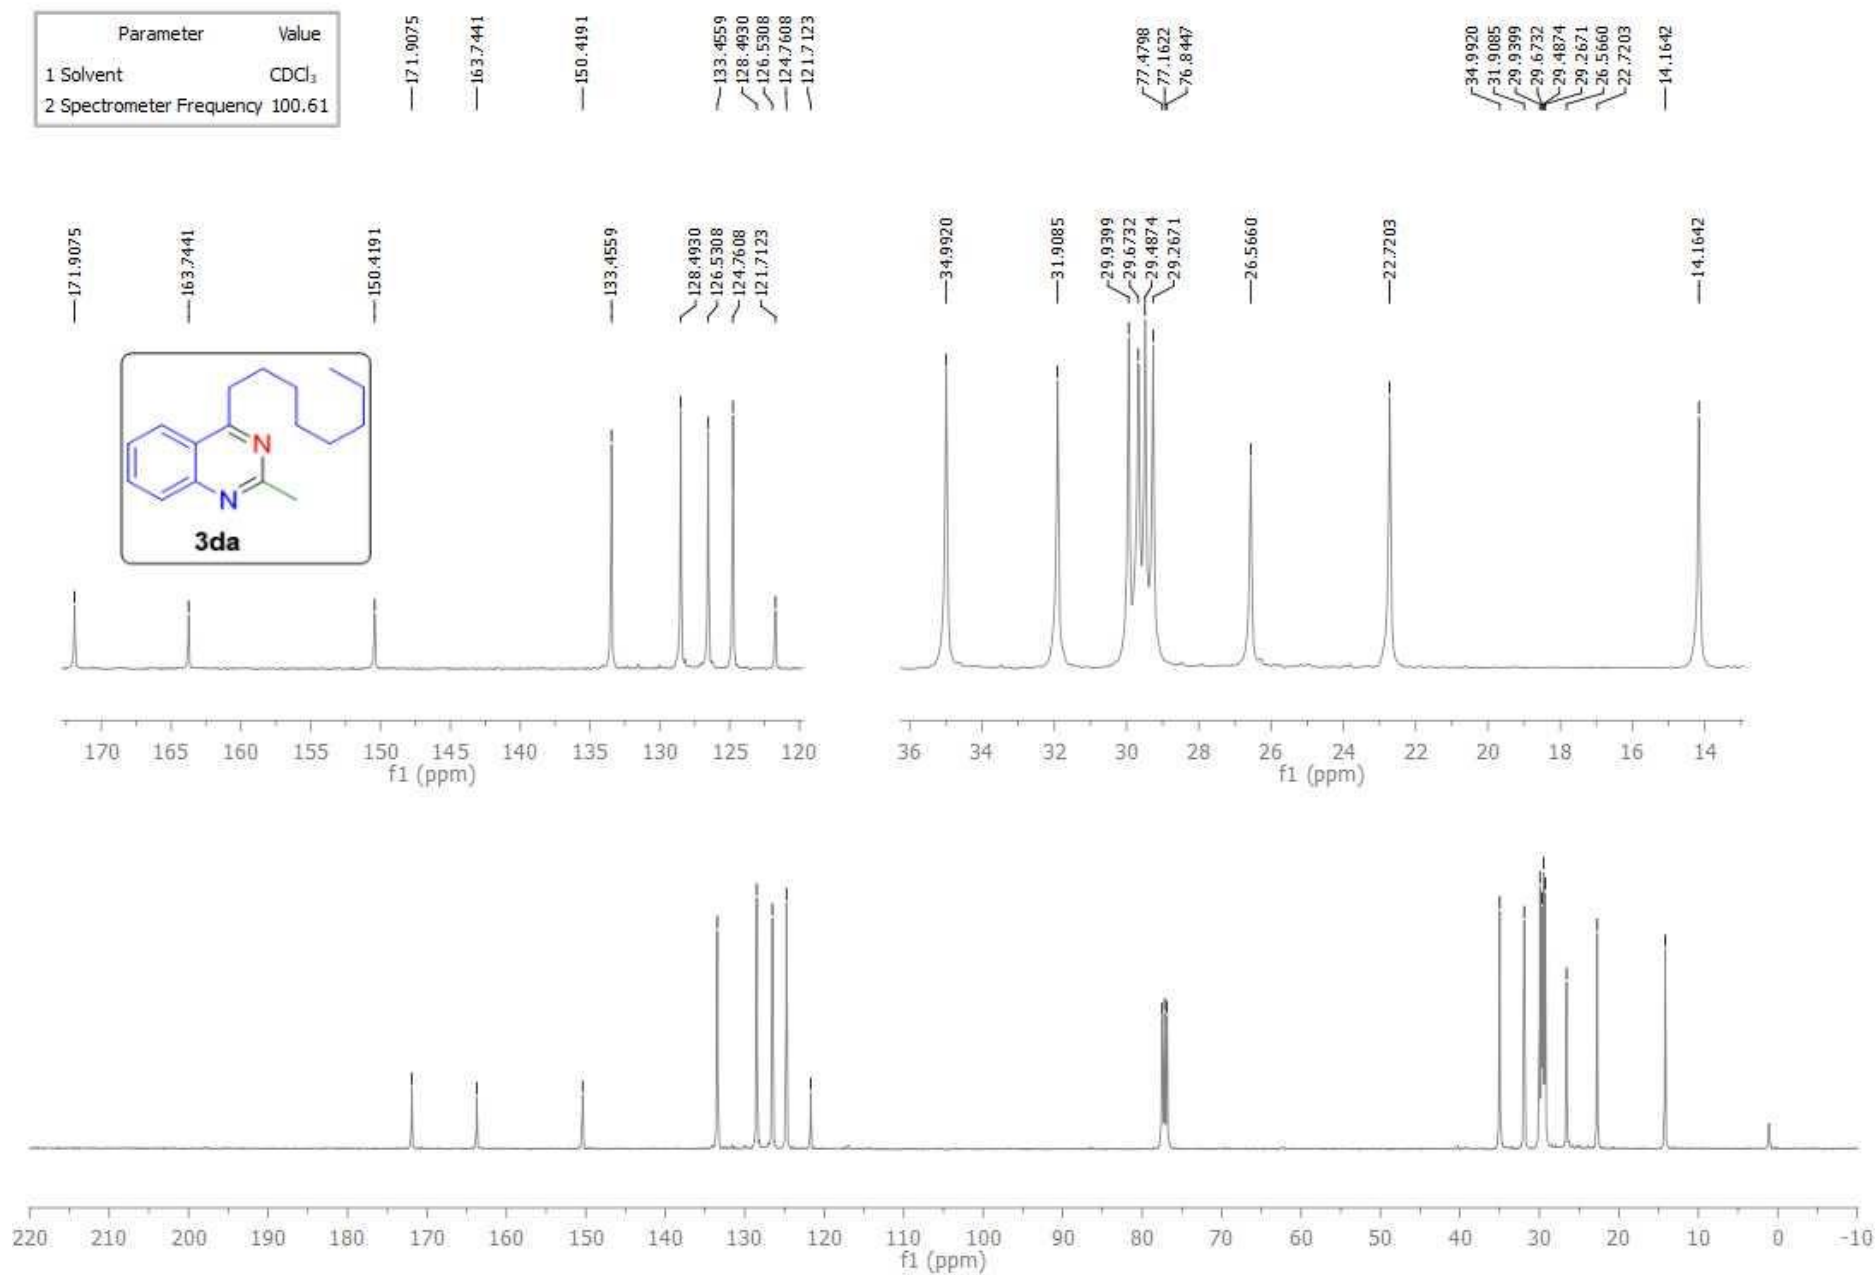

**Figure S13.**  $^{13}\text{C}$  NMR Spectrum of 2-Methyl-4-octylquinazoline (**3da**)

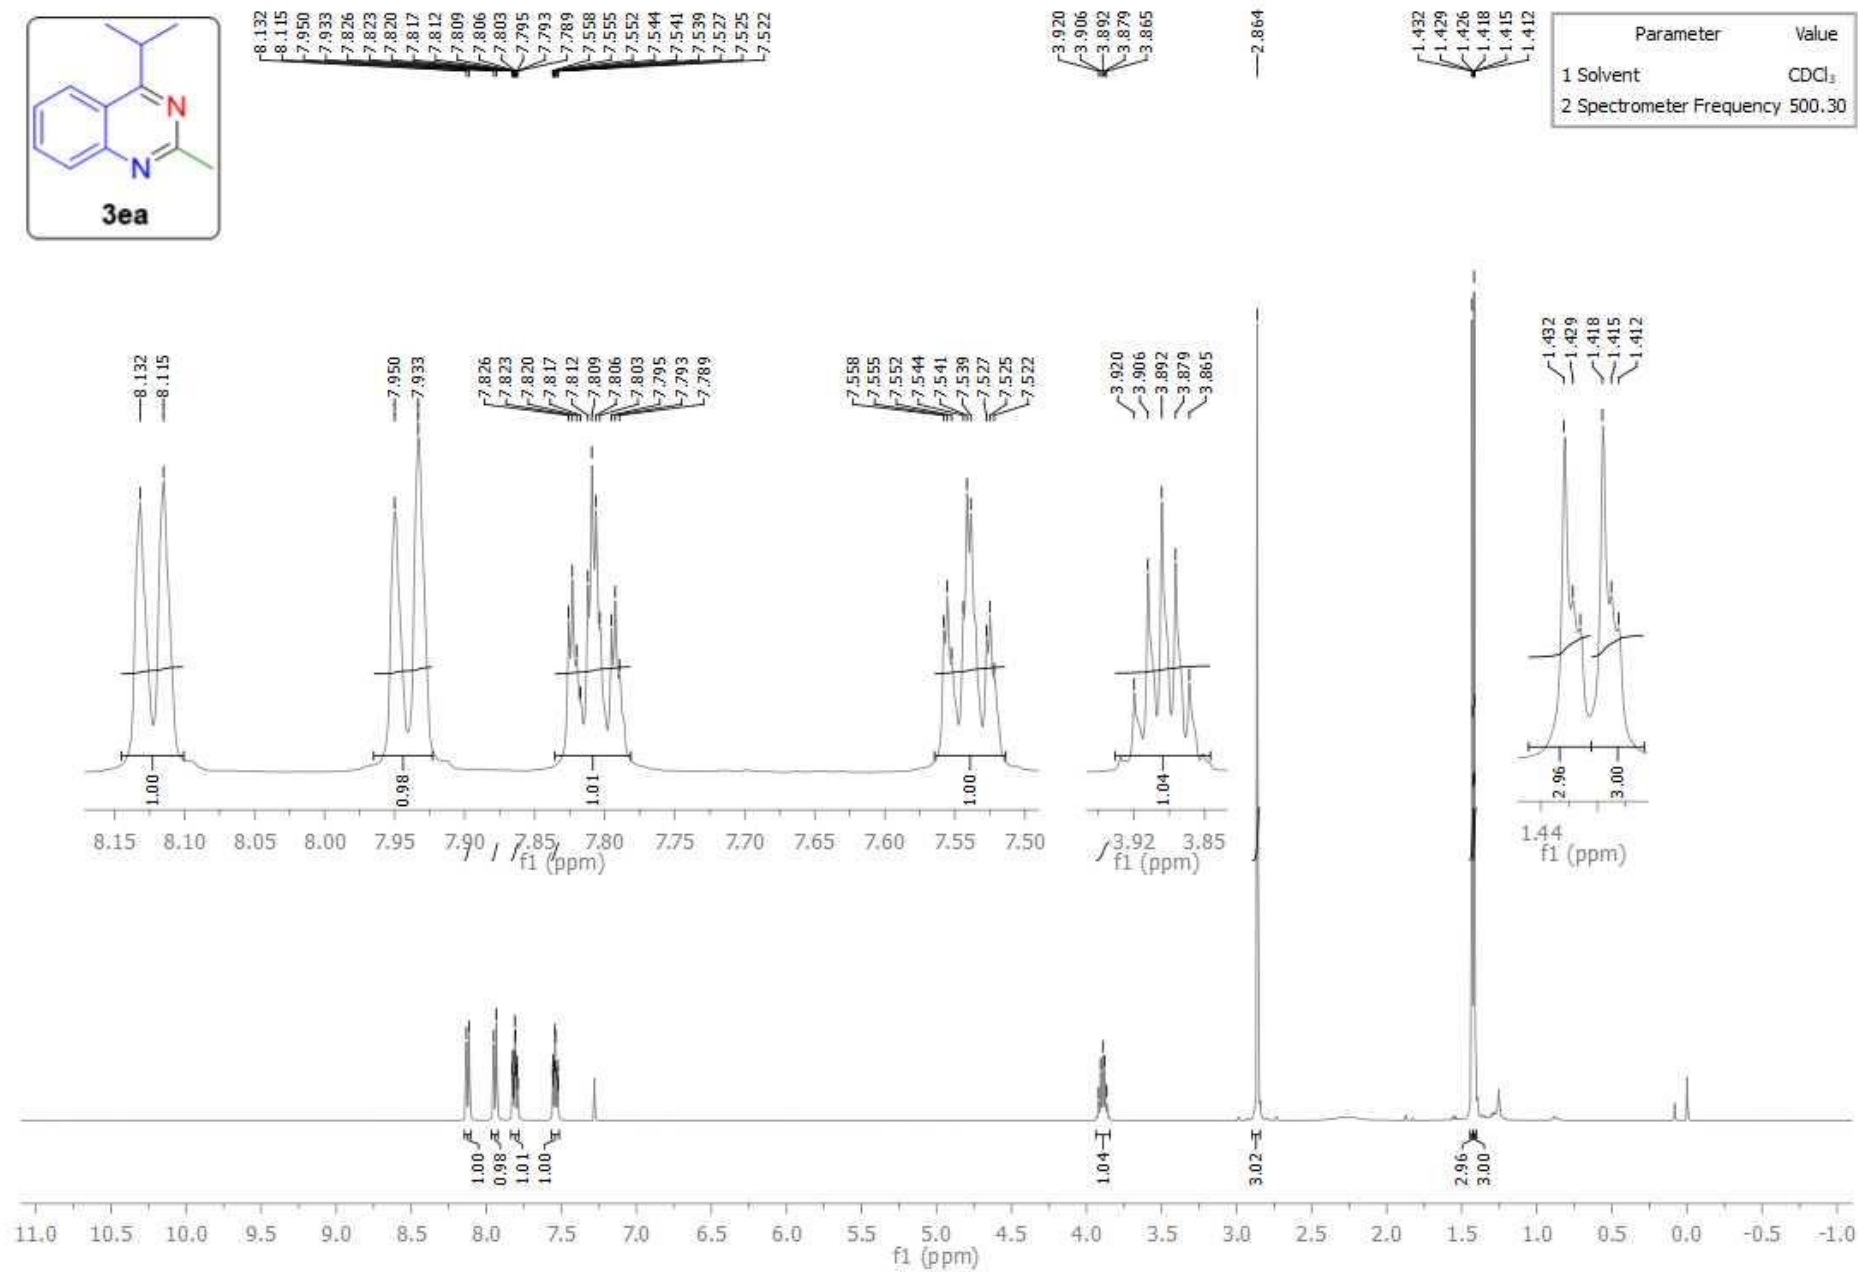

**Figure S14.** <sup>1</sup>H NMR Spectrum of 4-Isopropyl-2-methylquinazoline (**3ea**)

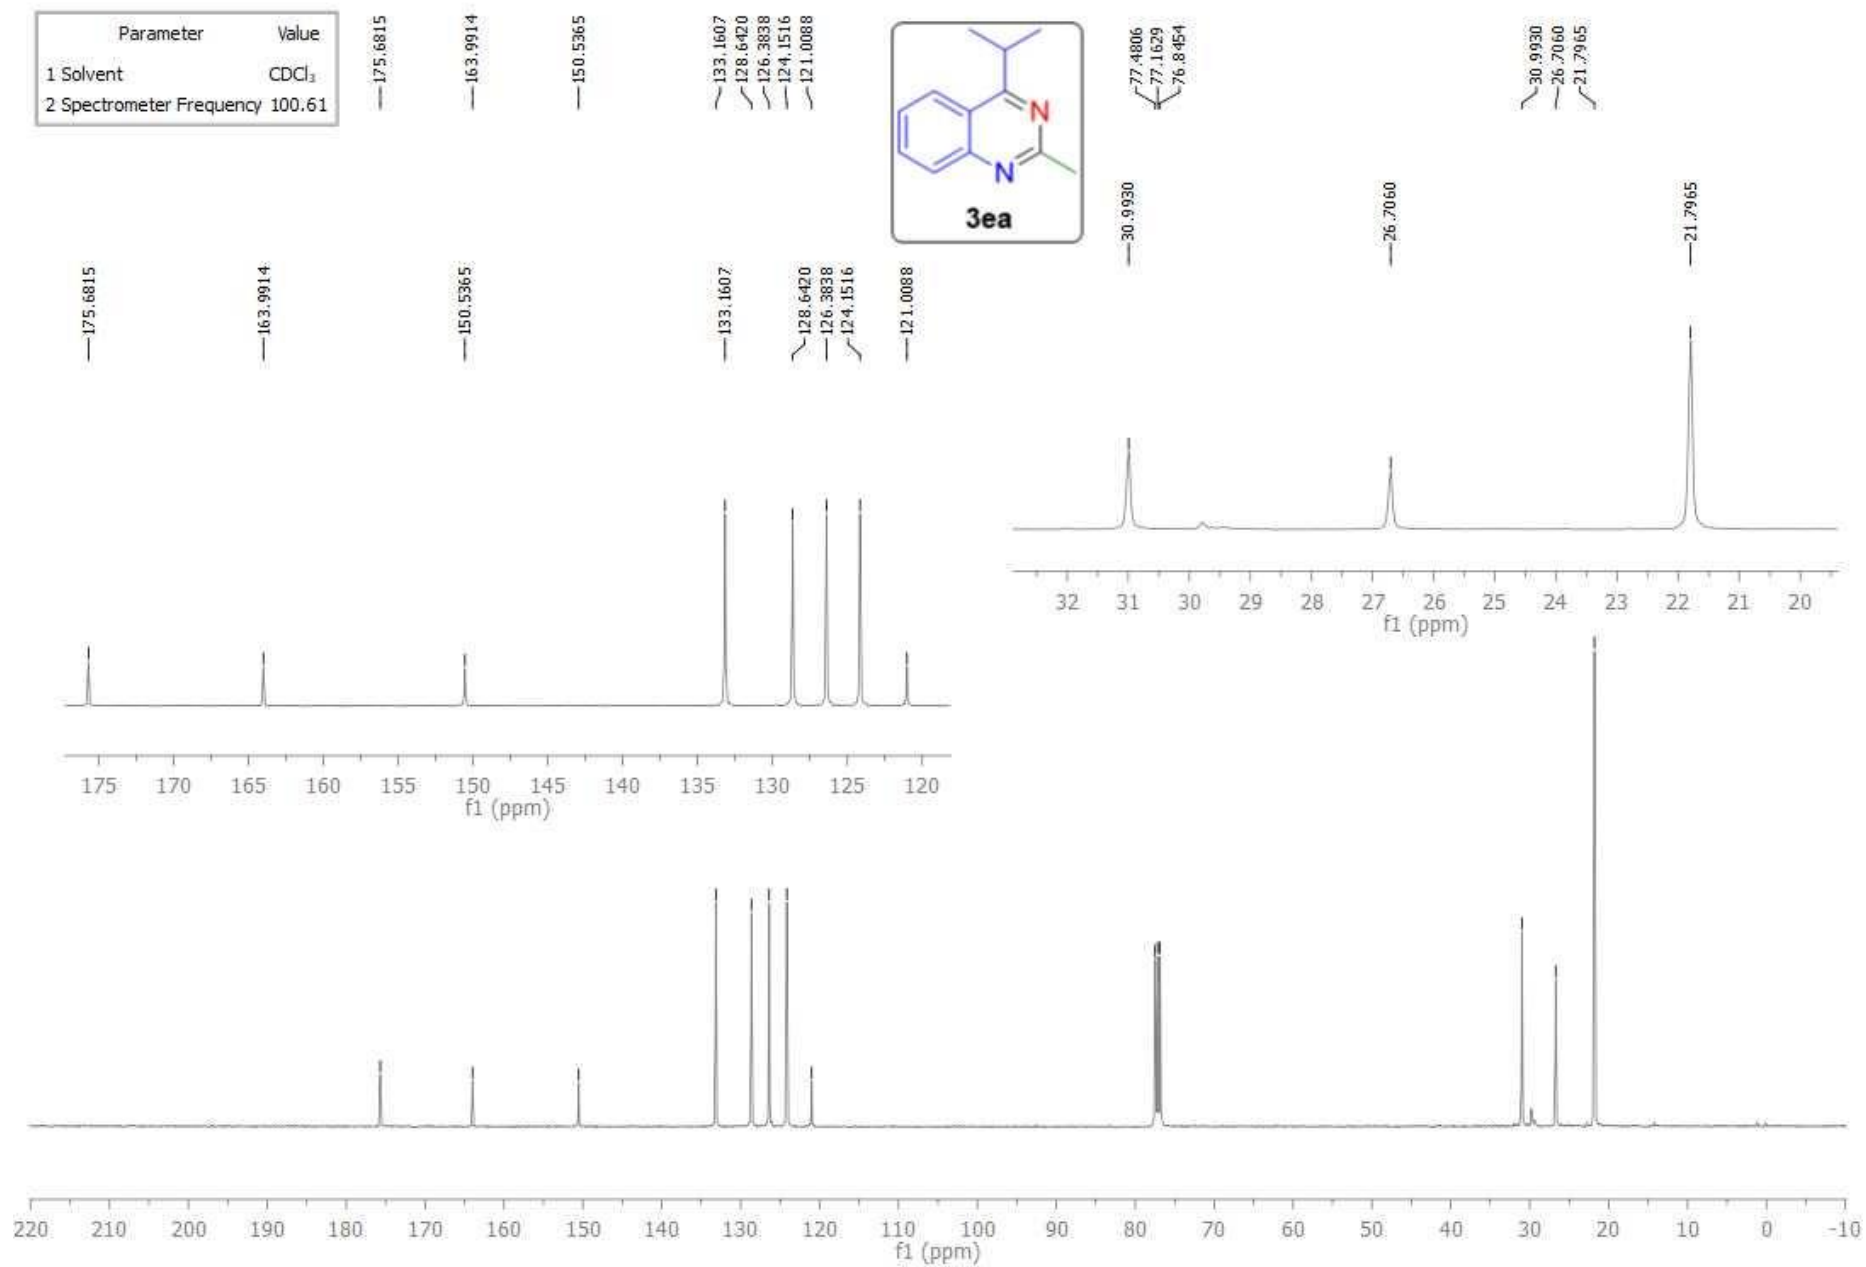

**Figure S15.** <sup>13</sup>C NMR Spectrum of 4-Isopropyl-2-methylquinazoline (**3ea**)

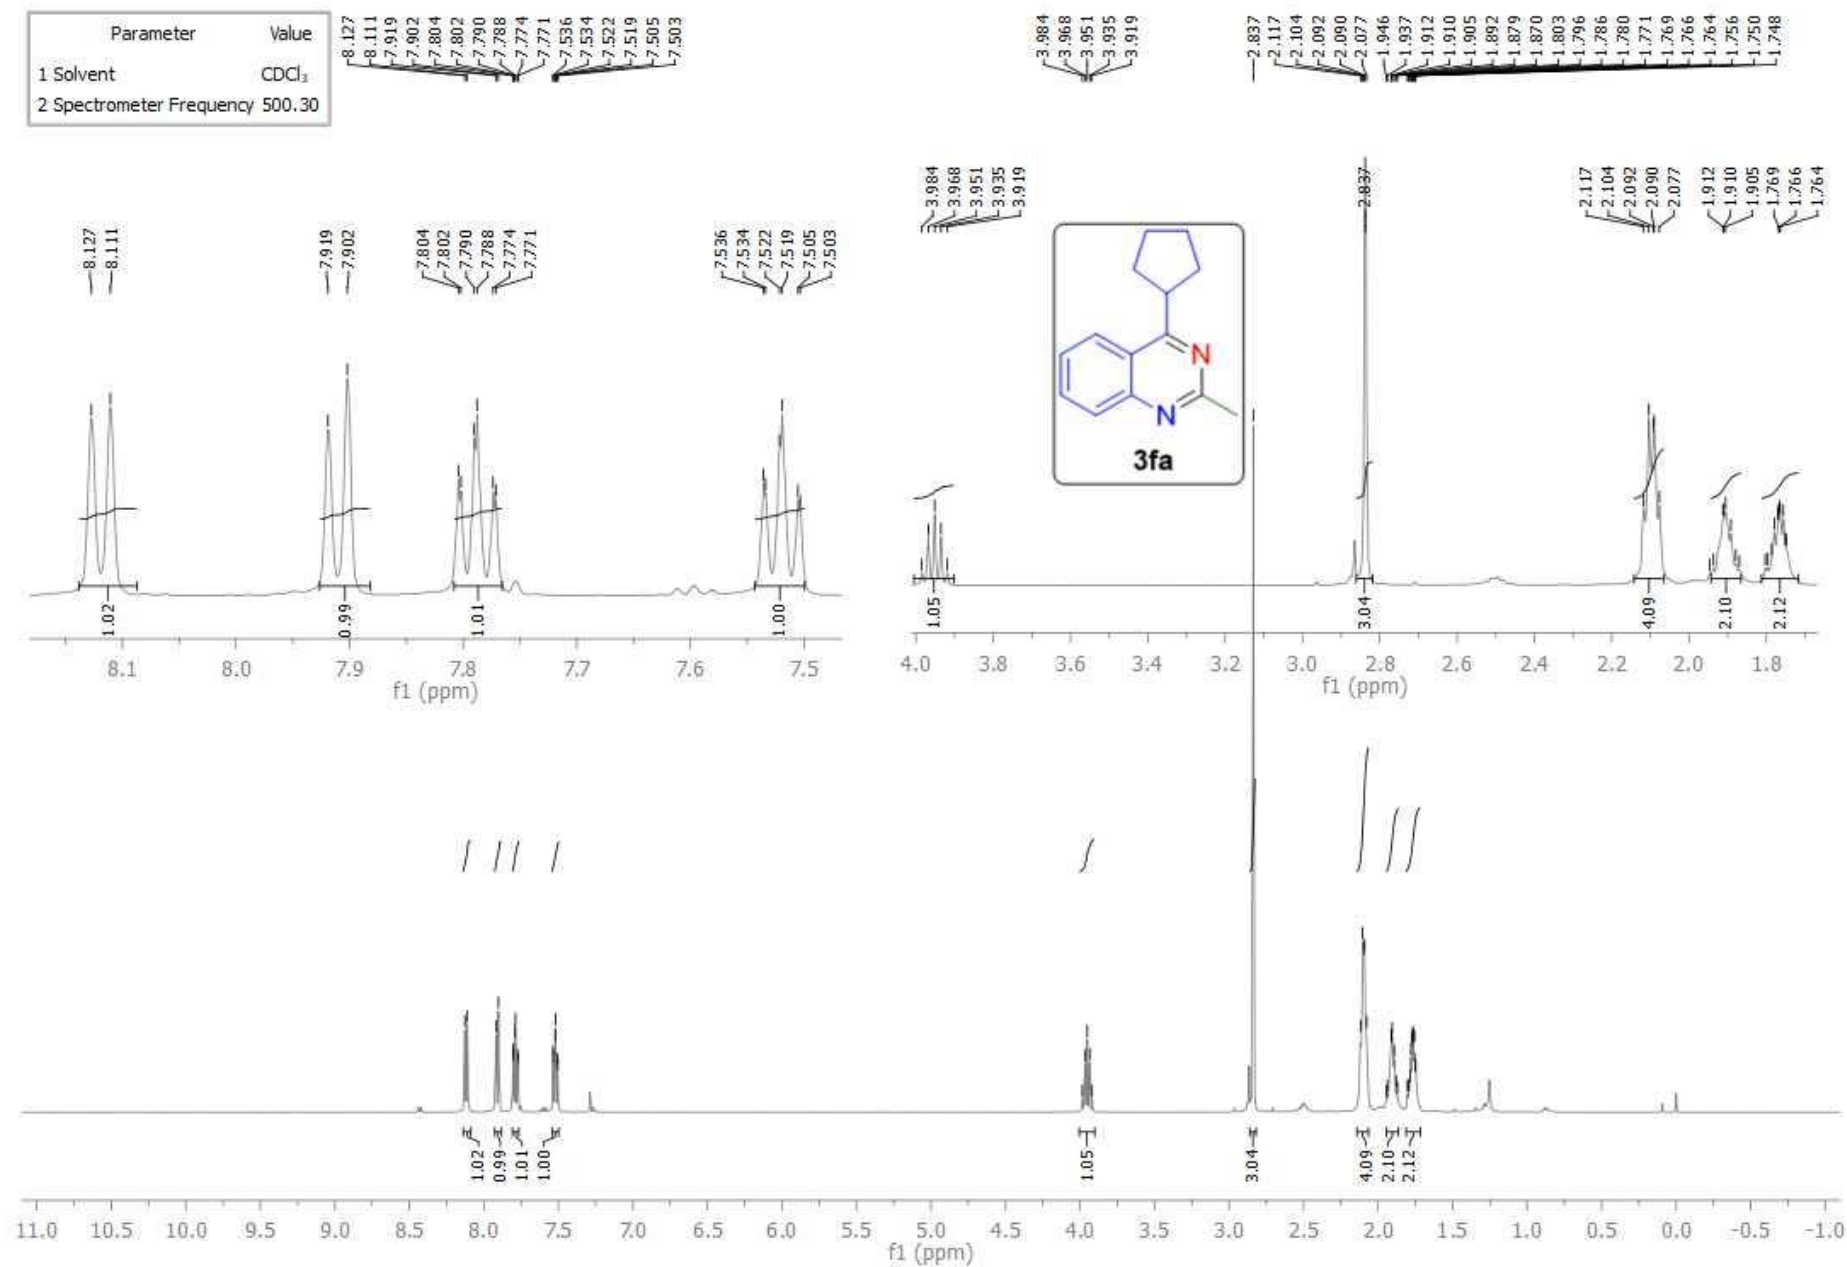

**Figure S16.** <sup>1</sup>H NMR Spectrum of 4-Cyclopentyl-2-methylquinazoline (**3fa**)

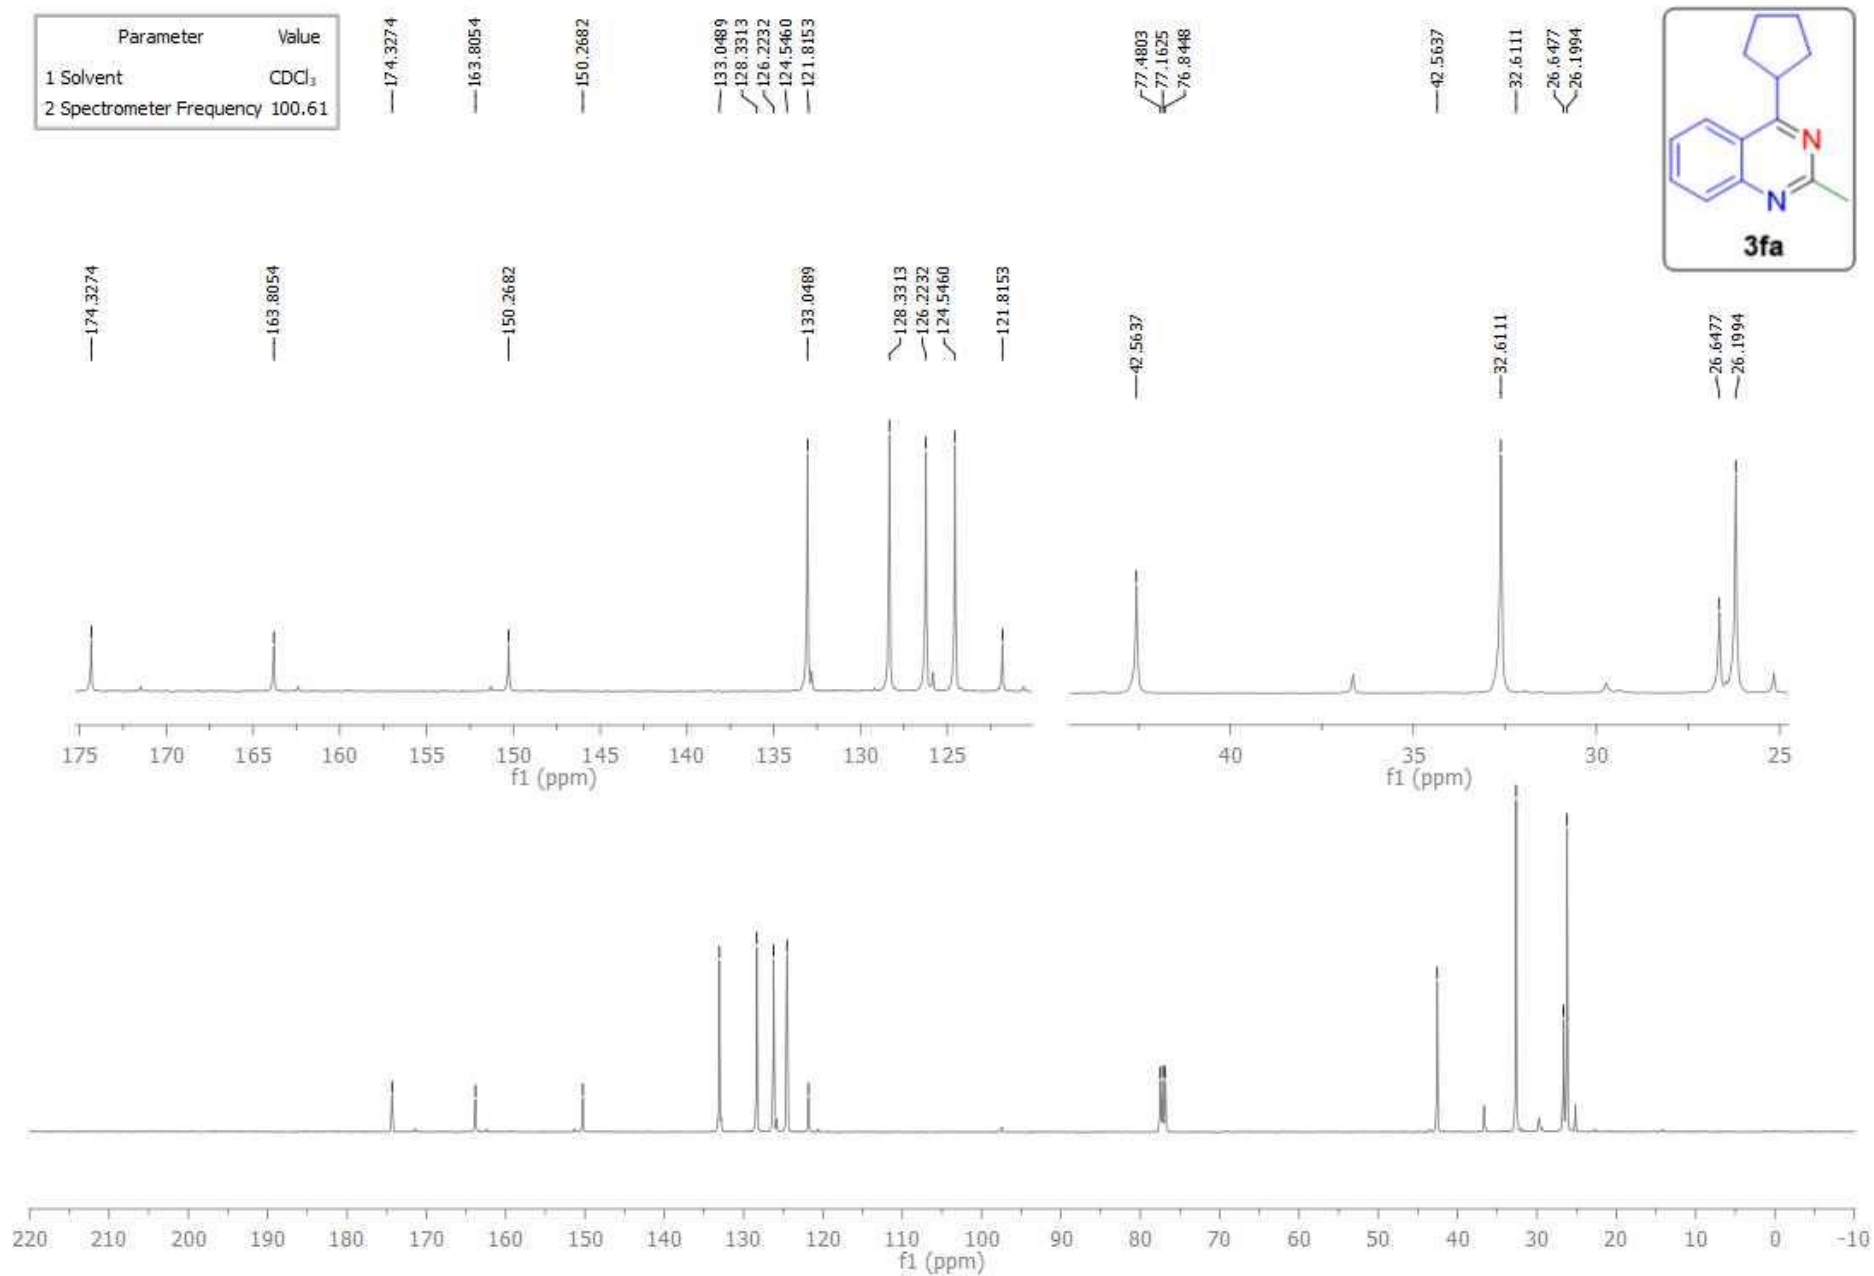

**Figure S17.** <sup>13</sup>C NMR Spectrum of 4-Cyclopentyl-2-methylquinazoline (**3fa**)

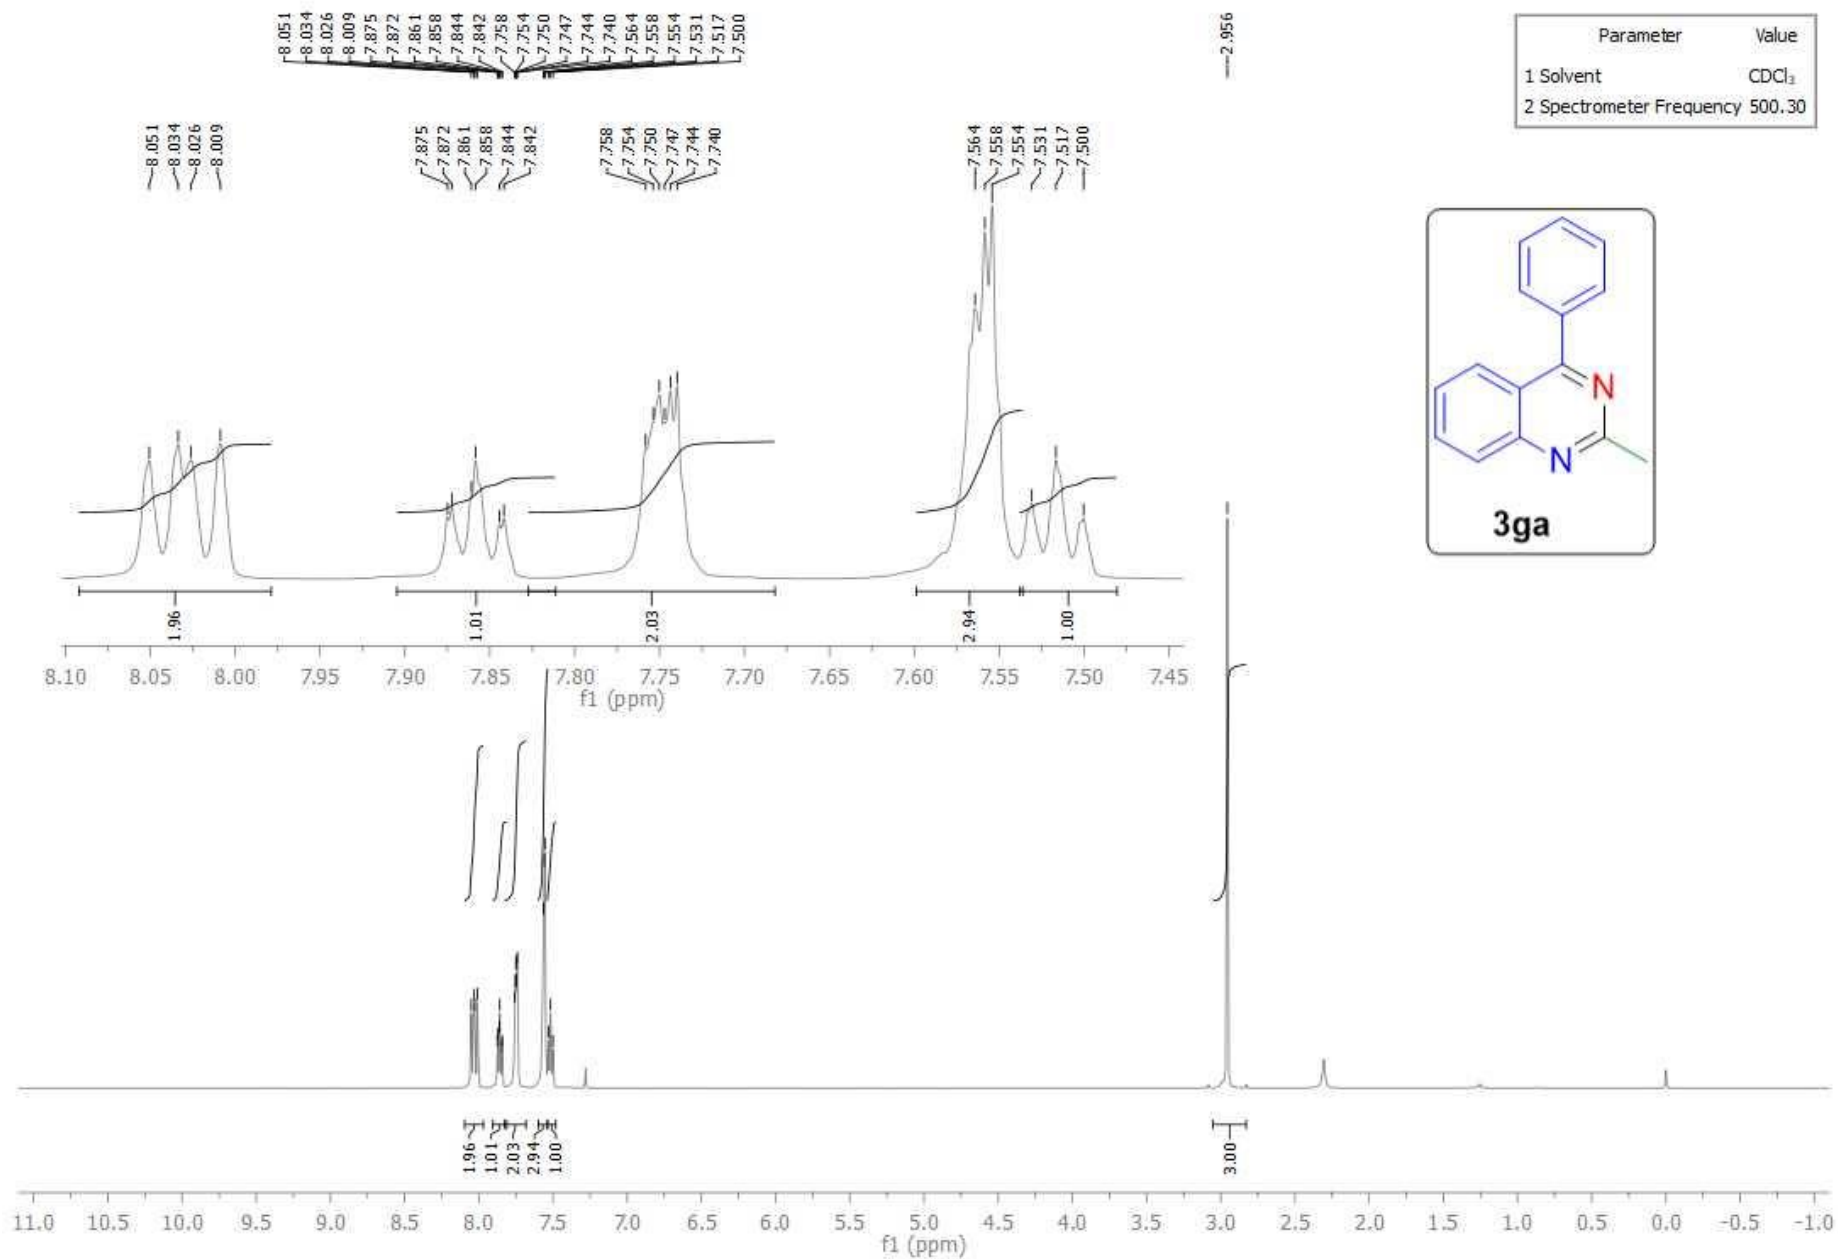

**Figure S18.** <sup>1</sup>H NMR Spectrum of 2-Methyl-4-phenylquinazoline (**3ga**)

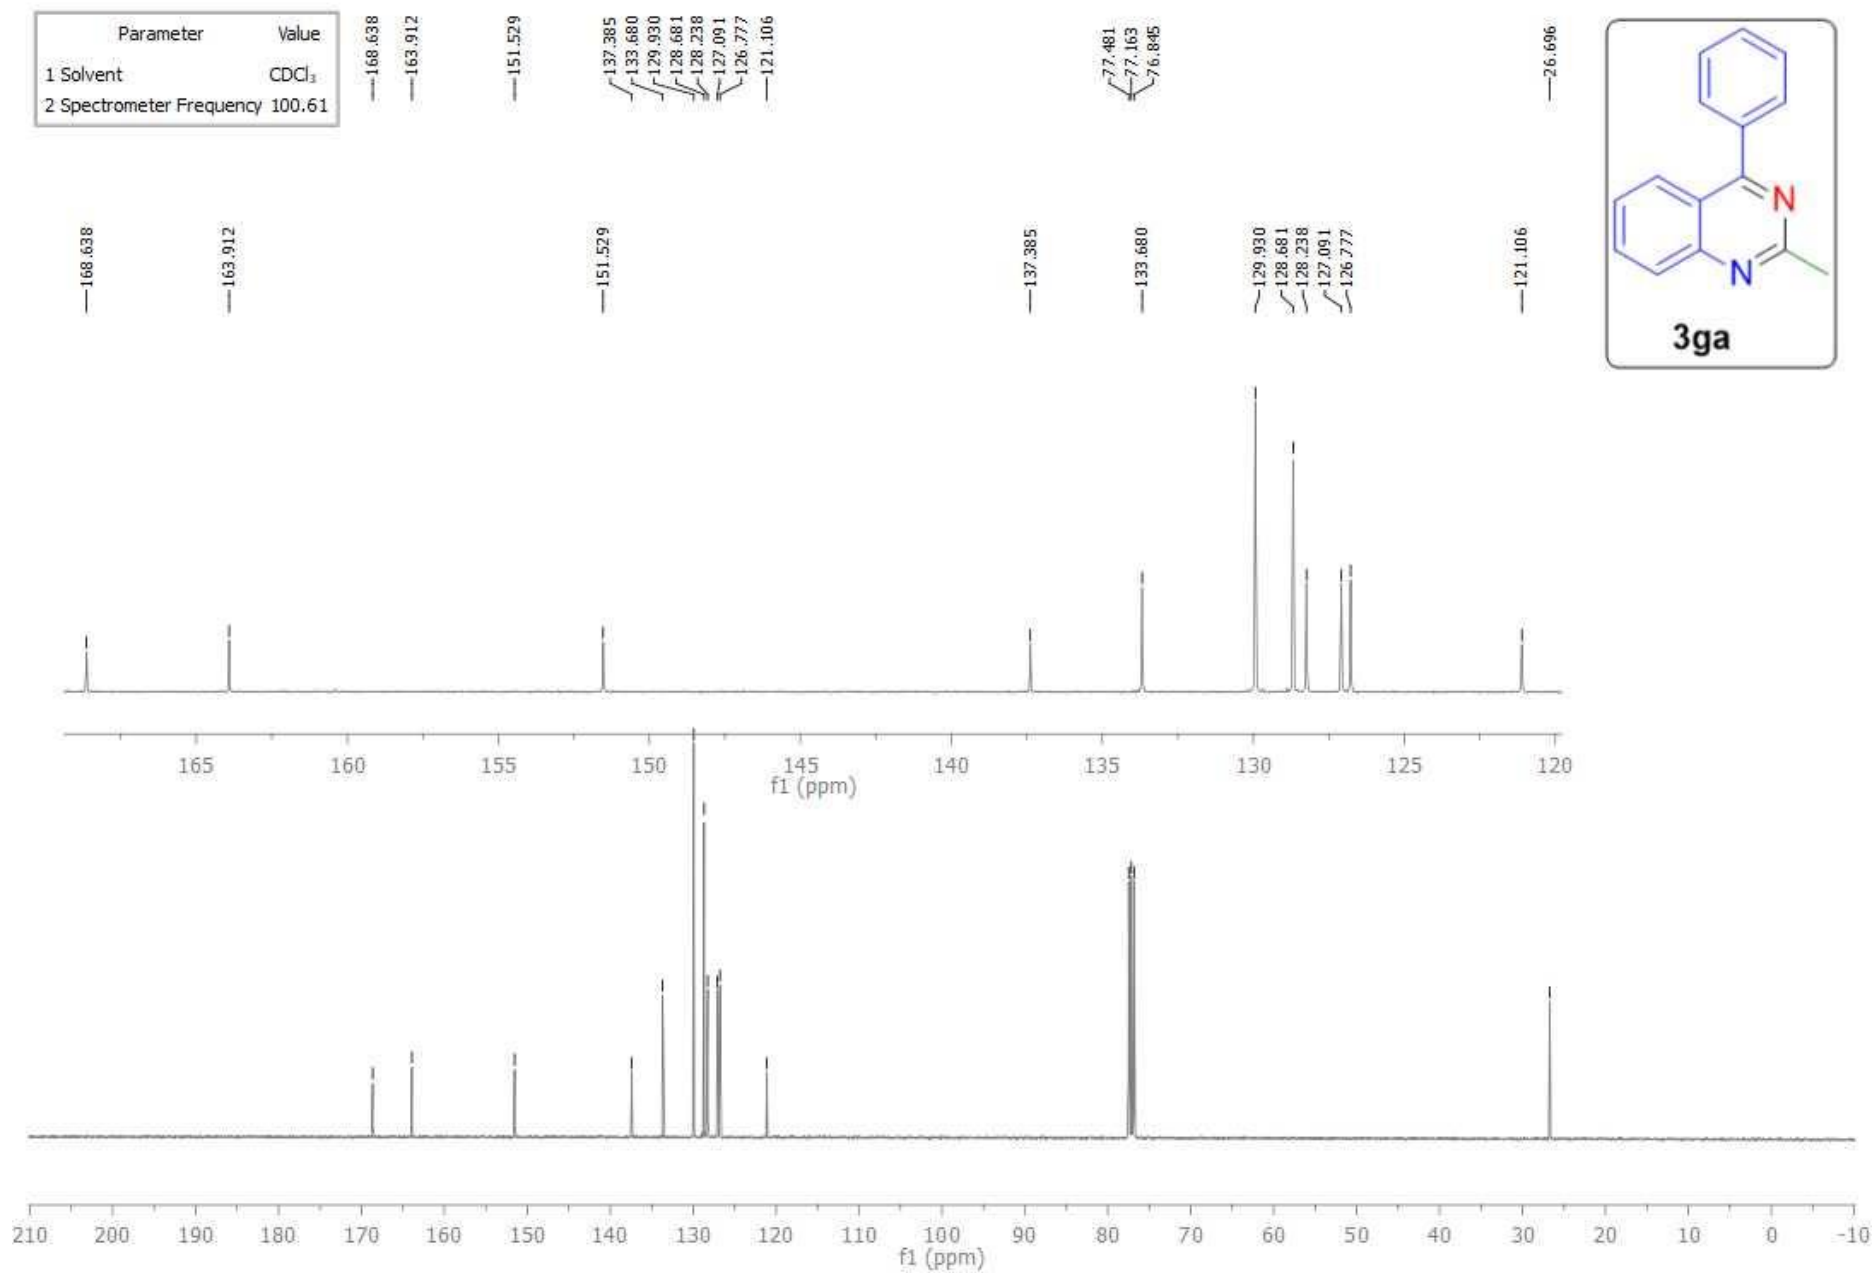

**Figure S19.** <sup>13</sup>C NMR Spectrum of 2-Methyl-4-phenylquinazoline (**3ga**)



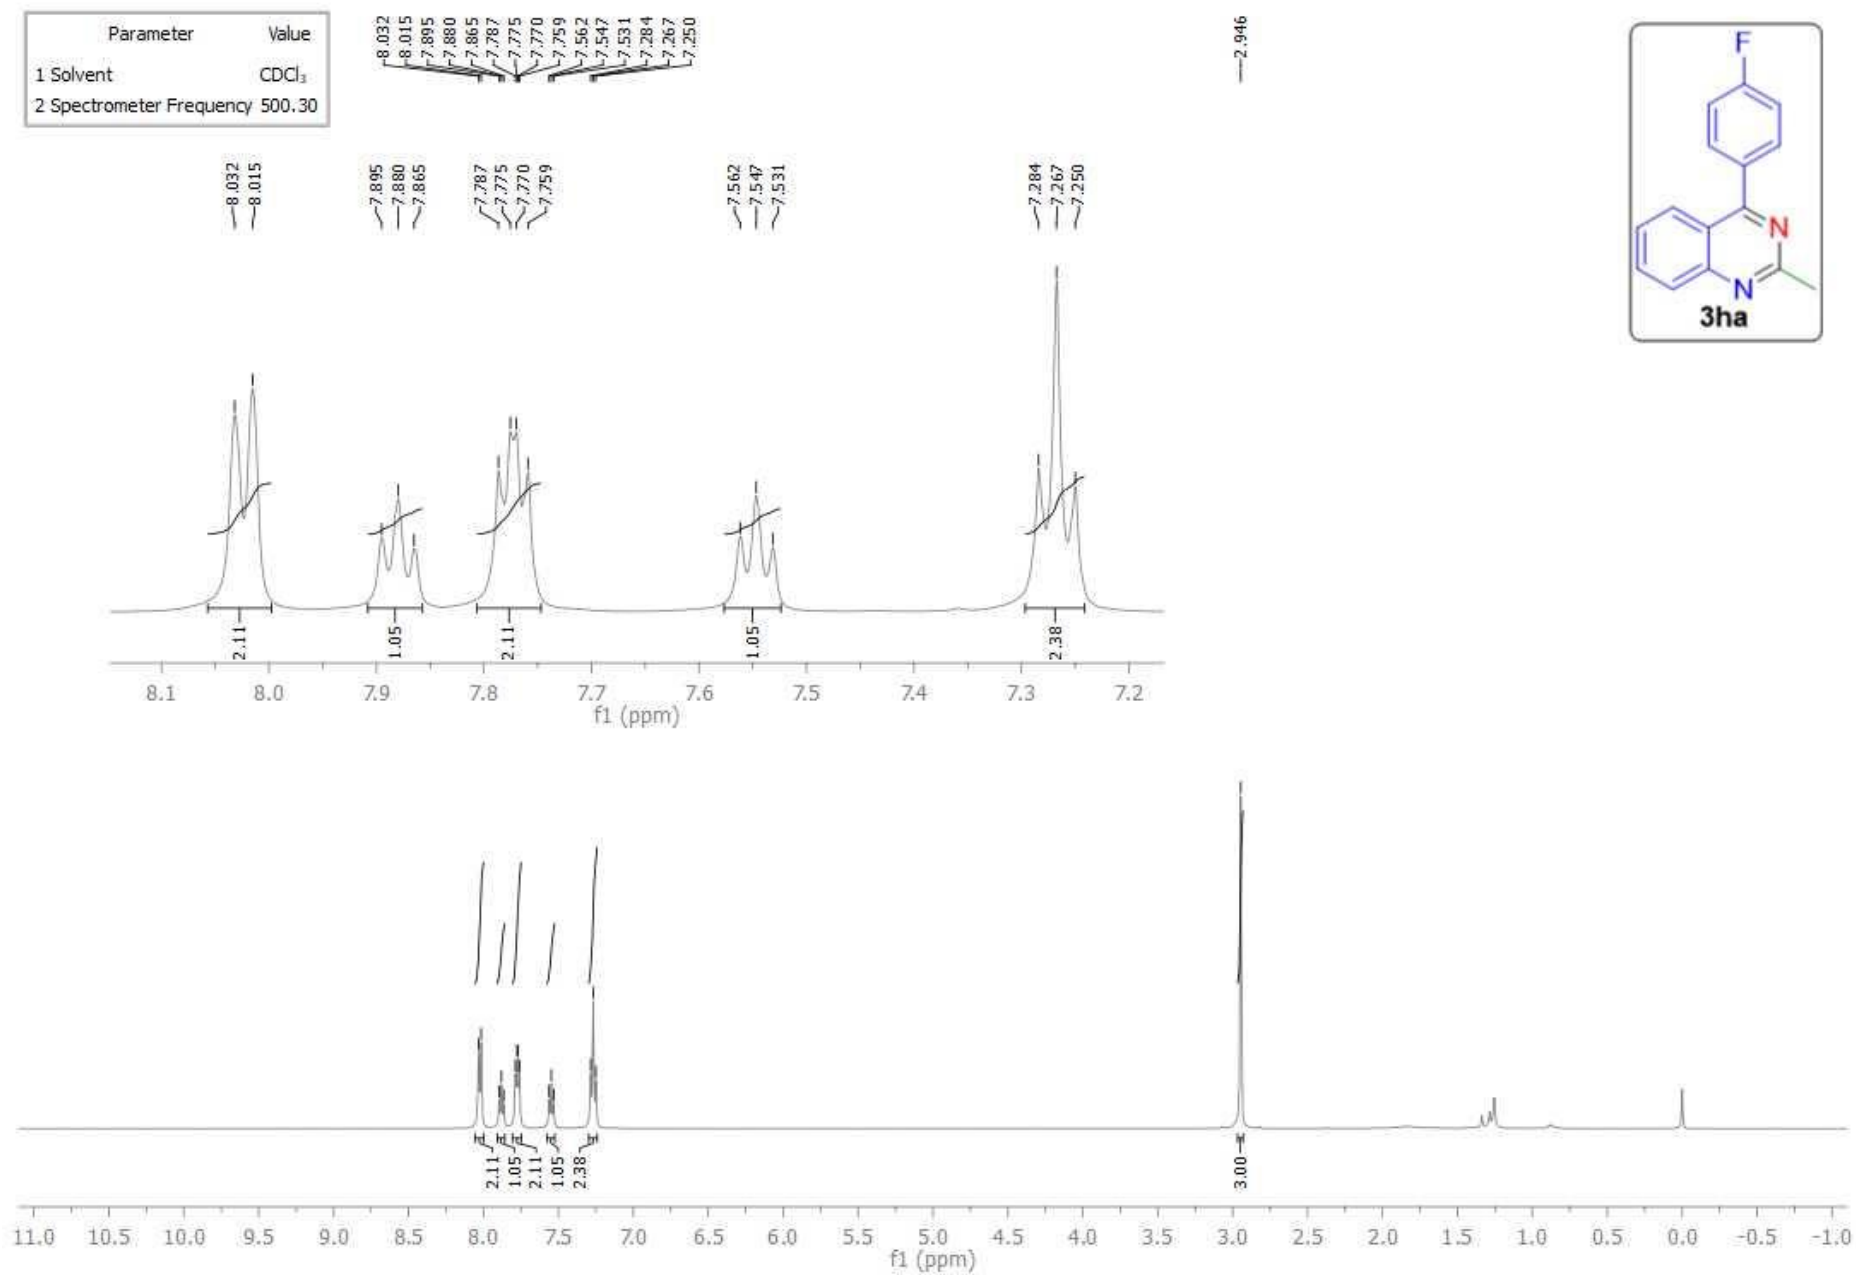

**Figure S20.** <sup>1</sup>H NMR Spectrum of 4-(4-Fluorophenyl)-2-methylquinazoline (**3ha**)

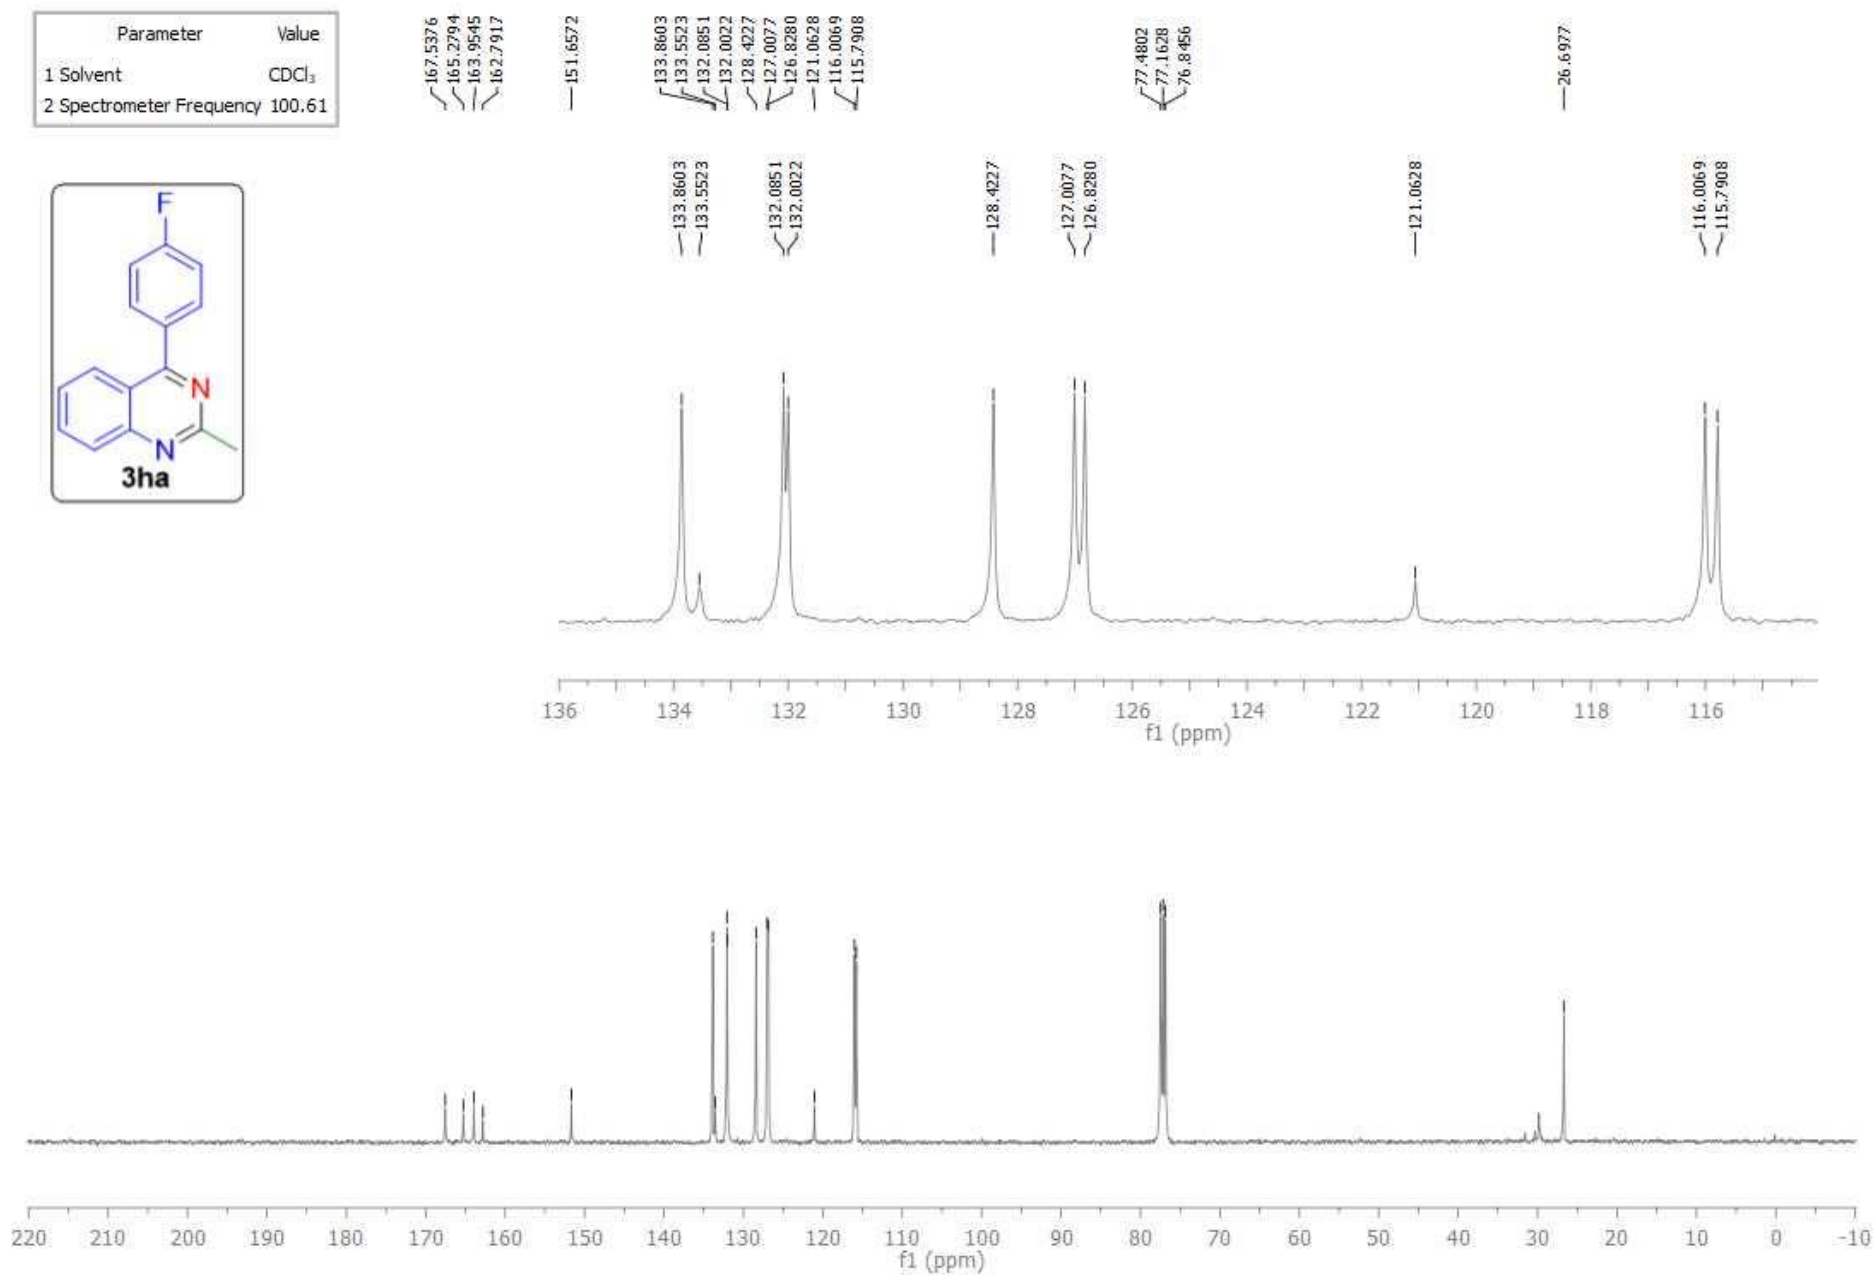

**Figure S21.** <sup>13</sup>C NMR Spectrum of 4-(4-Fluorophenyl)-2-methylquinazoline (**3ha**)

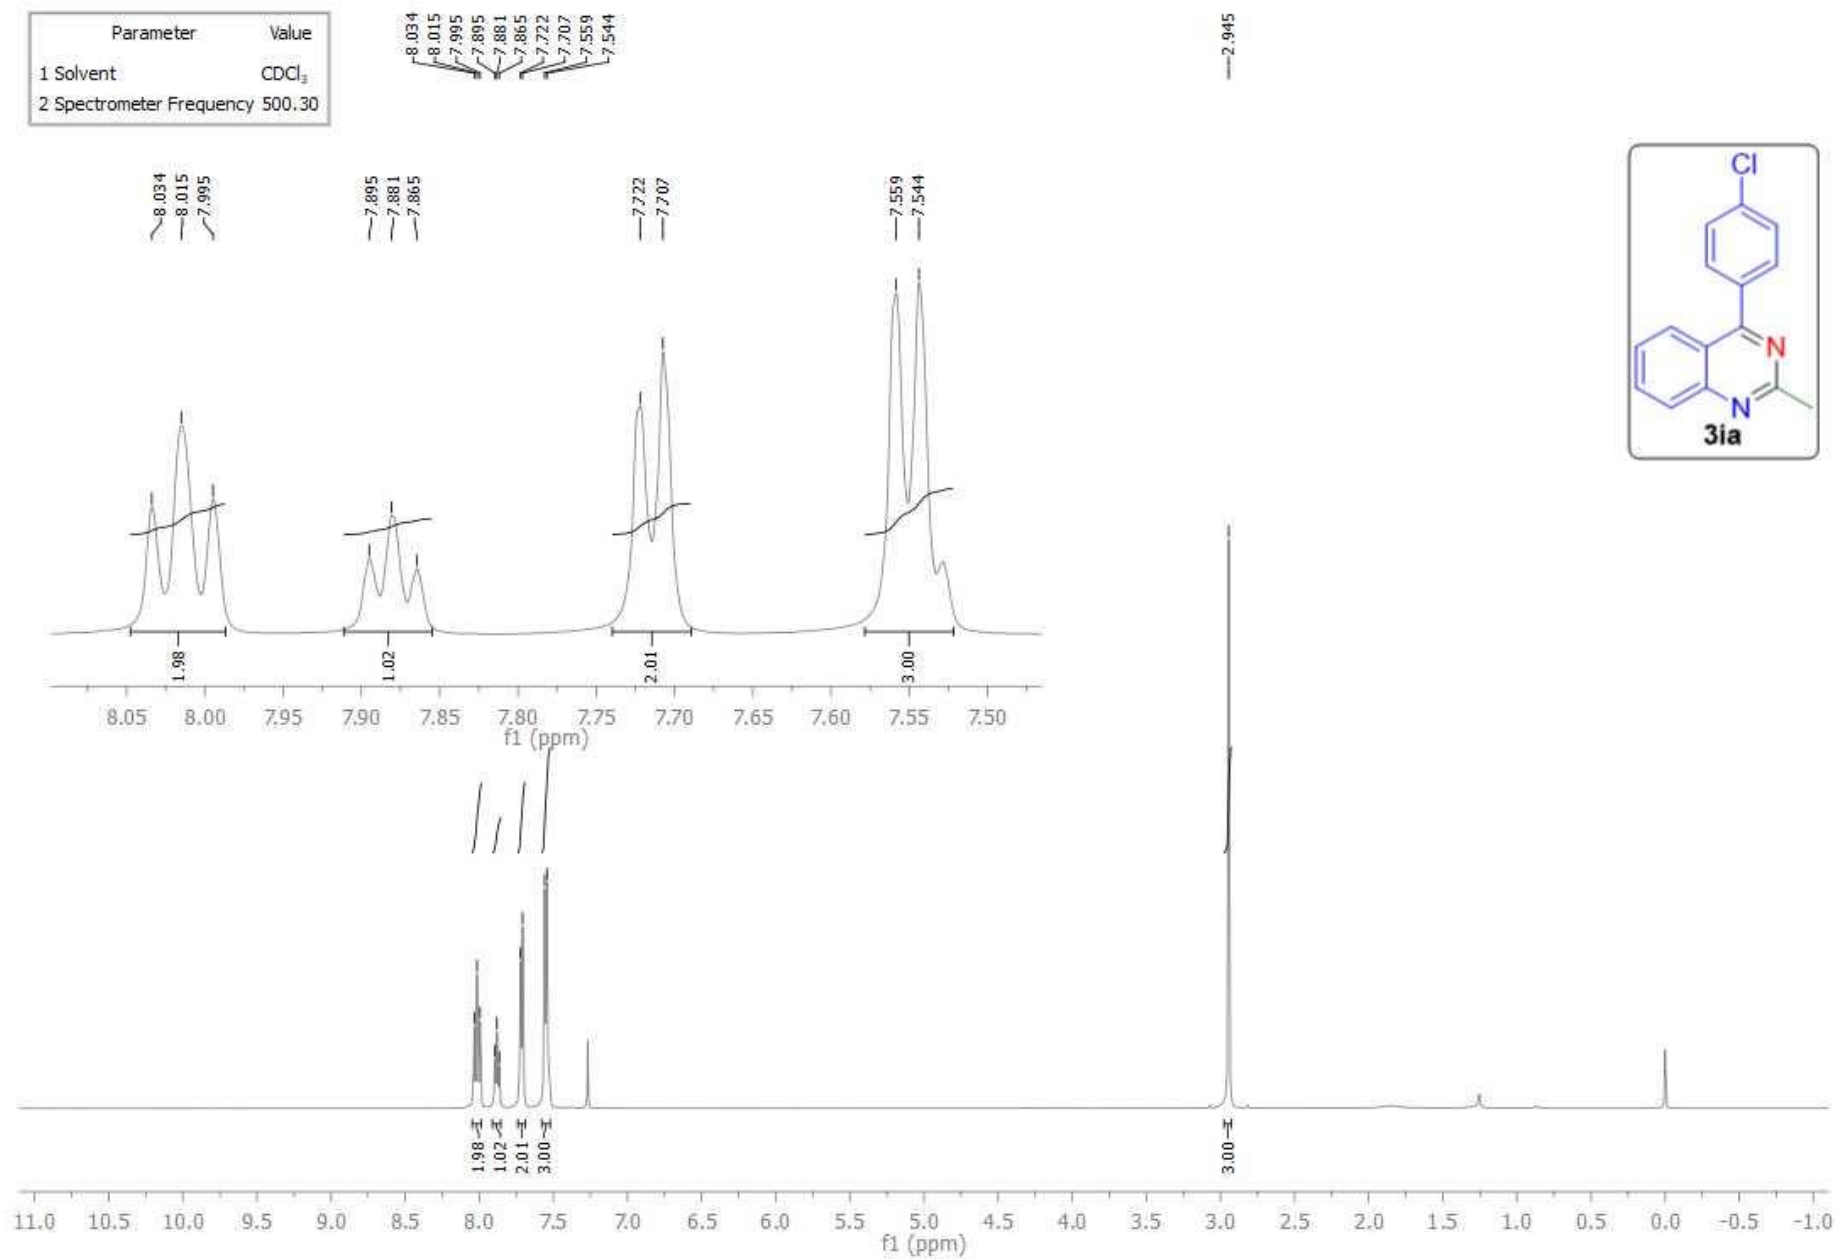

**Figure S22.** <sup>1</sup>H NMR Spectrum of 4-(4-Chlorophenyl)-2-methylquinazoline (**3ia**)

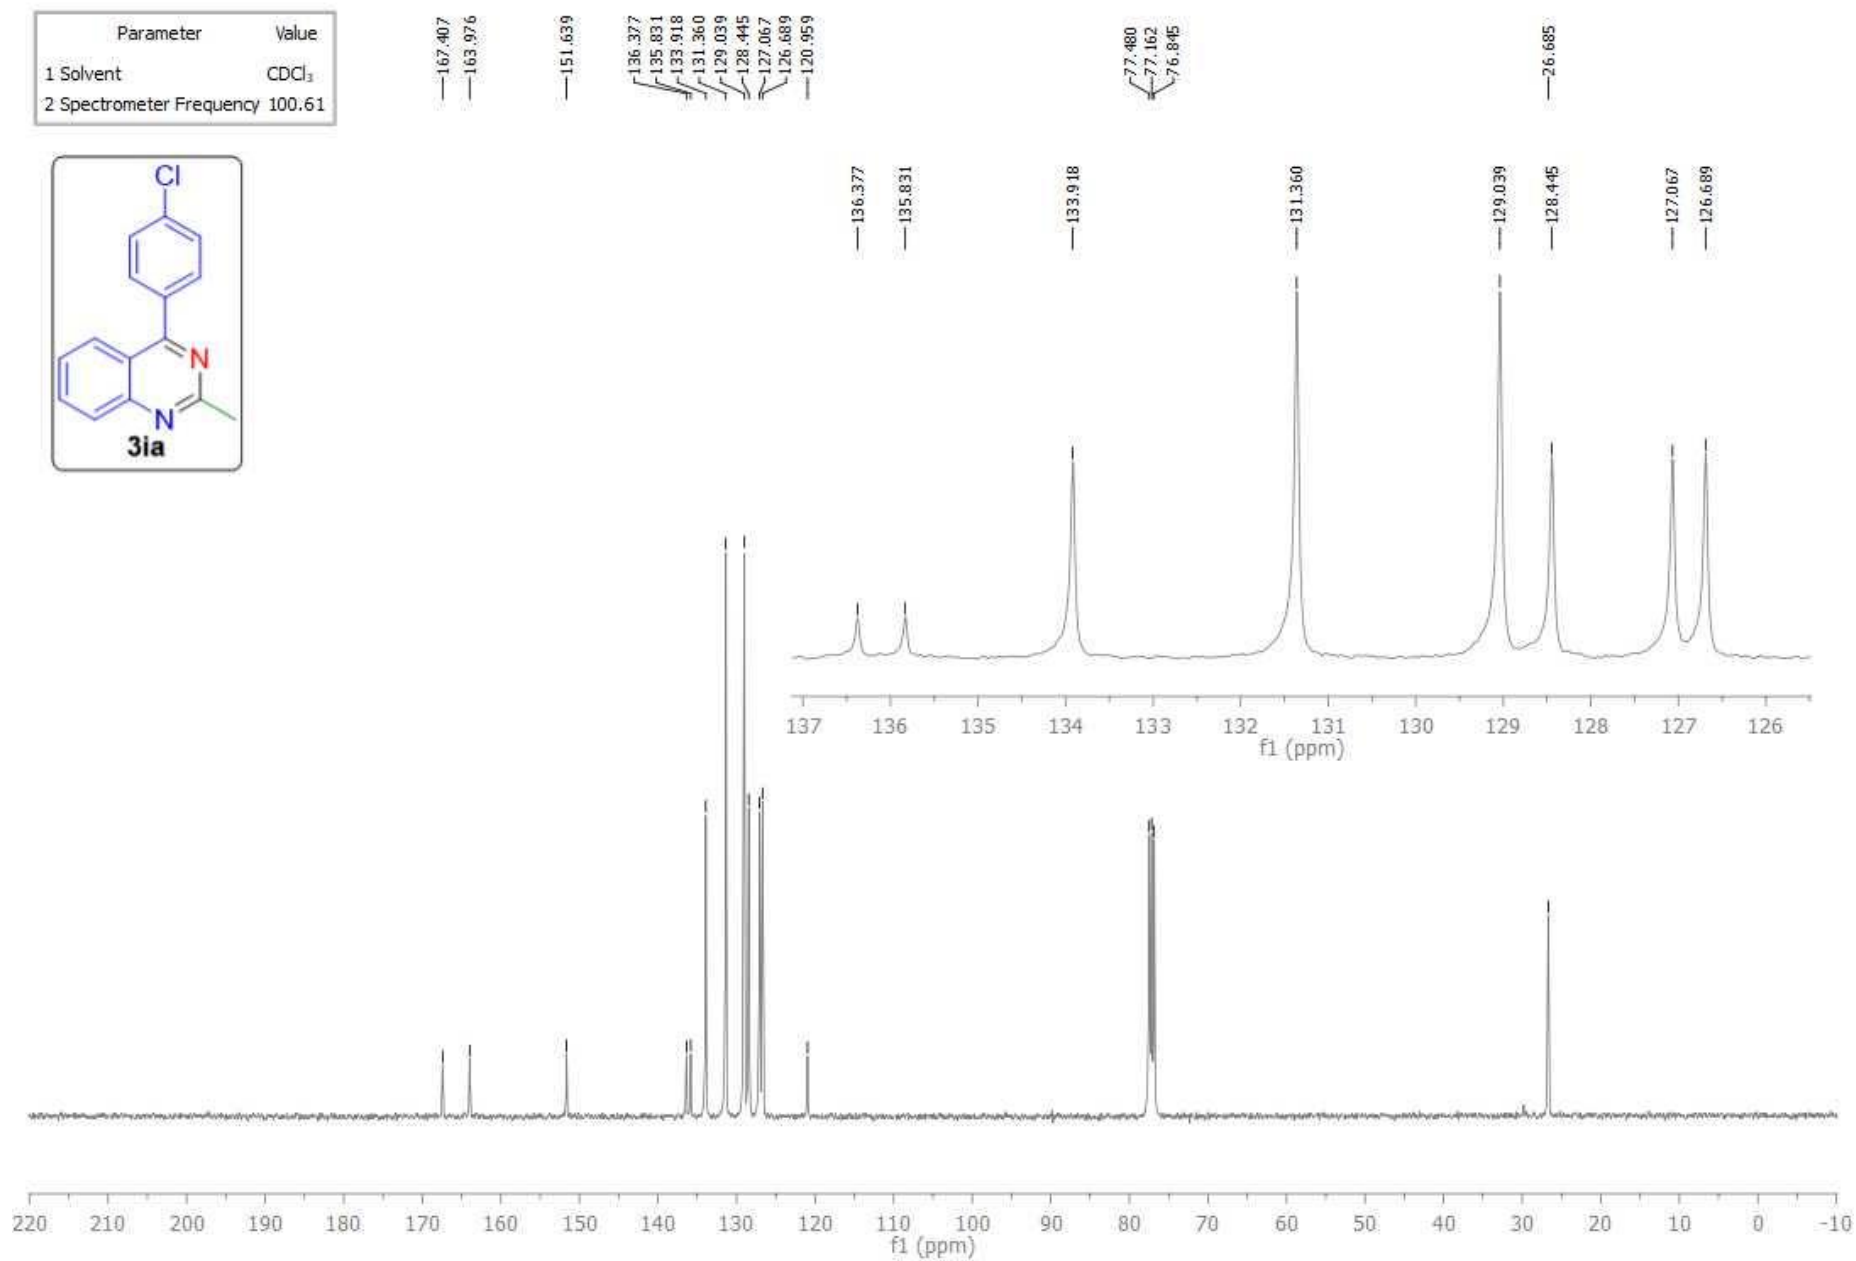

**Figure S23.** <sup>13</sup>C NMR Spectrum of 4-(4-Chlorophenyl)-2-methylquinazoline (**3ia**)

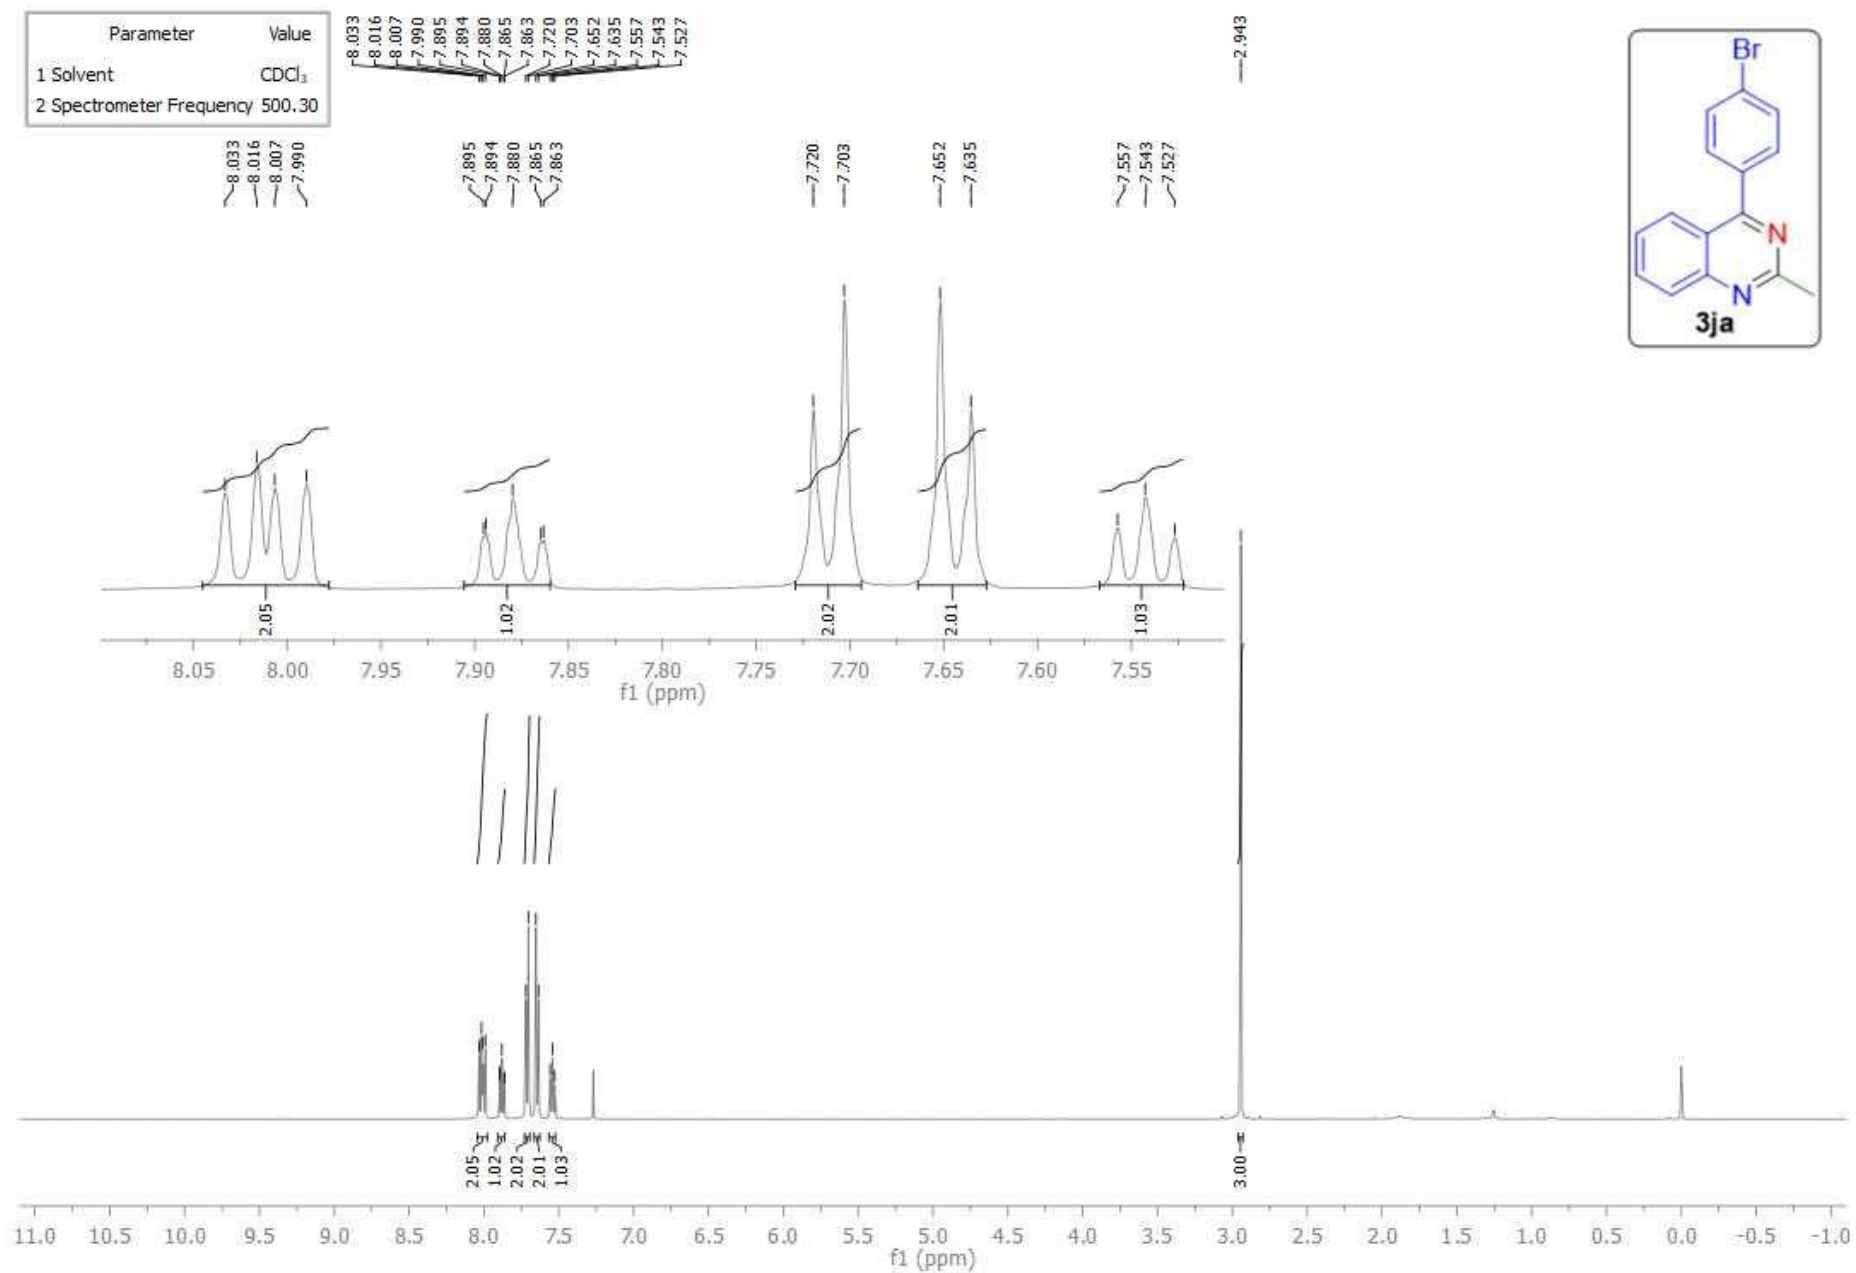

**Figure S24.** <sup>1</sup>H NMR Spectrum of 4-(4-Bromophenyl)-2-methylquinazoline (**3ja**)

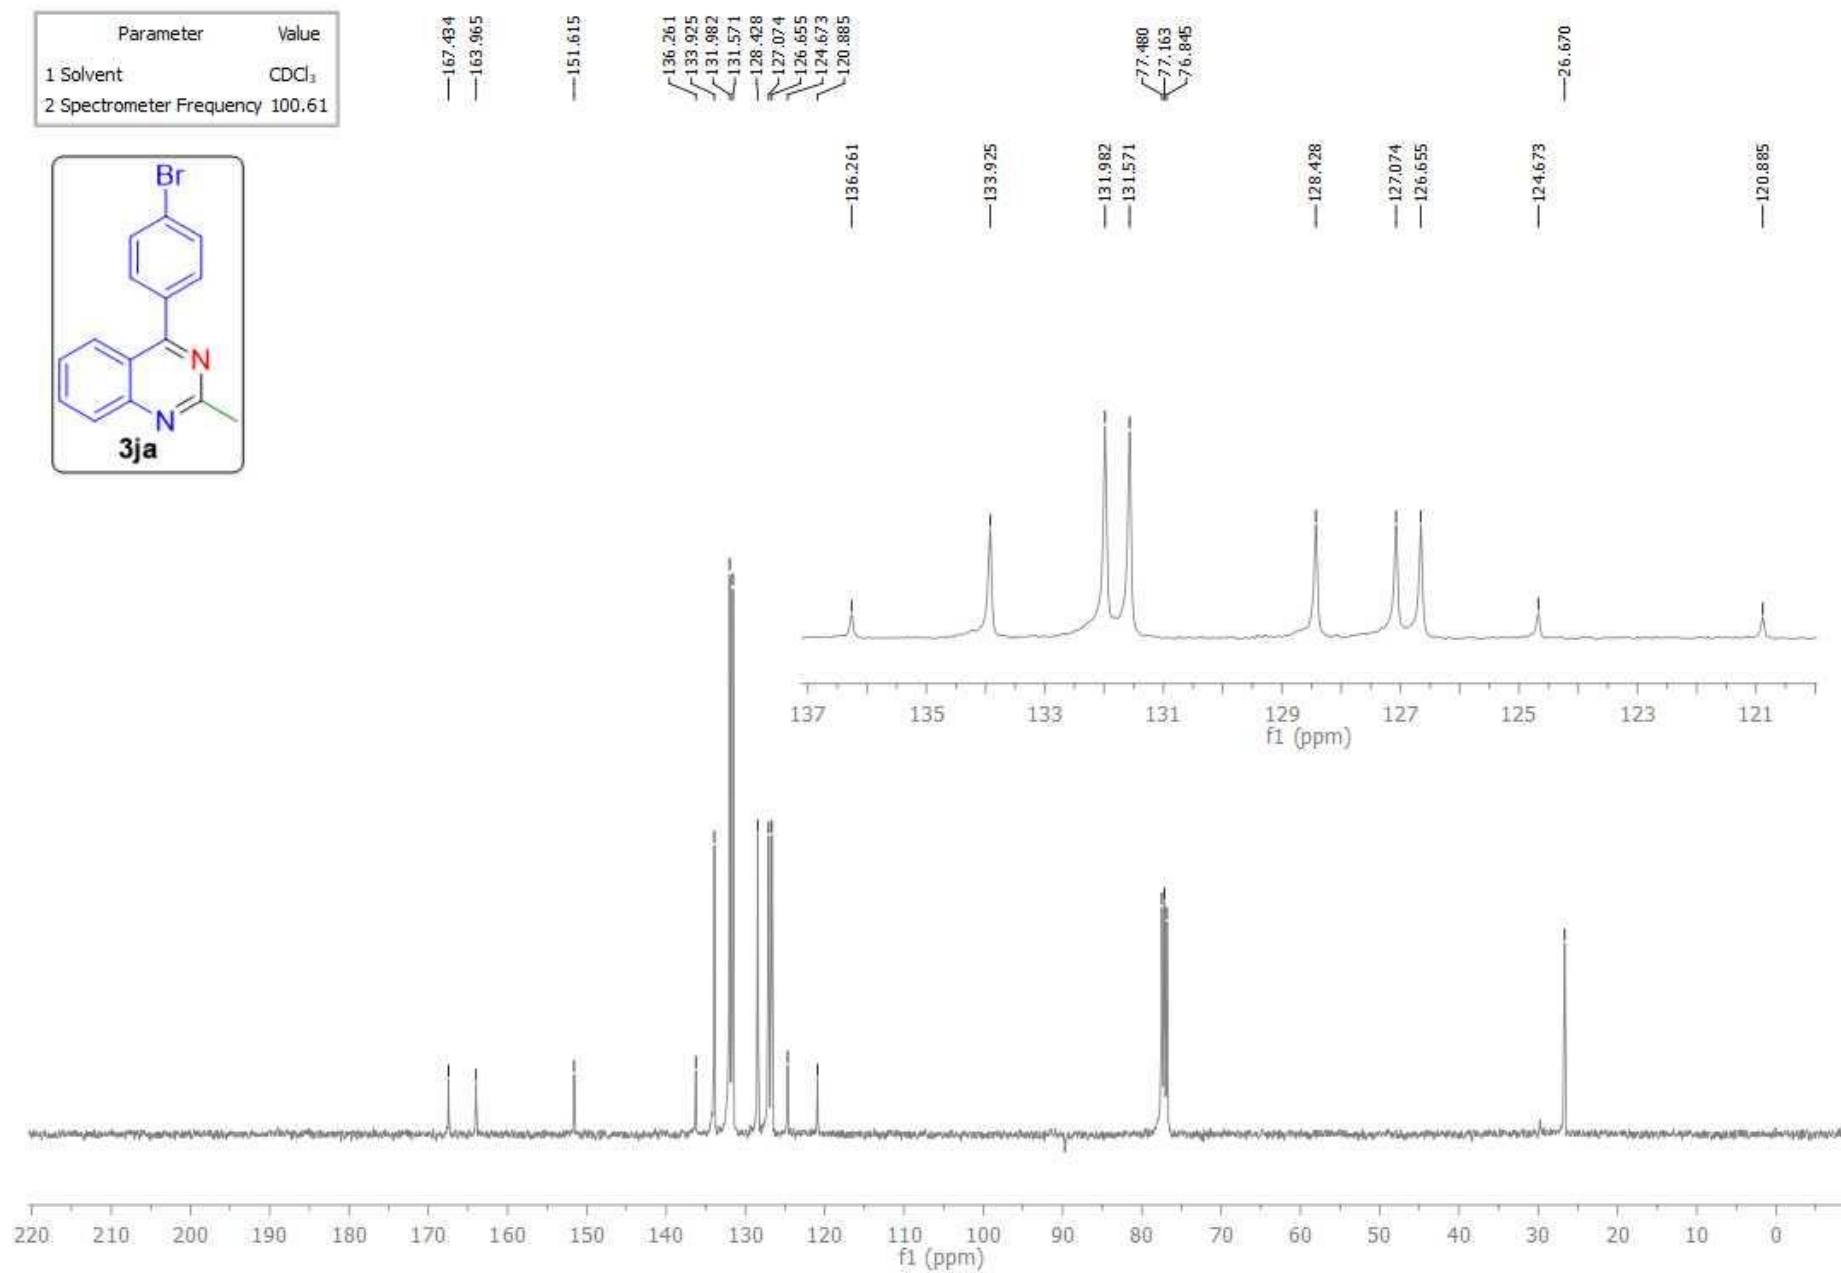

**Figure S25.** <sup>13</sup>C NMR Spectrum of 4-(4-Bromophenyl)-2-methylquinazoline (**3ja**)

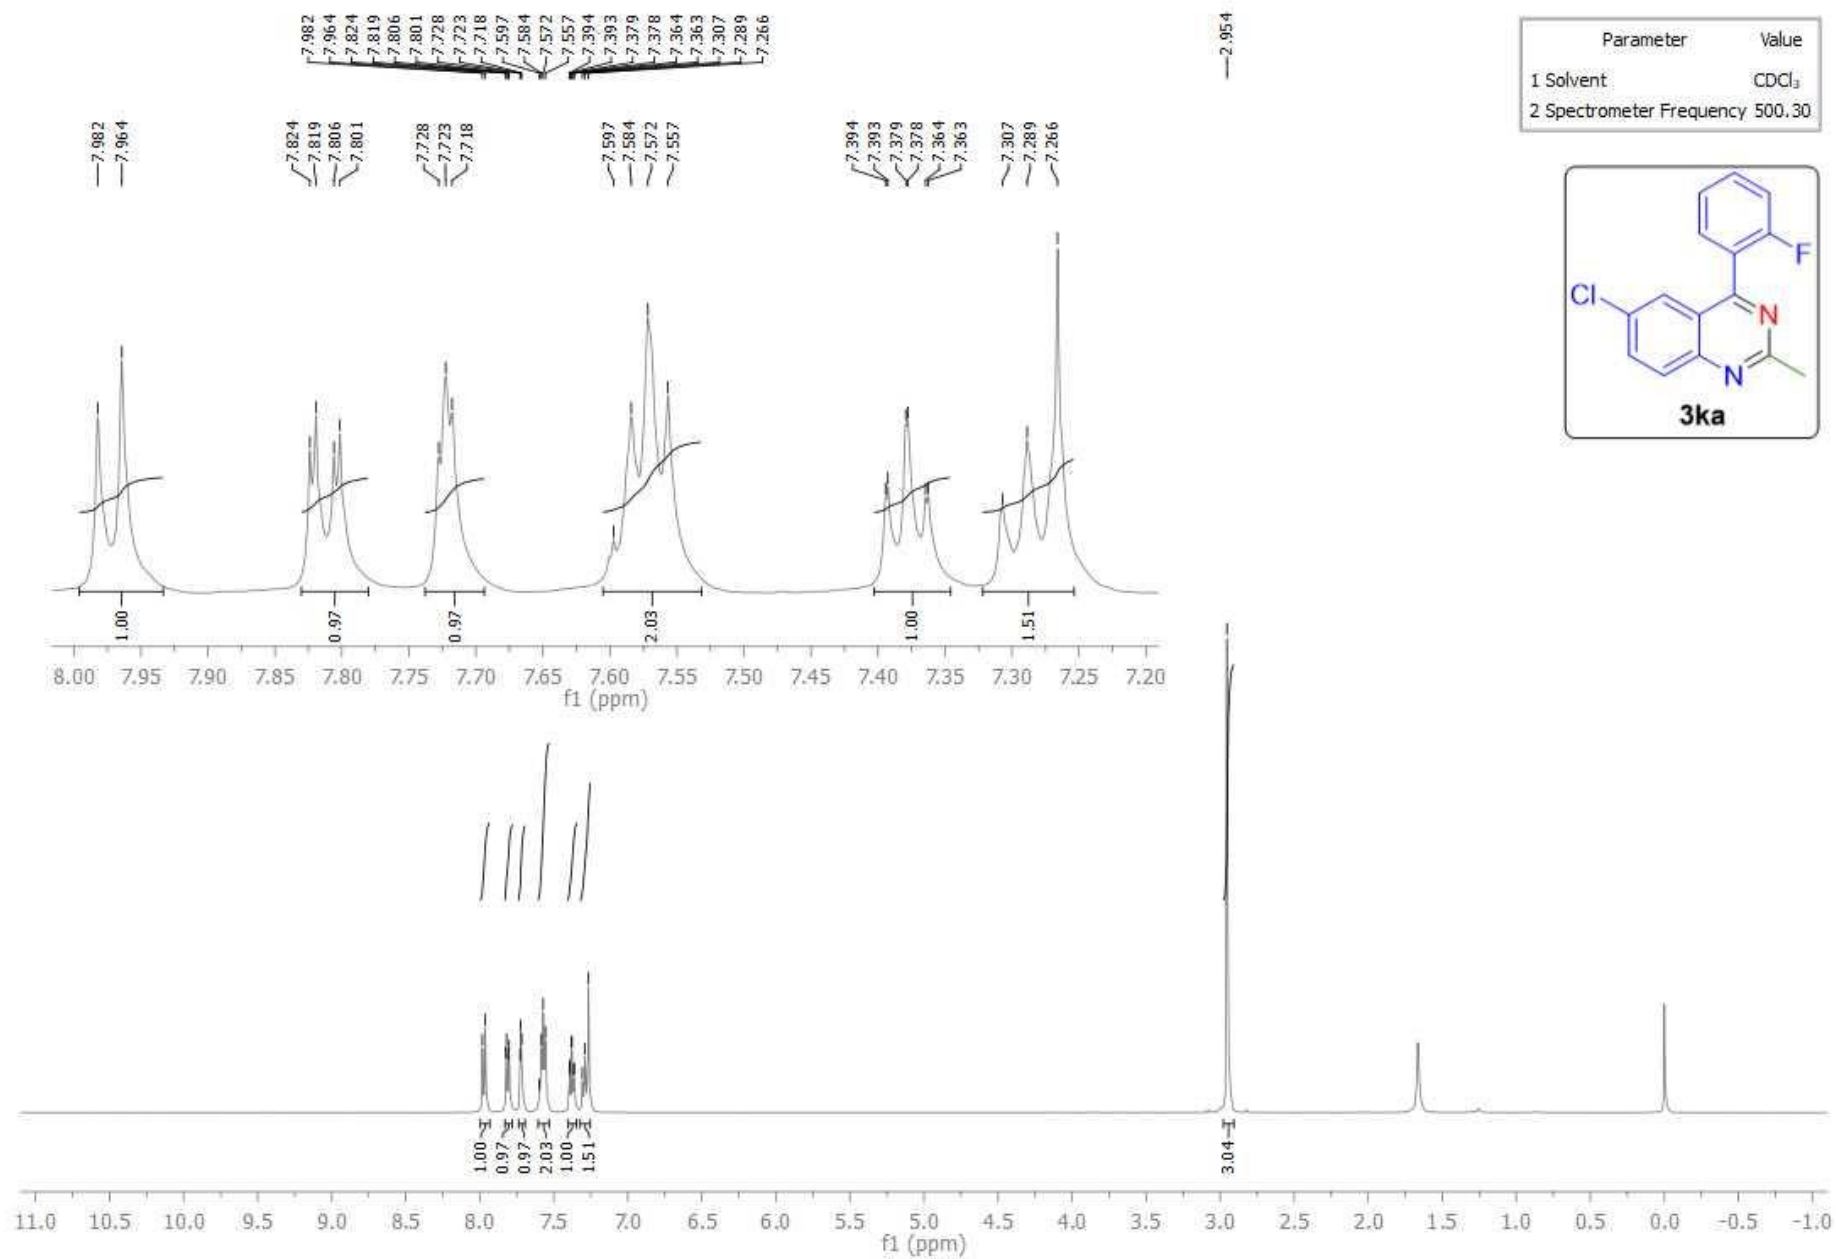

**Figure S26.** <sup>1</sup>H NMR Spectrum of 6-Chloro-4-(2-fluorophenyl)-2-methylquinazoline (**3ka**)

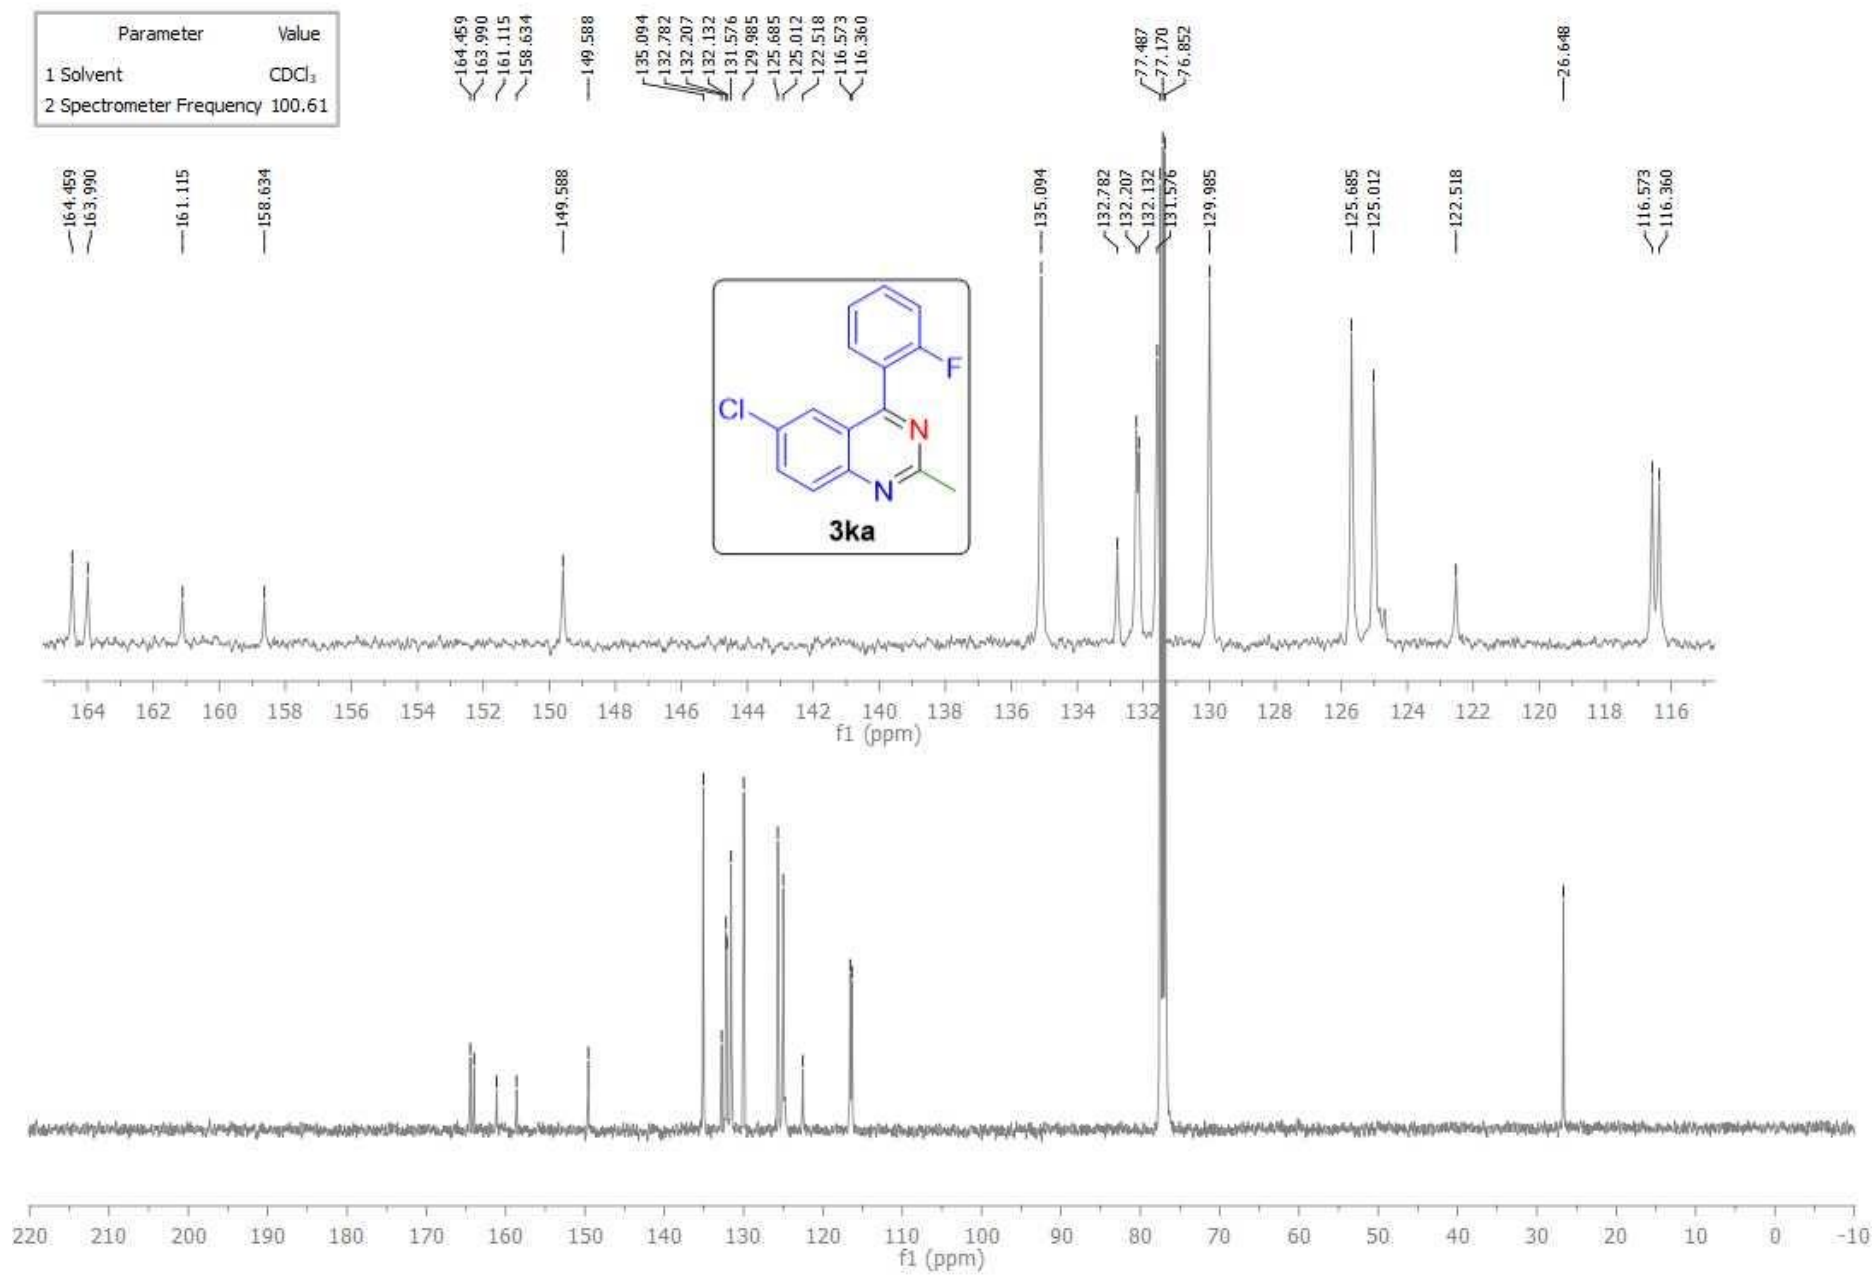

**Figure S27.** <sup>13</sup>C NMR Spectrum of 6-Chloro-4-(2-fluorophenyl)-2-methylquinazoline (**3ka**)



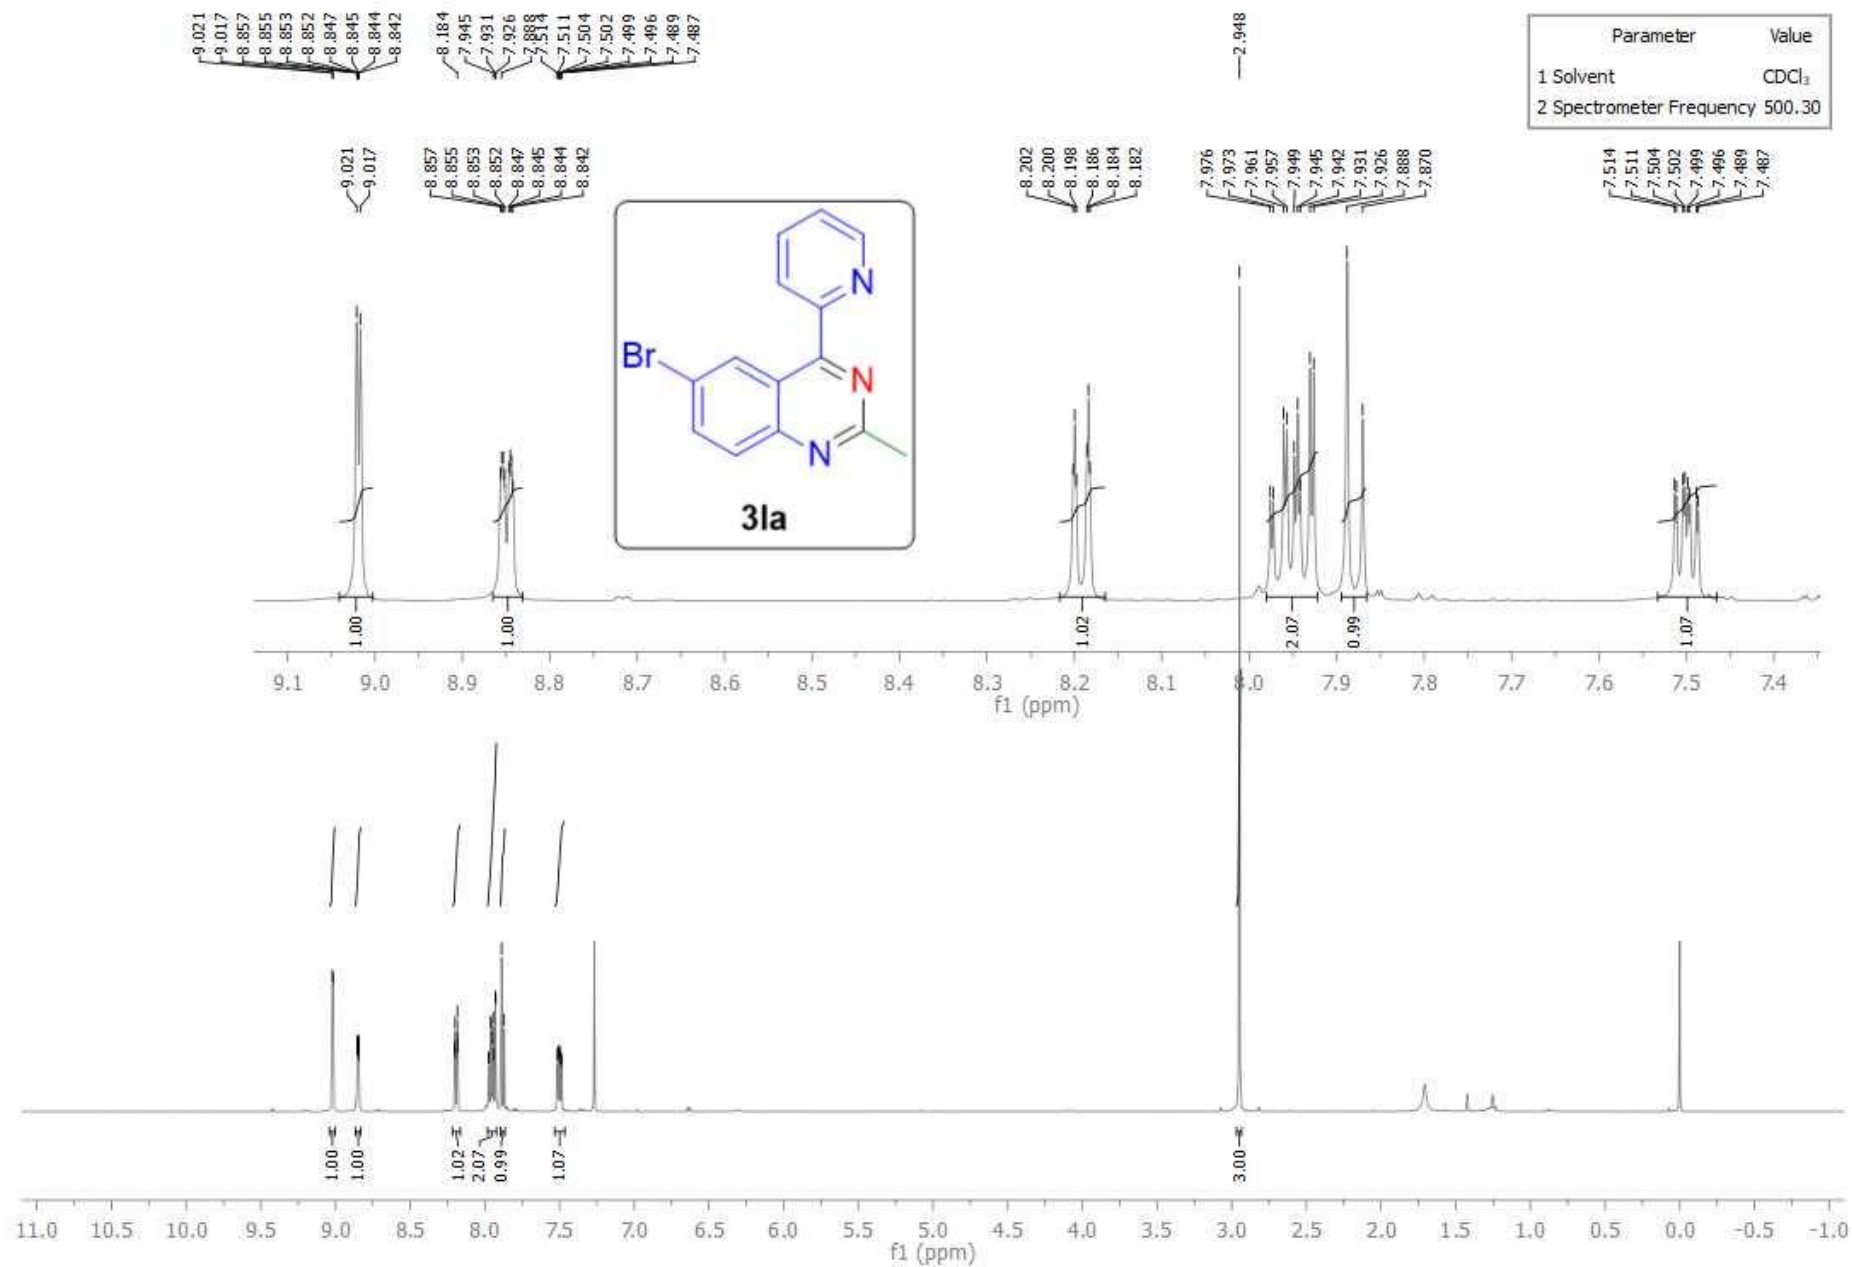

**Figure S28.** <sup>1</sup>H NMR Spectrum of 6-Bromo-2-methyl-4-(pyridin-2-yl)quinazoline (**3a**)

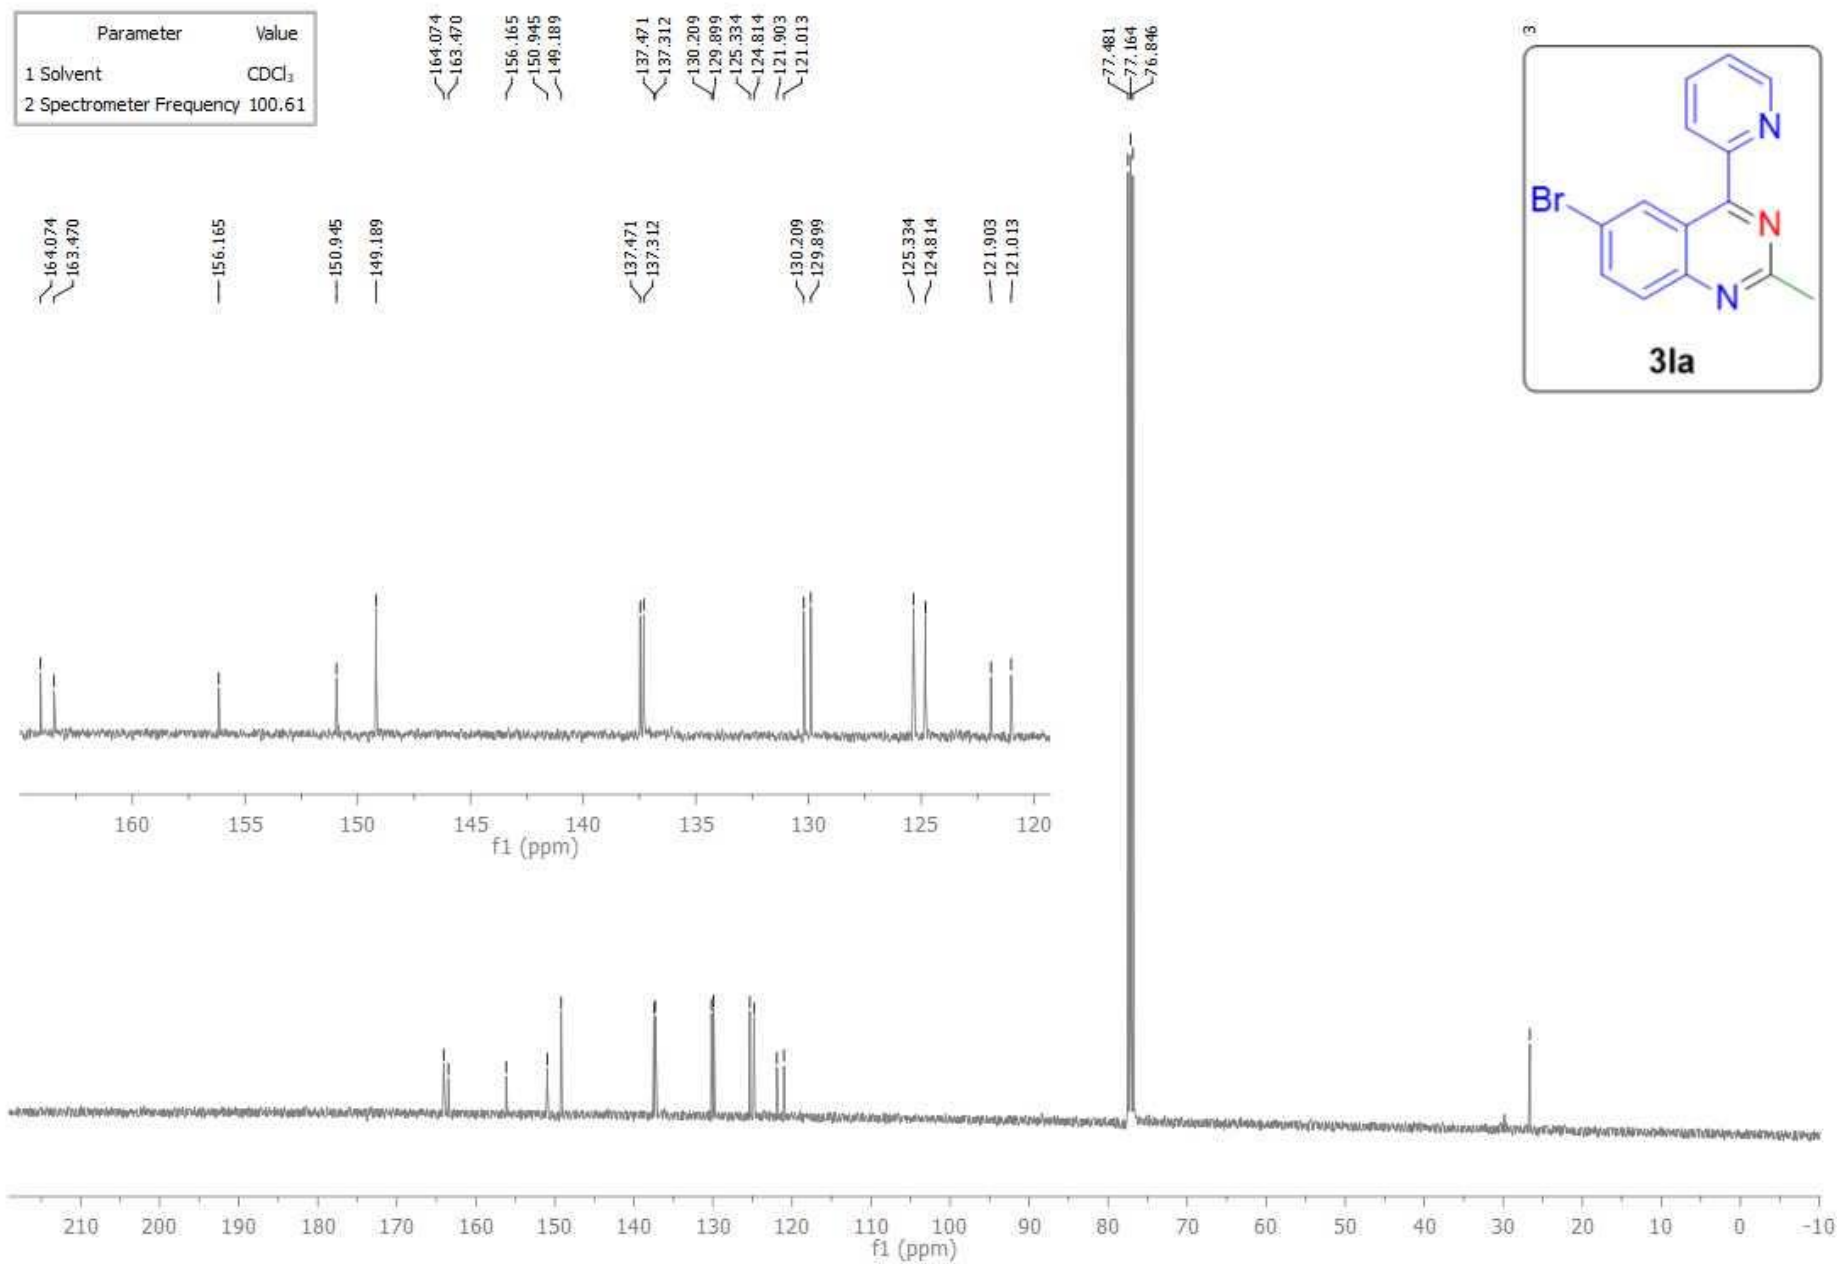

**Figure S29.** <sup>13</sup>C NMR Spectrum of 6-Bromo-2-methyl-4-(pyridin-2-yl)quinazoline (**3la**)

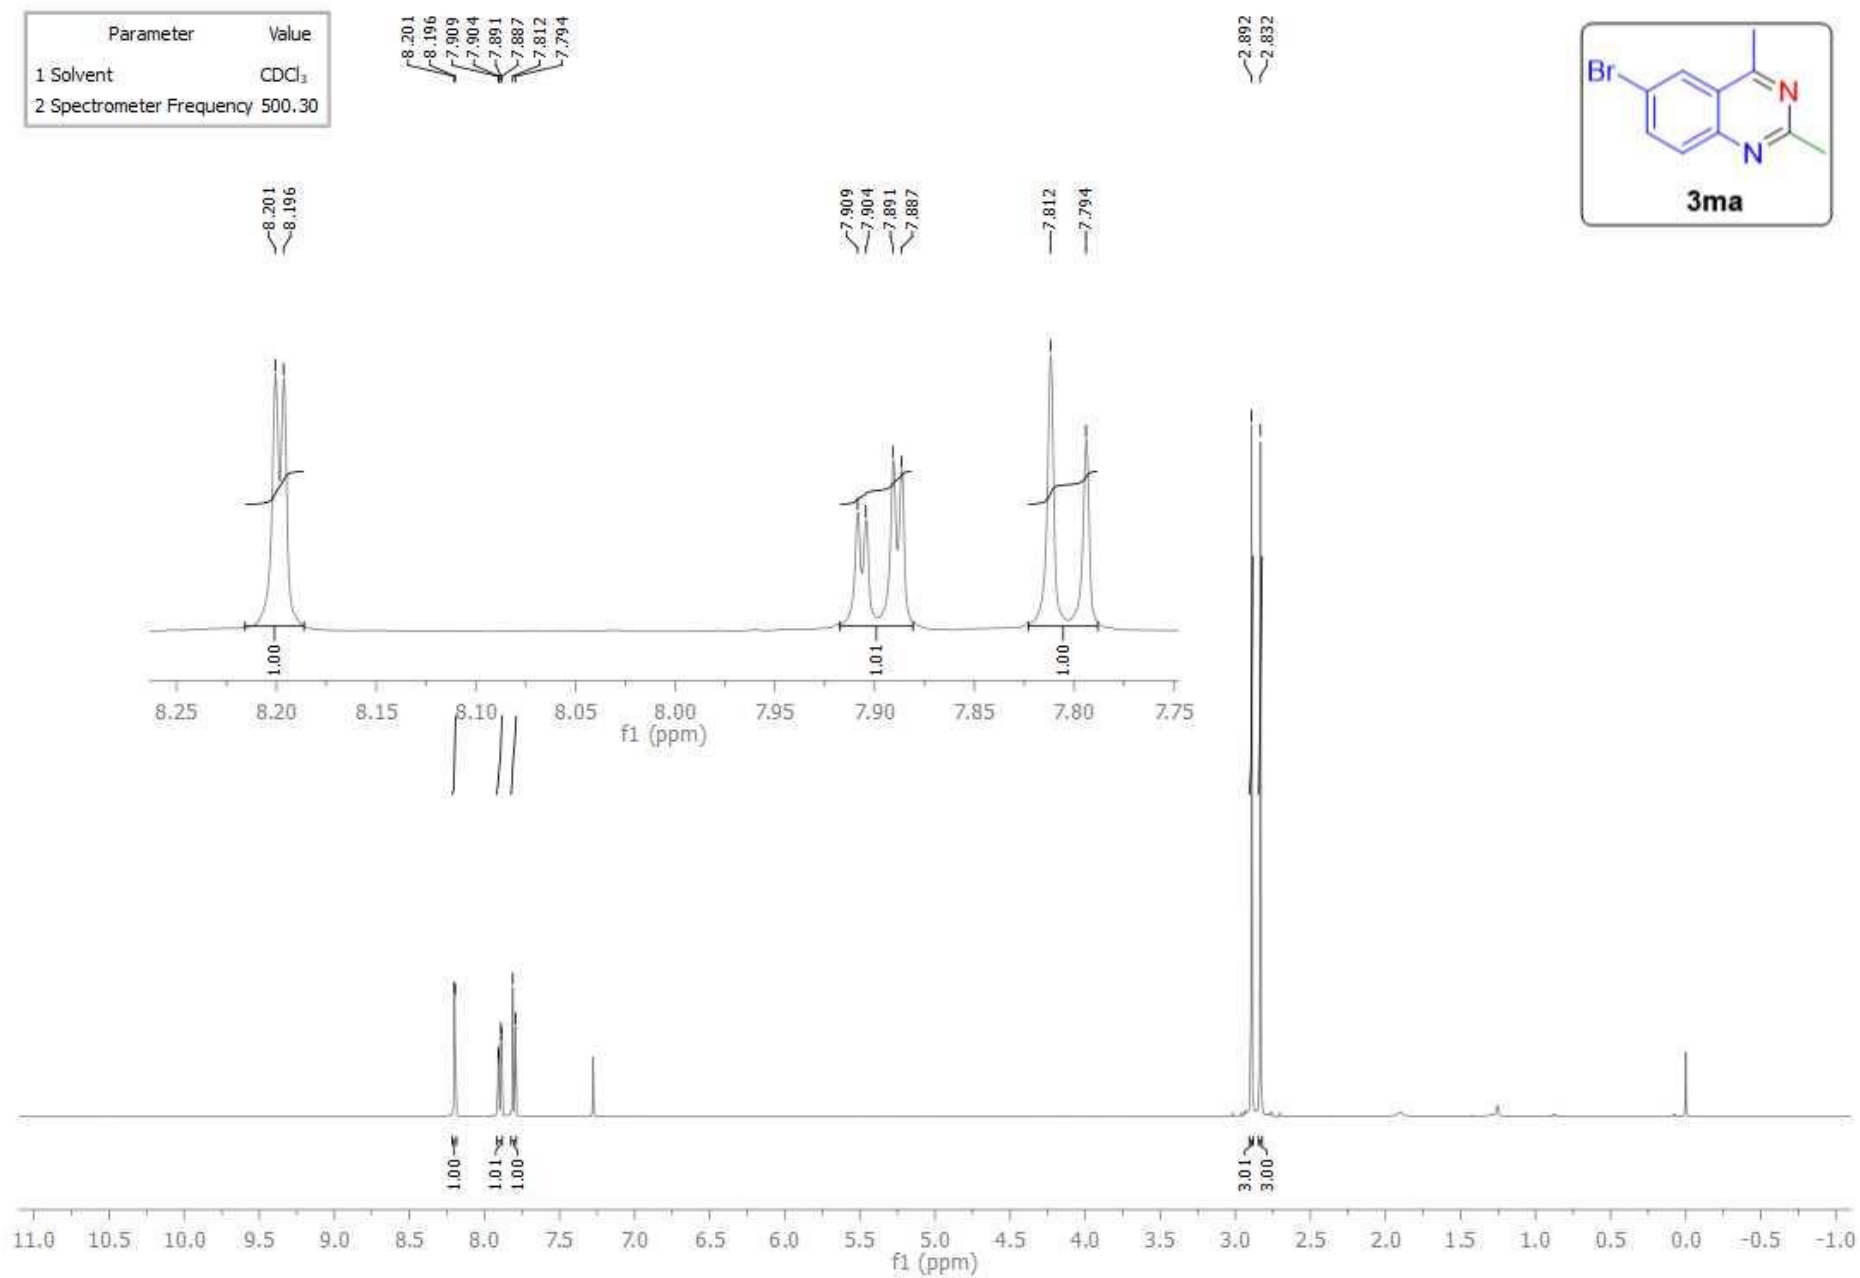

**Figure S30.** <sup>1</sup>H NMR Spectrum of 6-Bromo-2,4-dimethylquinazoline (**3ma**)

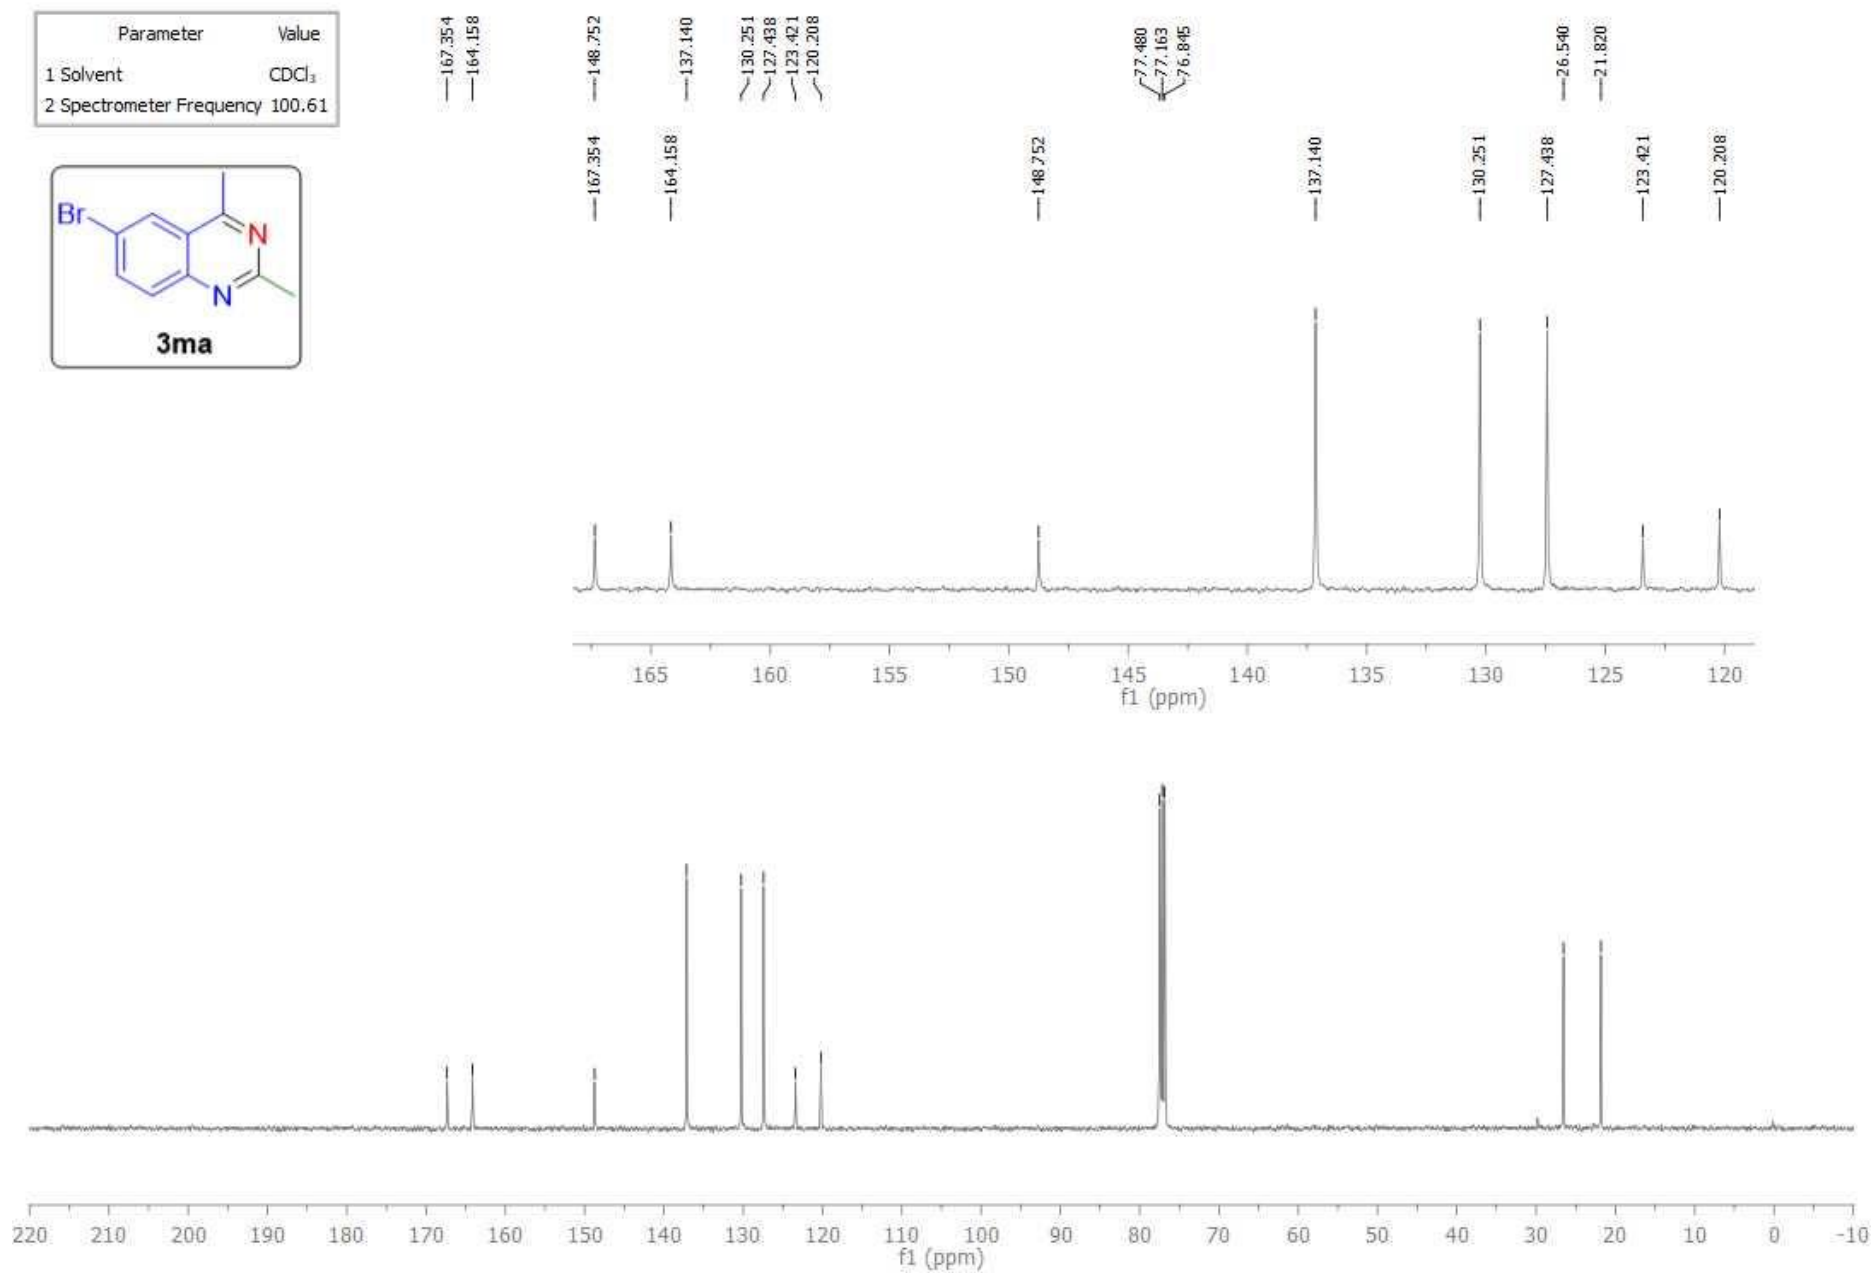

**Figure S31.** <sup>13</sup>C NMR Spectrum of 6-Bromo-2,4-dimethylquinazoline (**3ma**)

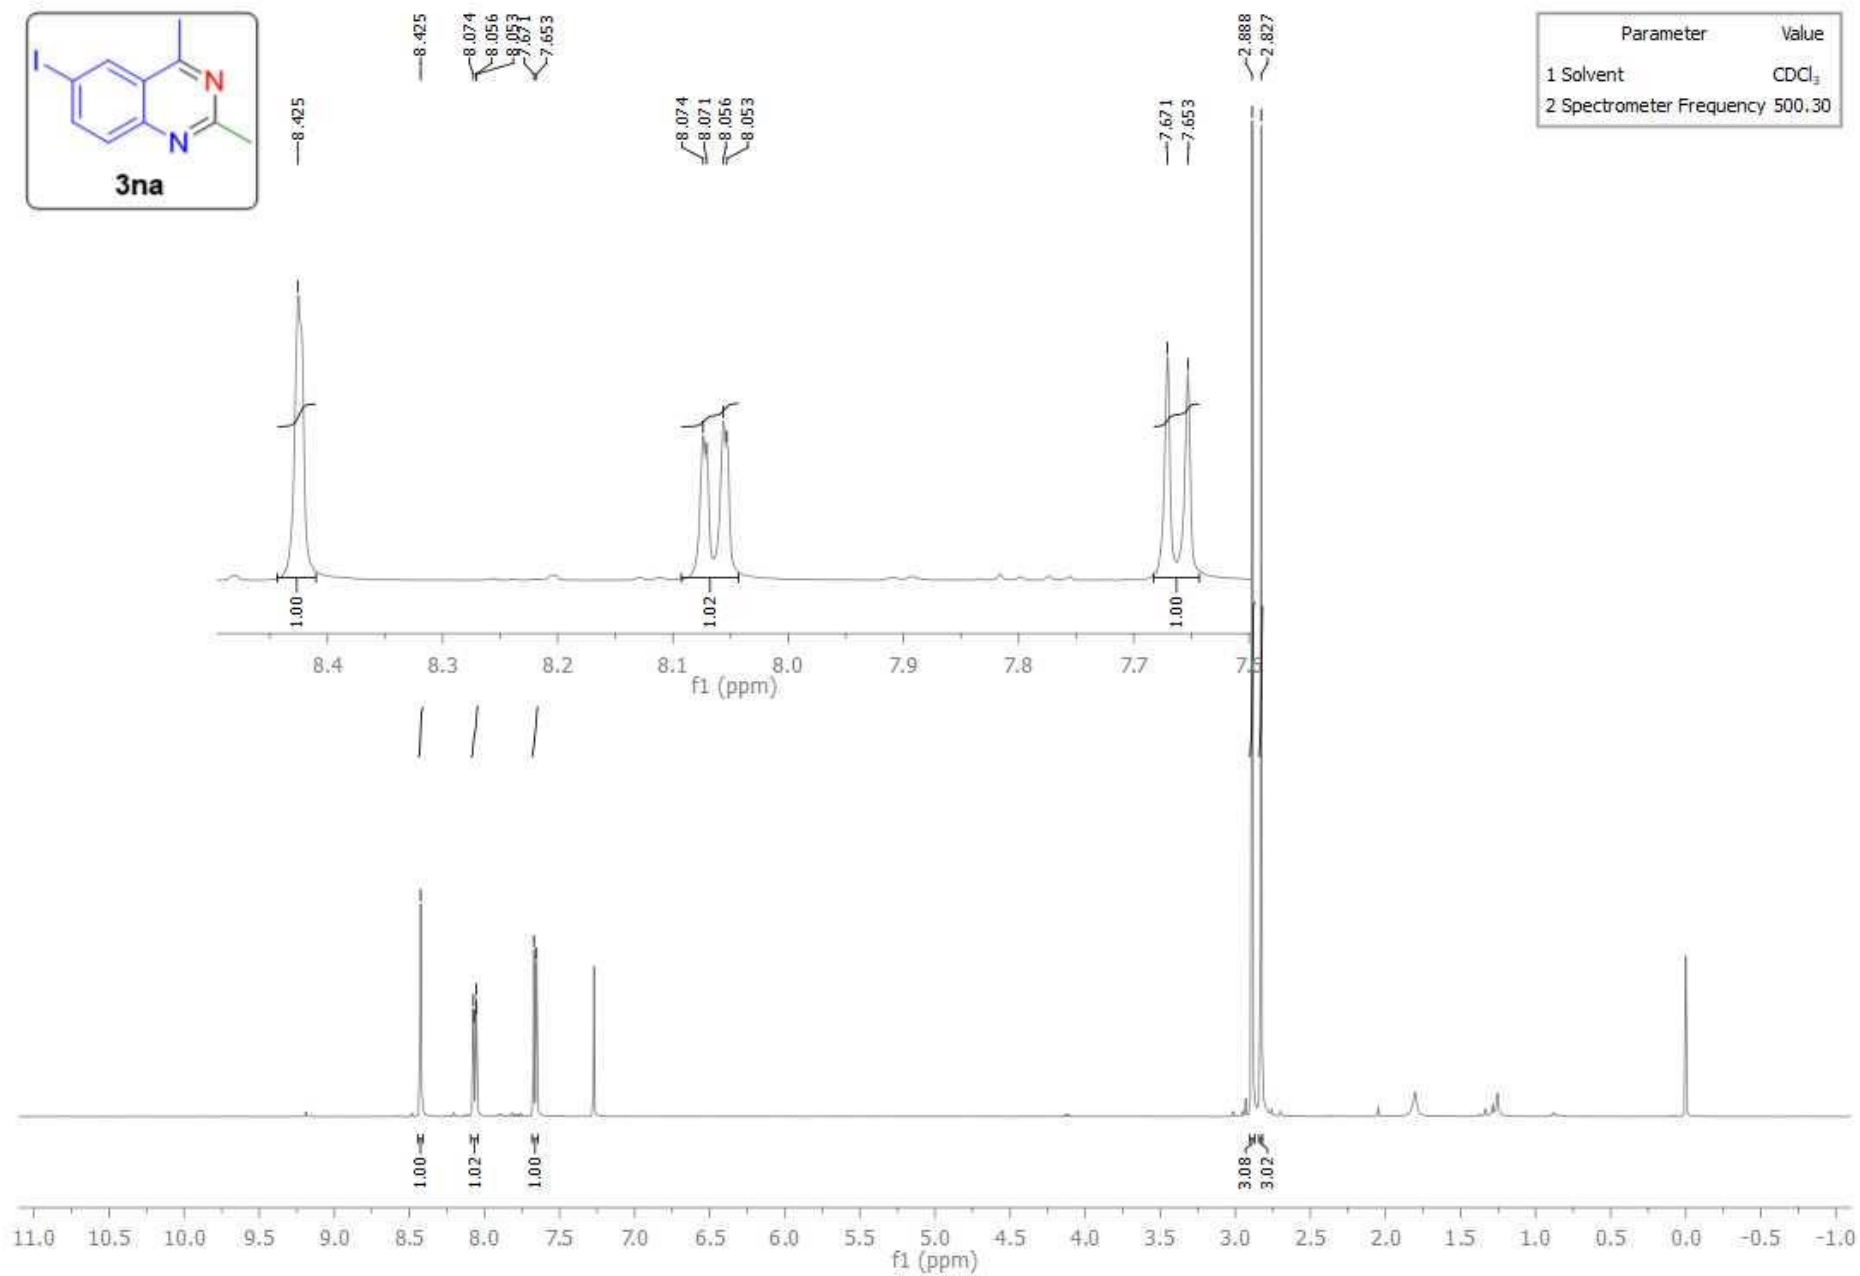

**Figure S32.** <sup>1</sup>H NMR Spectrum of 6-Iodo-2,4-dimethylquinazoline (**3na**)

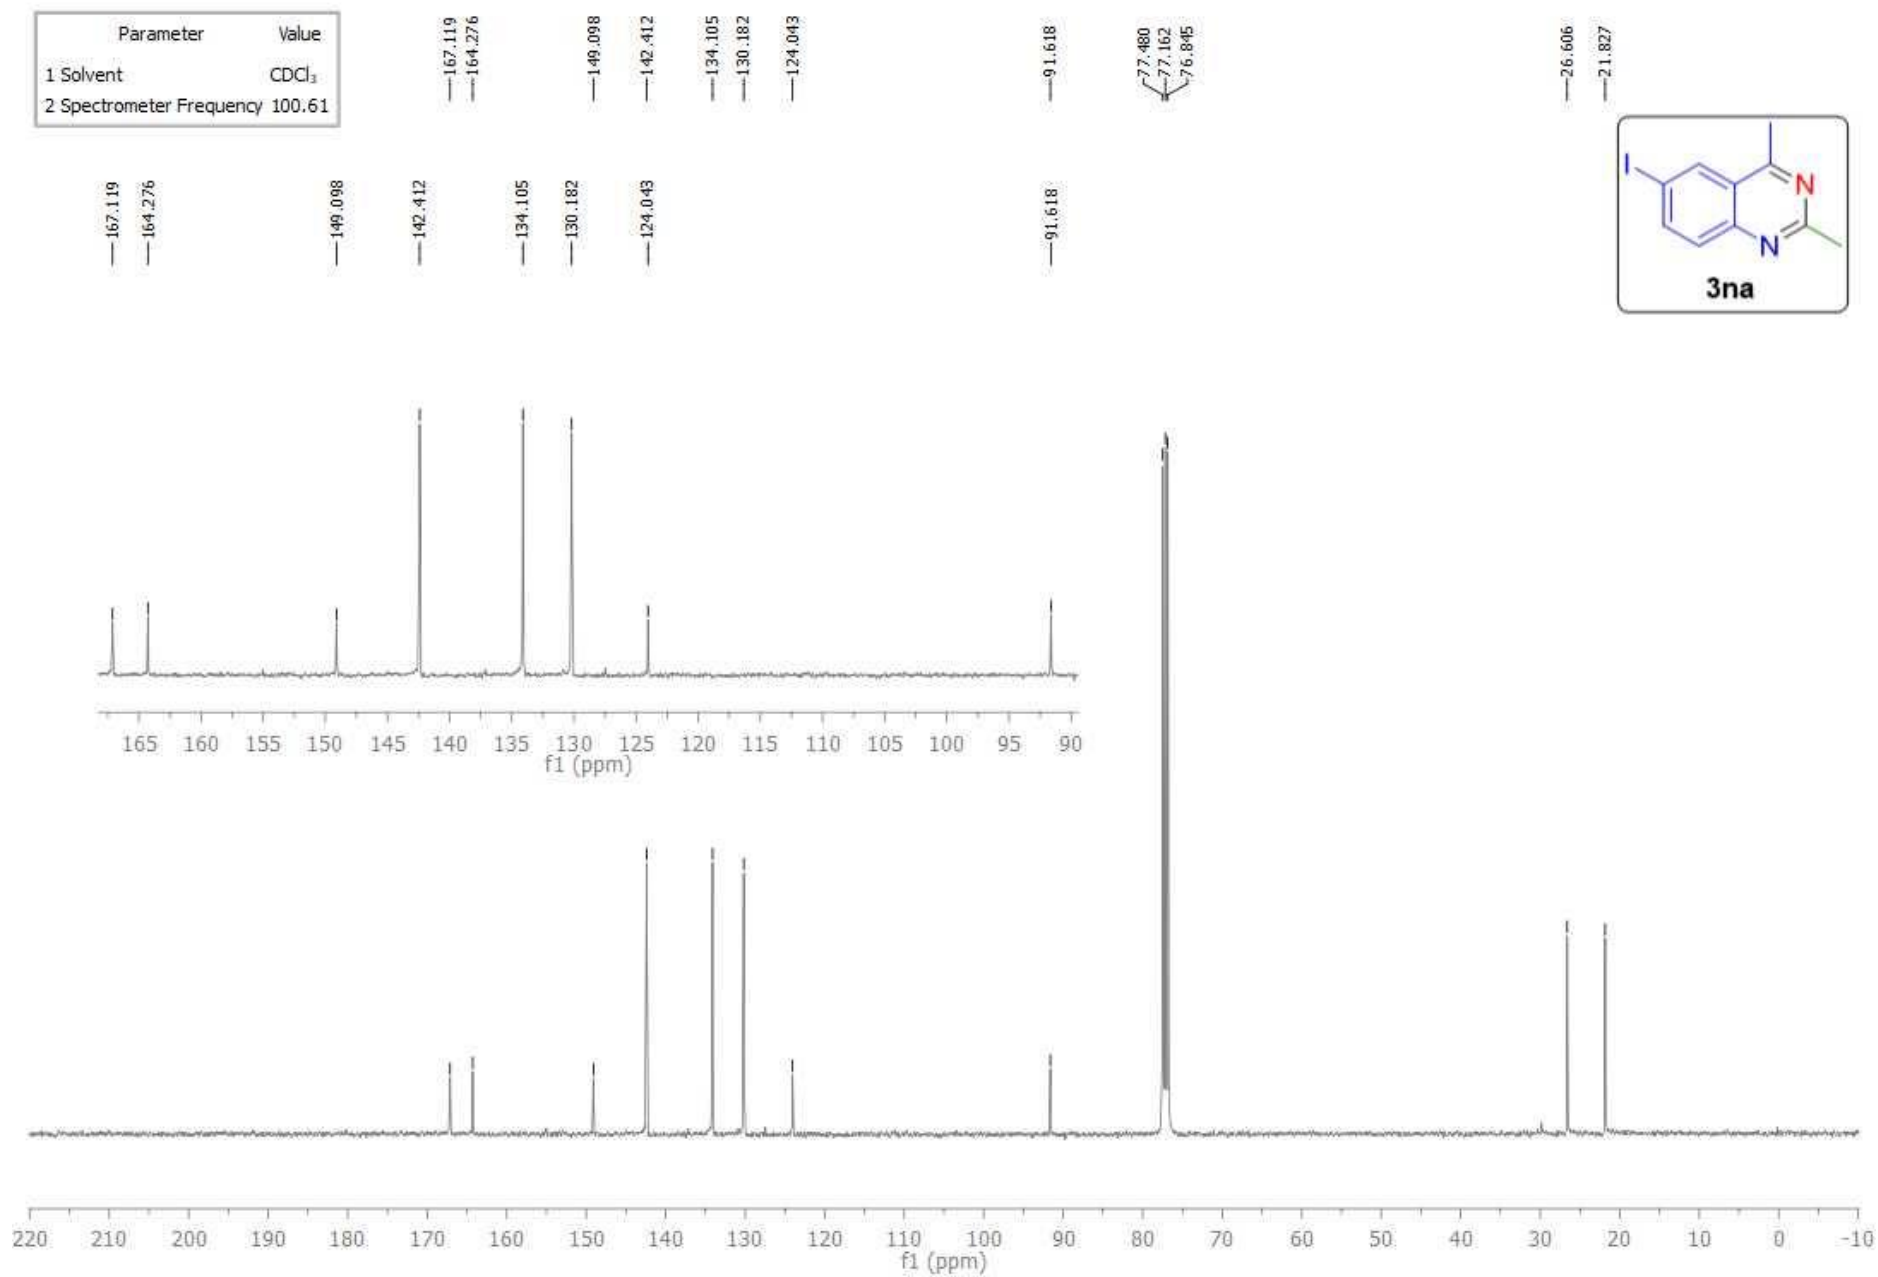

**Figure S33.** <sup>13</sup>C NMR Spectrum of 6-Iodo-2,4-dimethylquinazoline (**3na**)

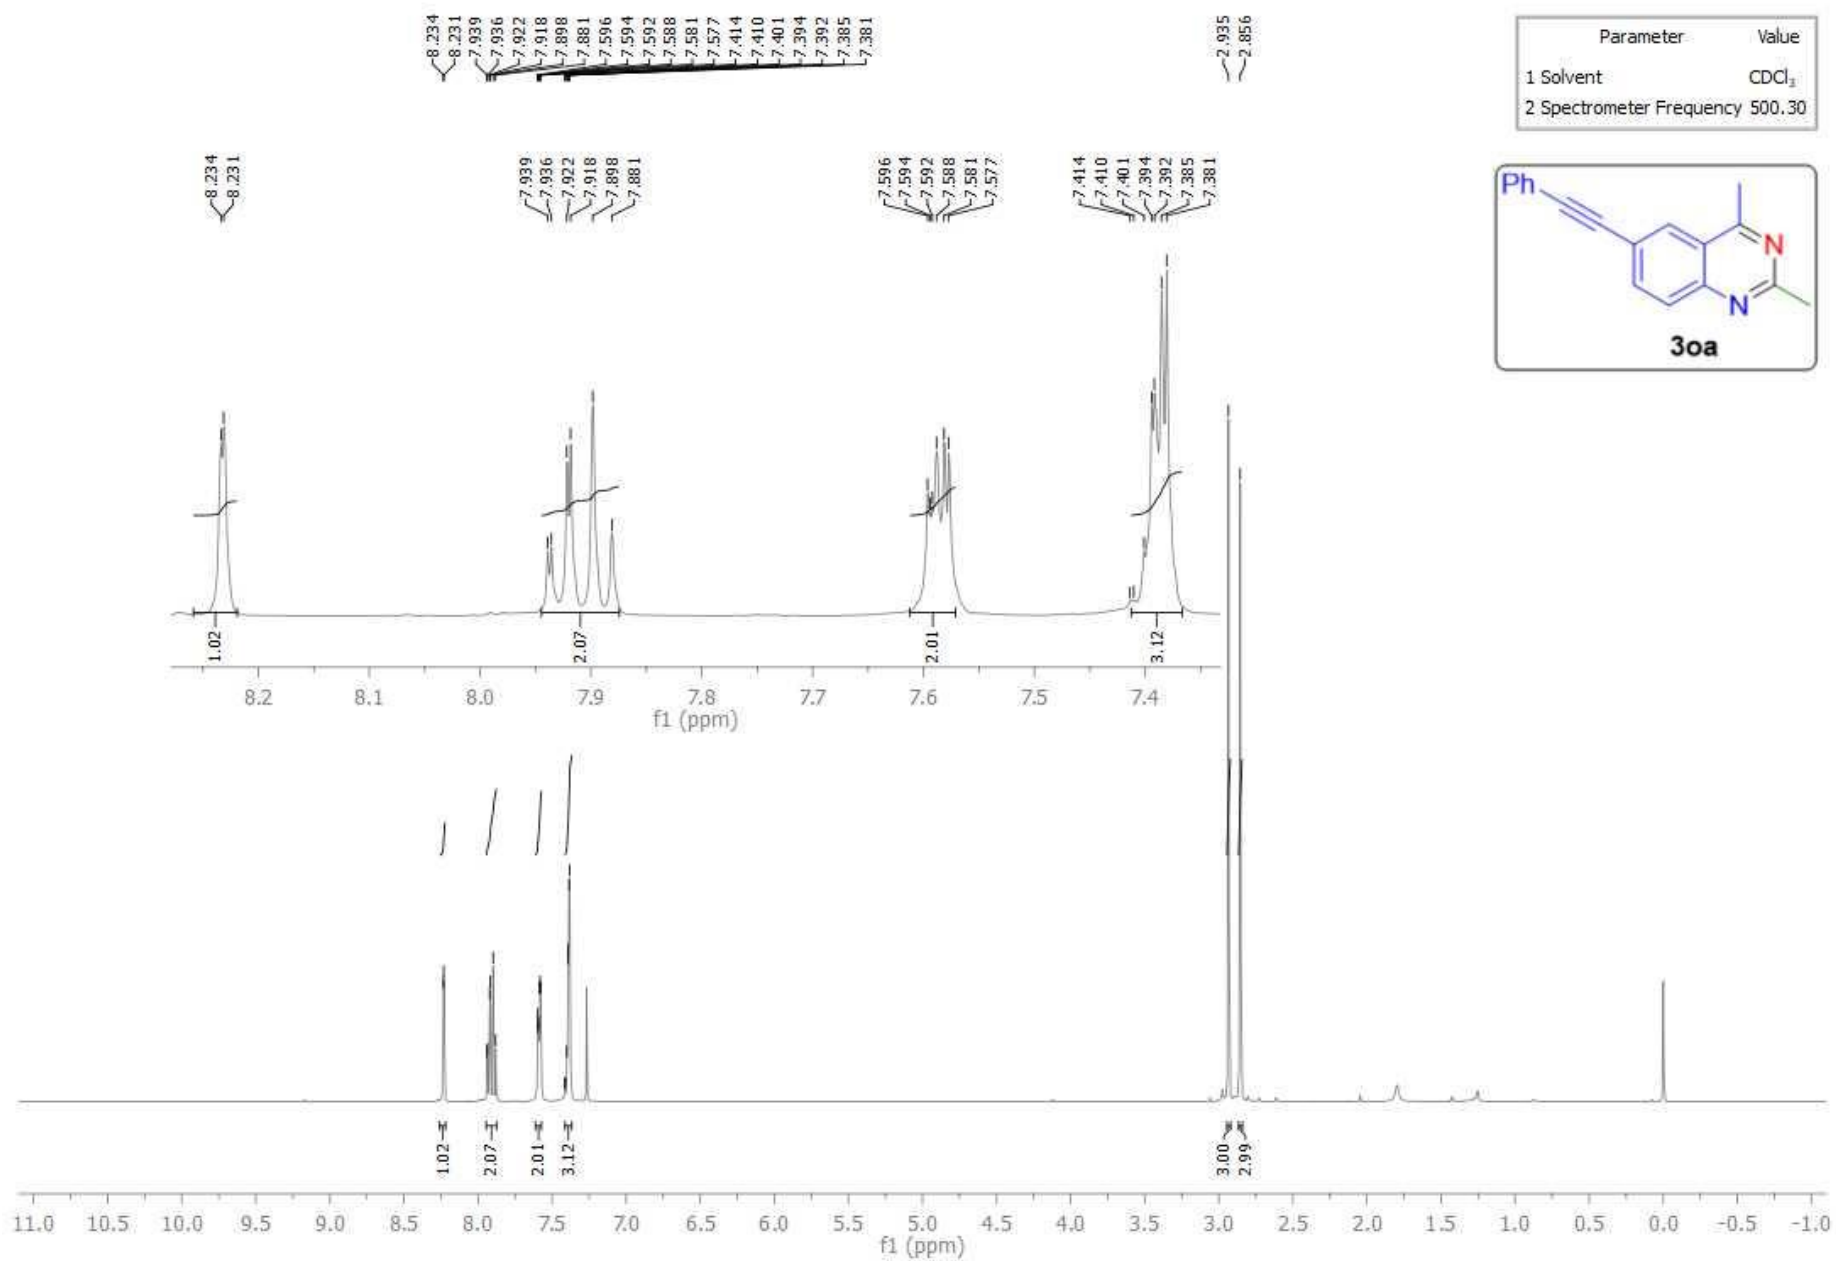

**Figure S34.** <sup>1</sup>H NMR Spectrum of 2,4-Dimethyl-6-(phenylethynyl)quinazoline (**30a**)

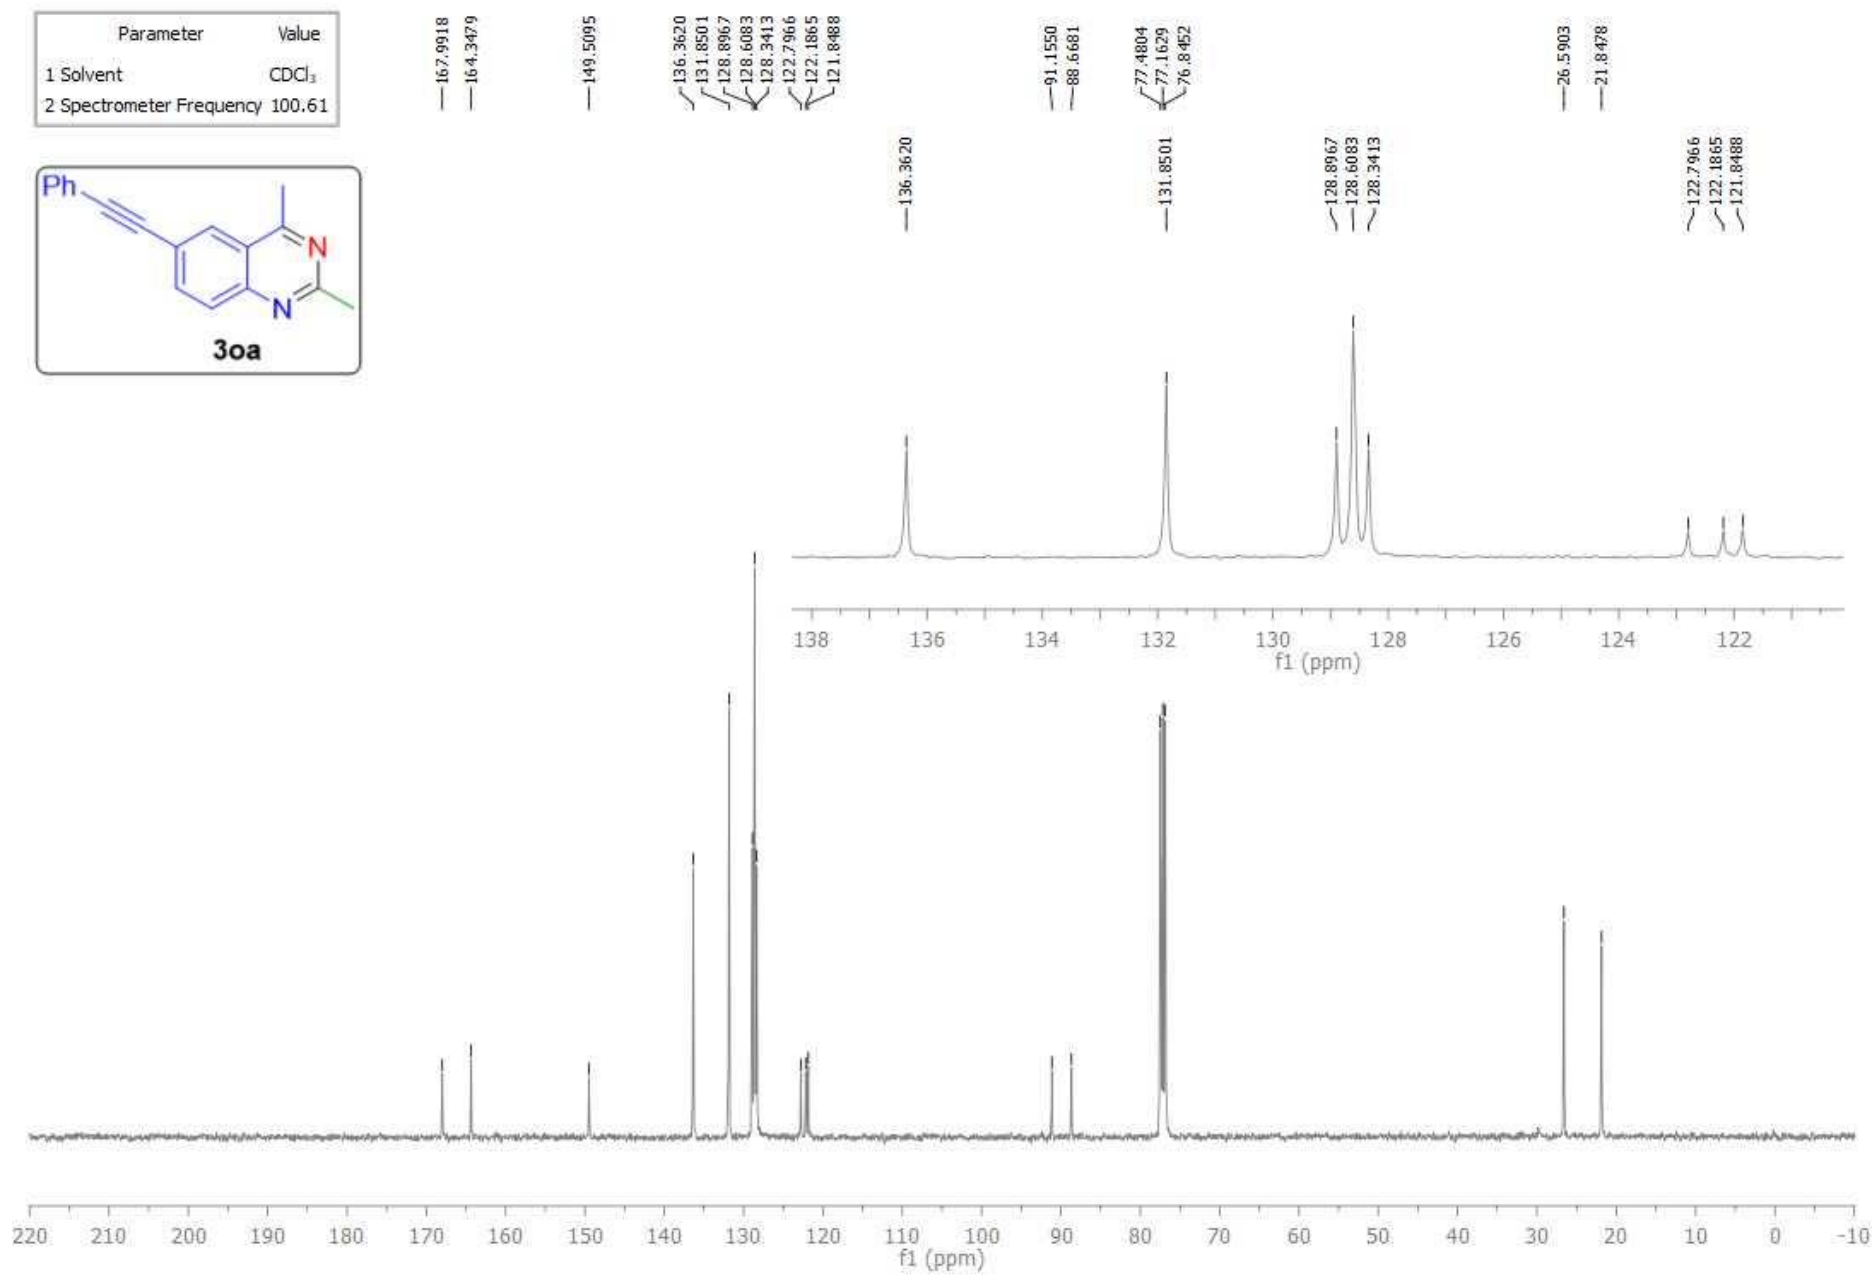

**Figure S35.** <sup>13</sup>C NMR Spectrum of 2,4-Dimethyl-6-(phenylethynyl)quinazoline (**30a**)



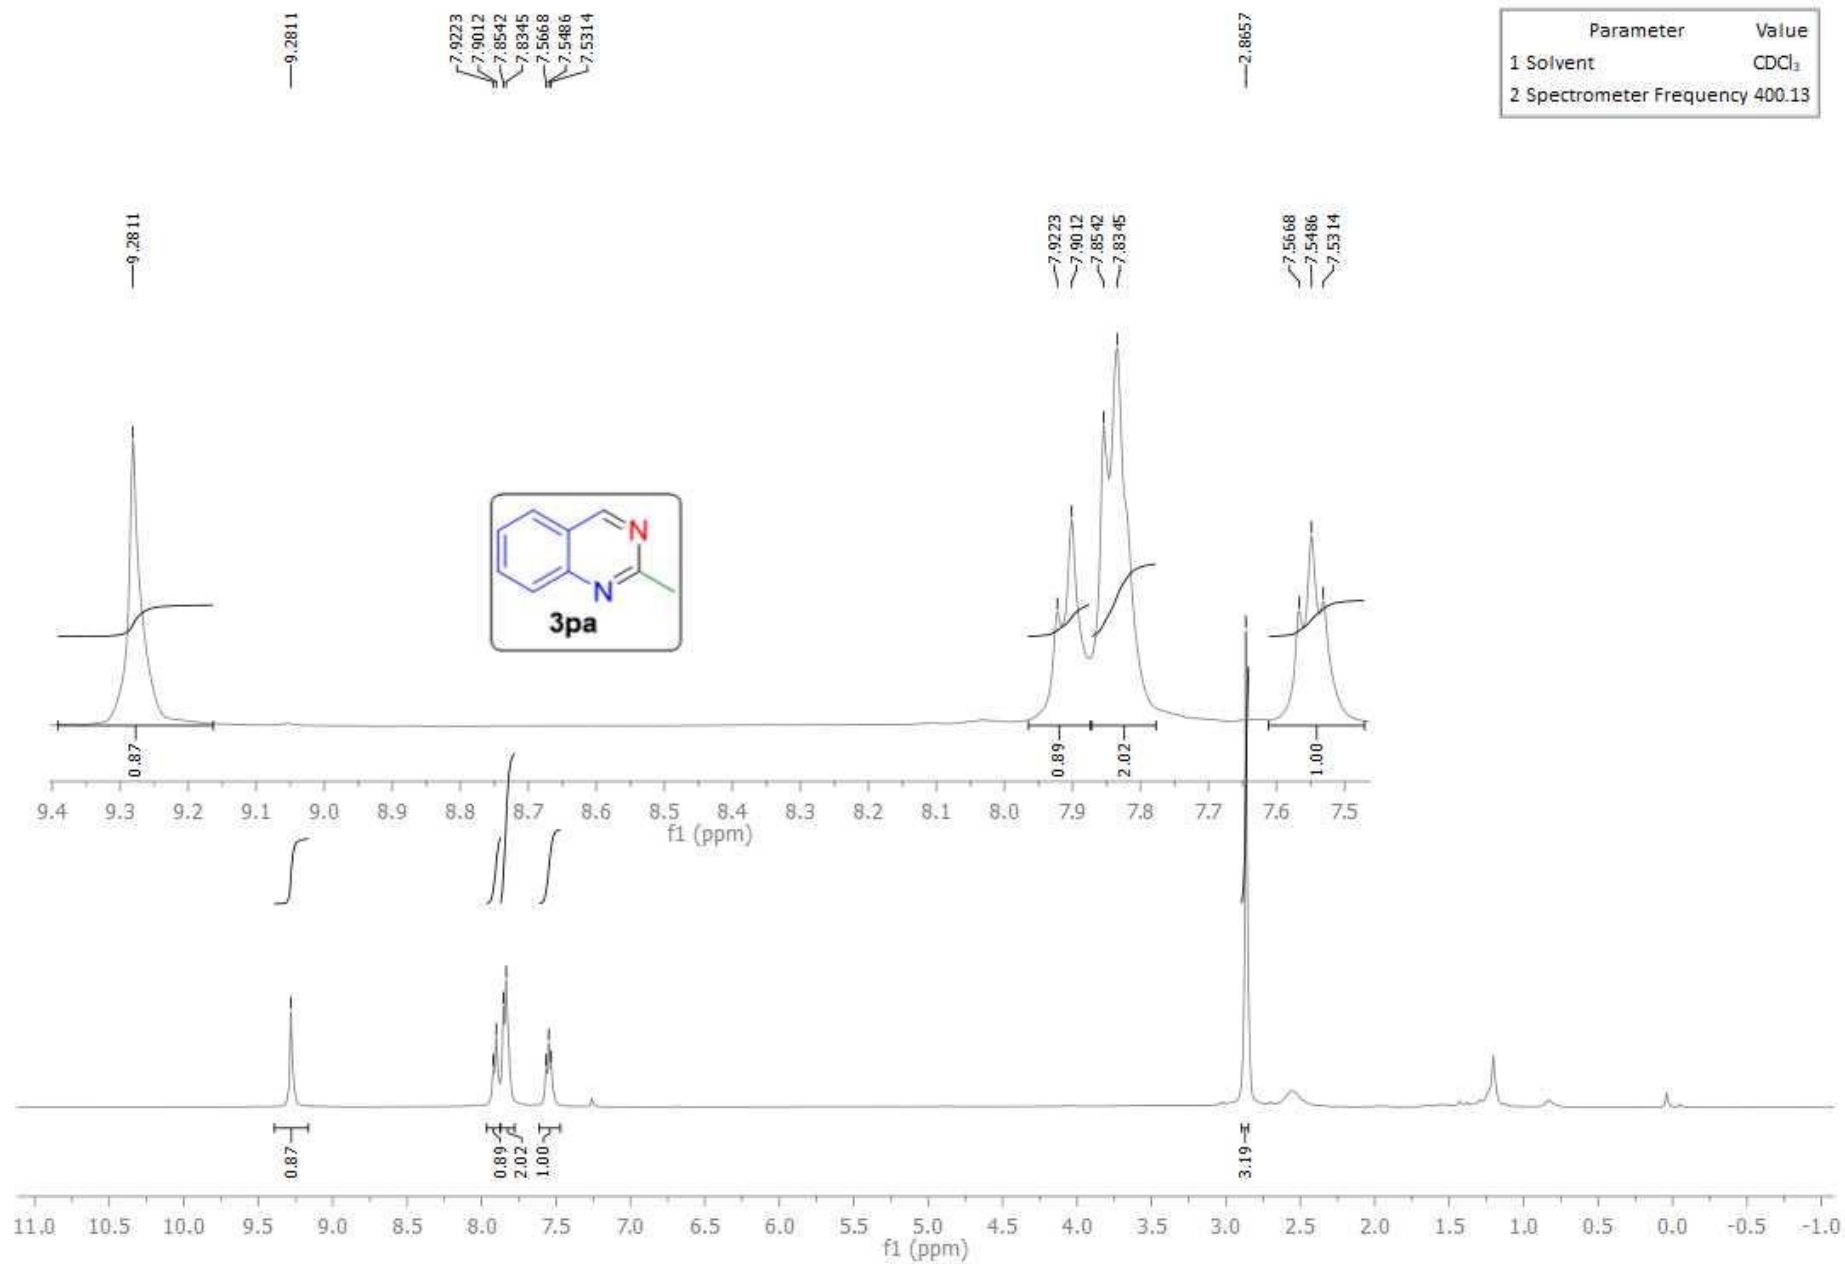

**Figure S36.** <sup>1</sup>H NMR Spectrum of 2-methylquinazoline (**3pa**)

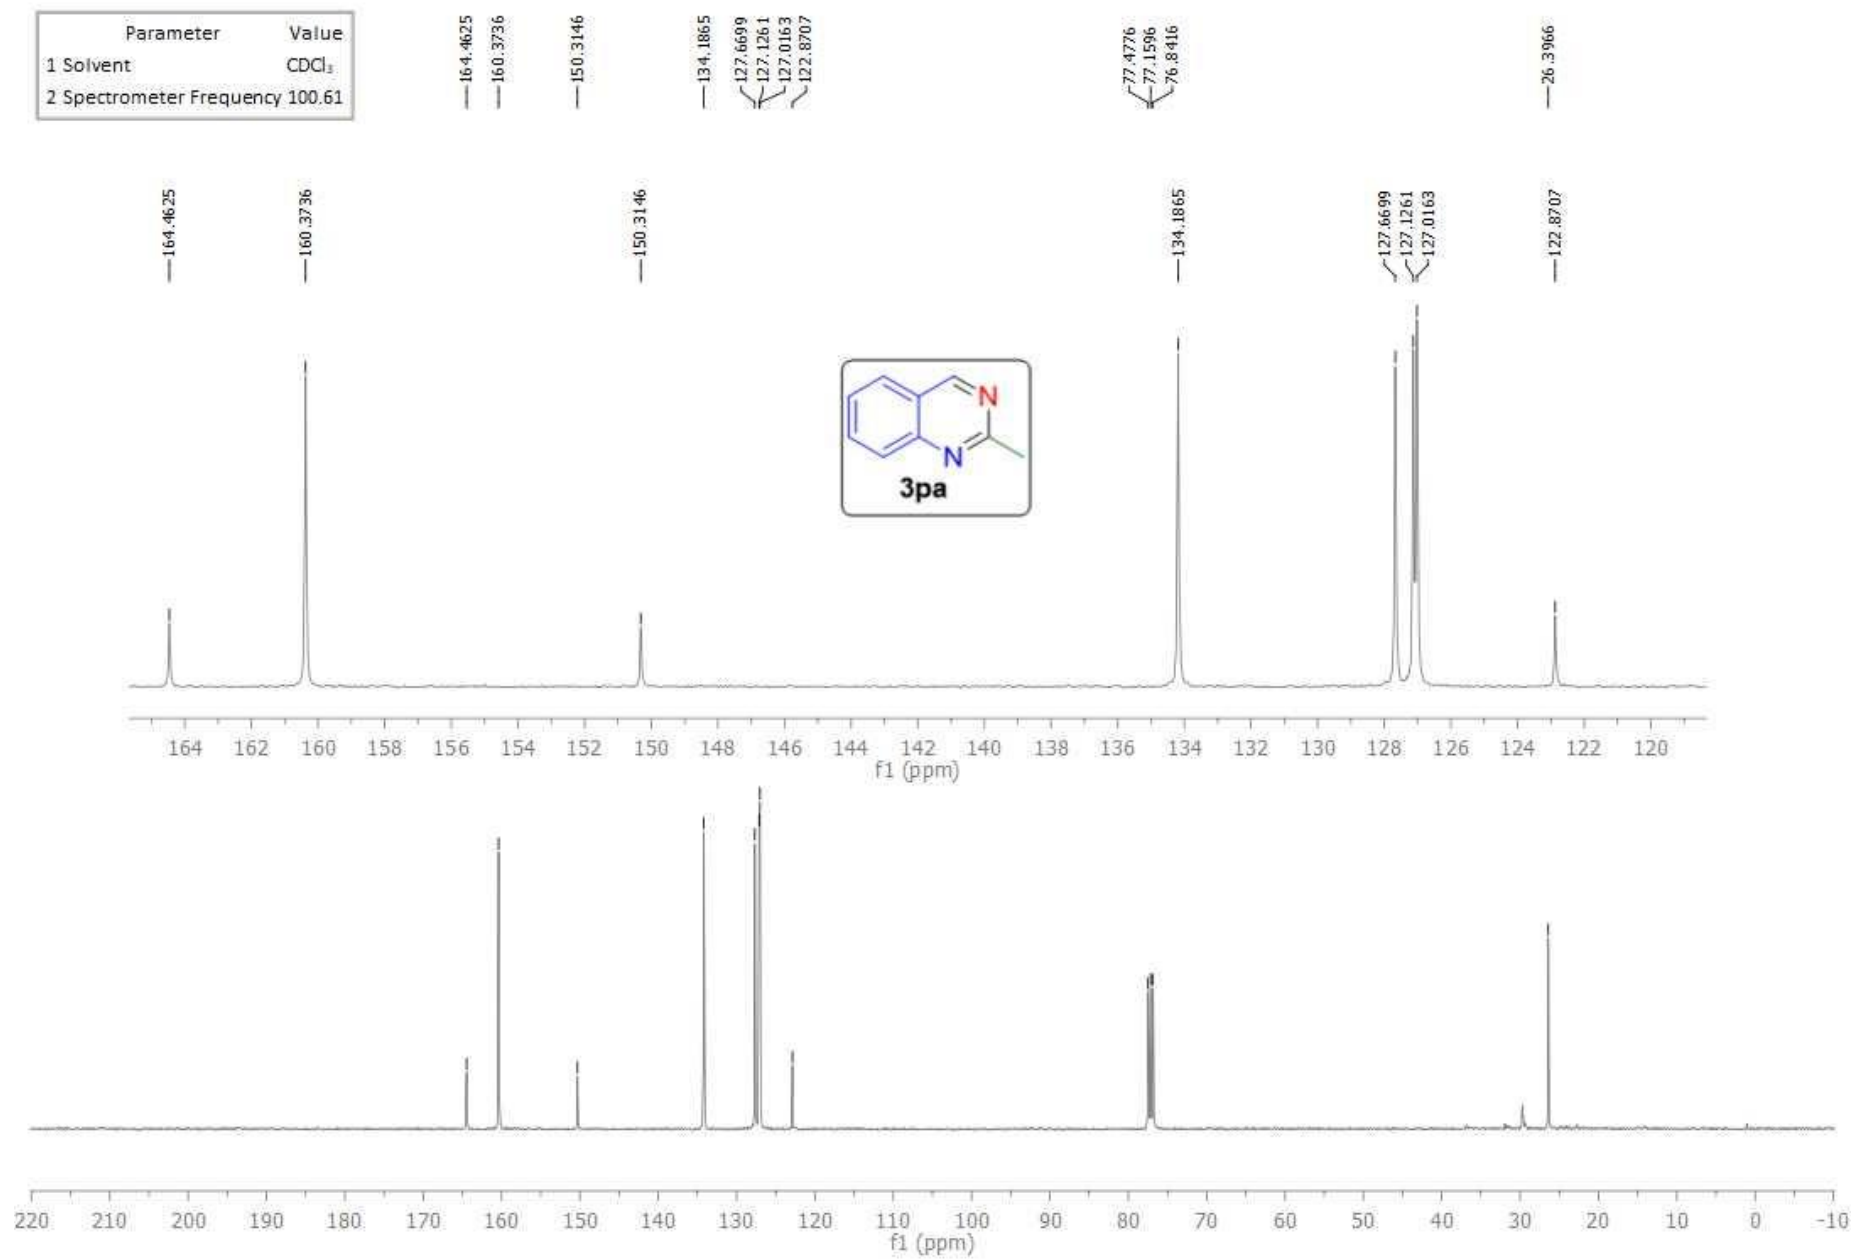

**Figure S37.** <sup>13</sup>C NMR Spectrum of 2-methylquinazoline (**3pa**)

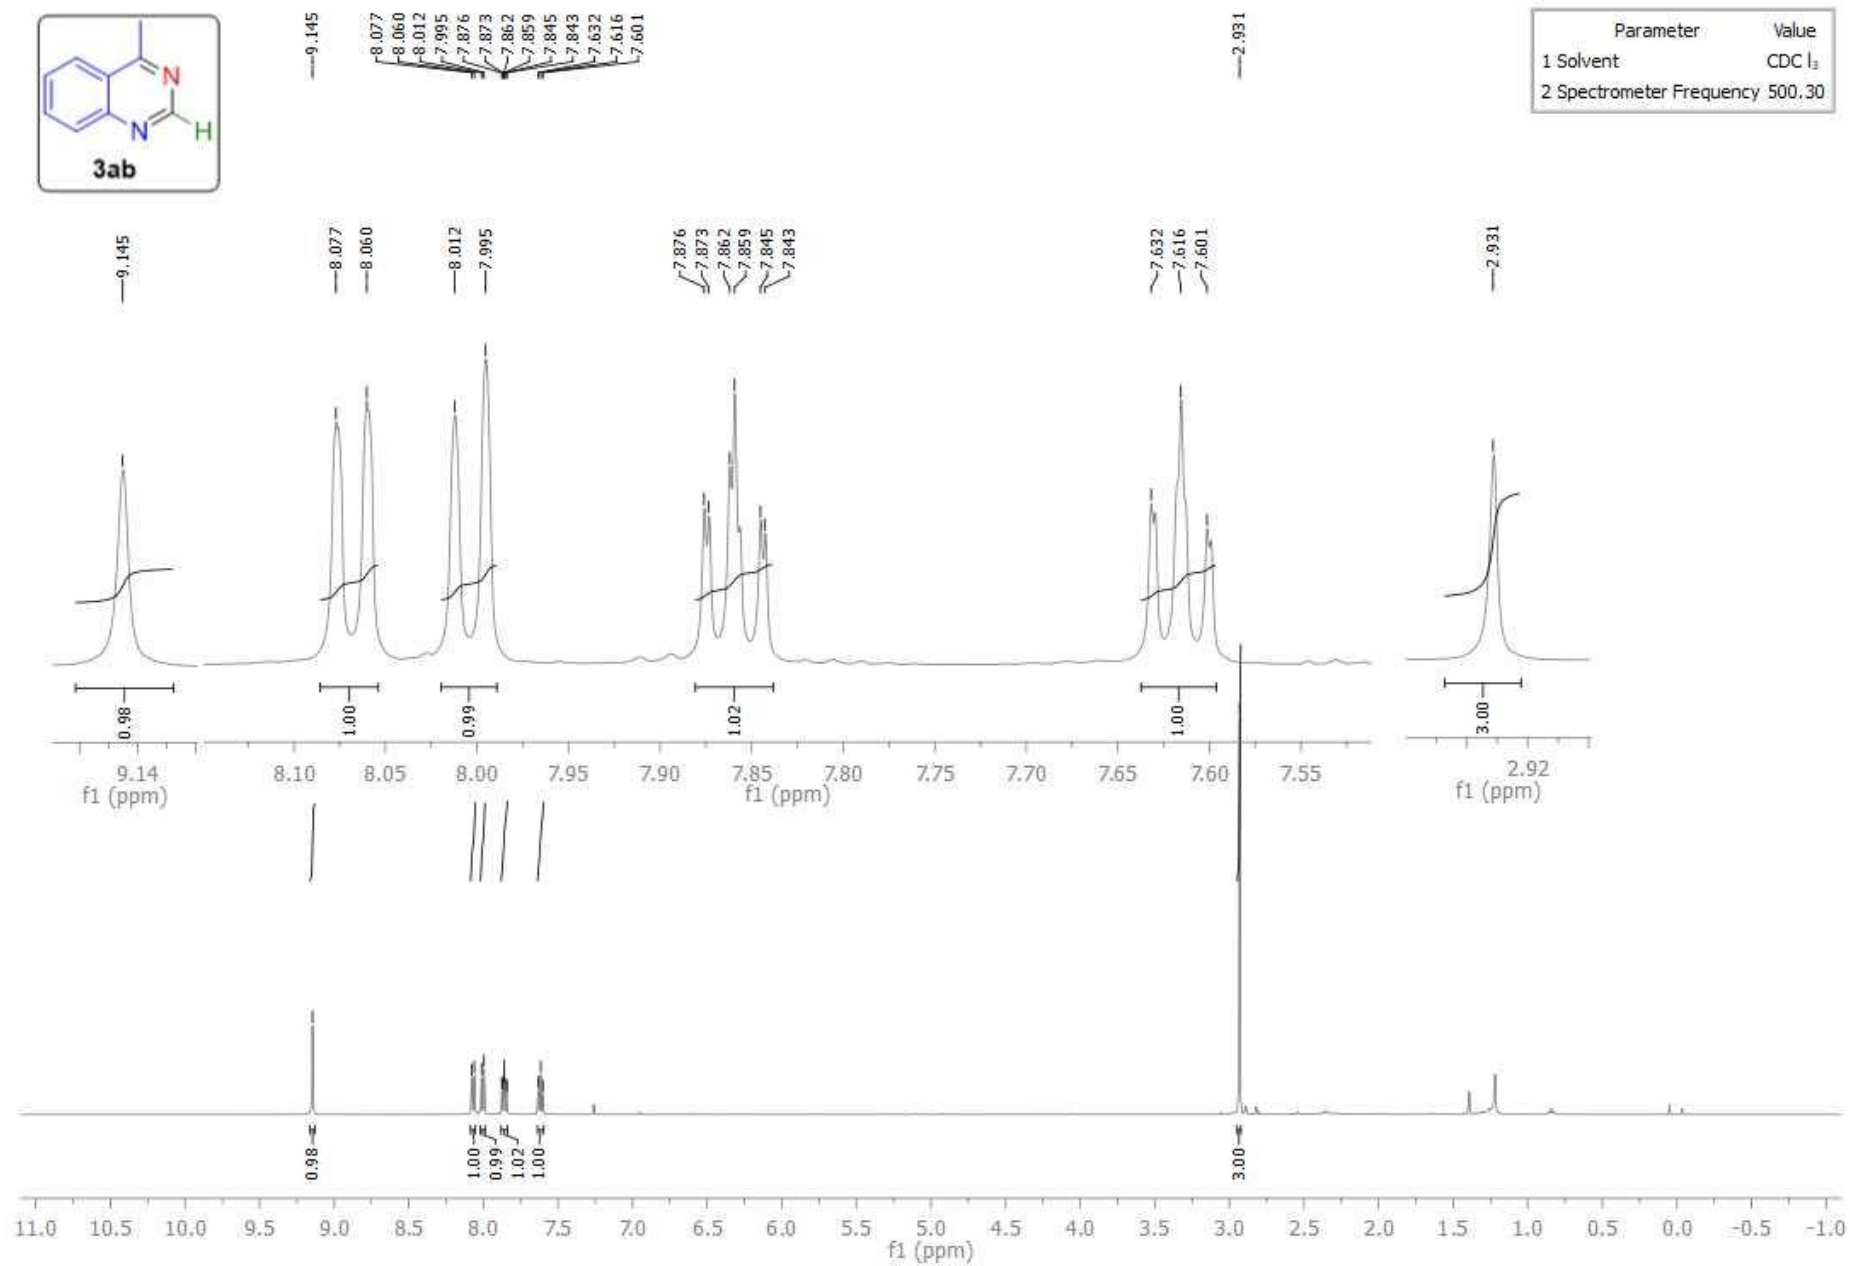

**Figure S38.** <sup>1</sup>H NMR Spectrum of 4-Methylquinazoline (**3ab**)

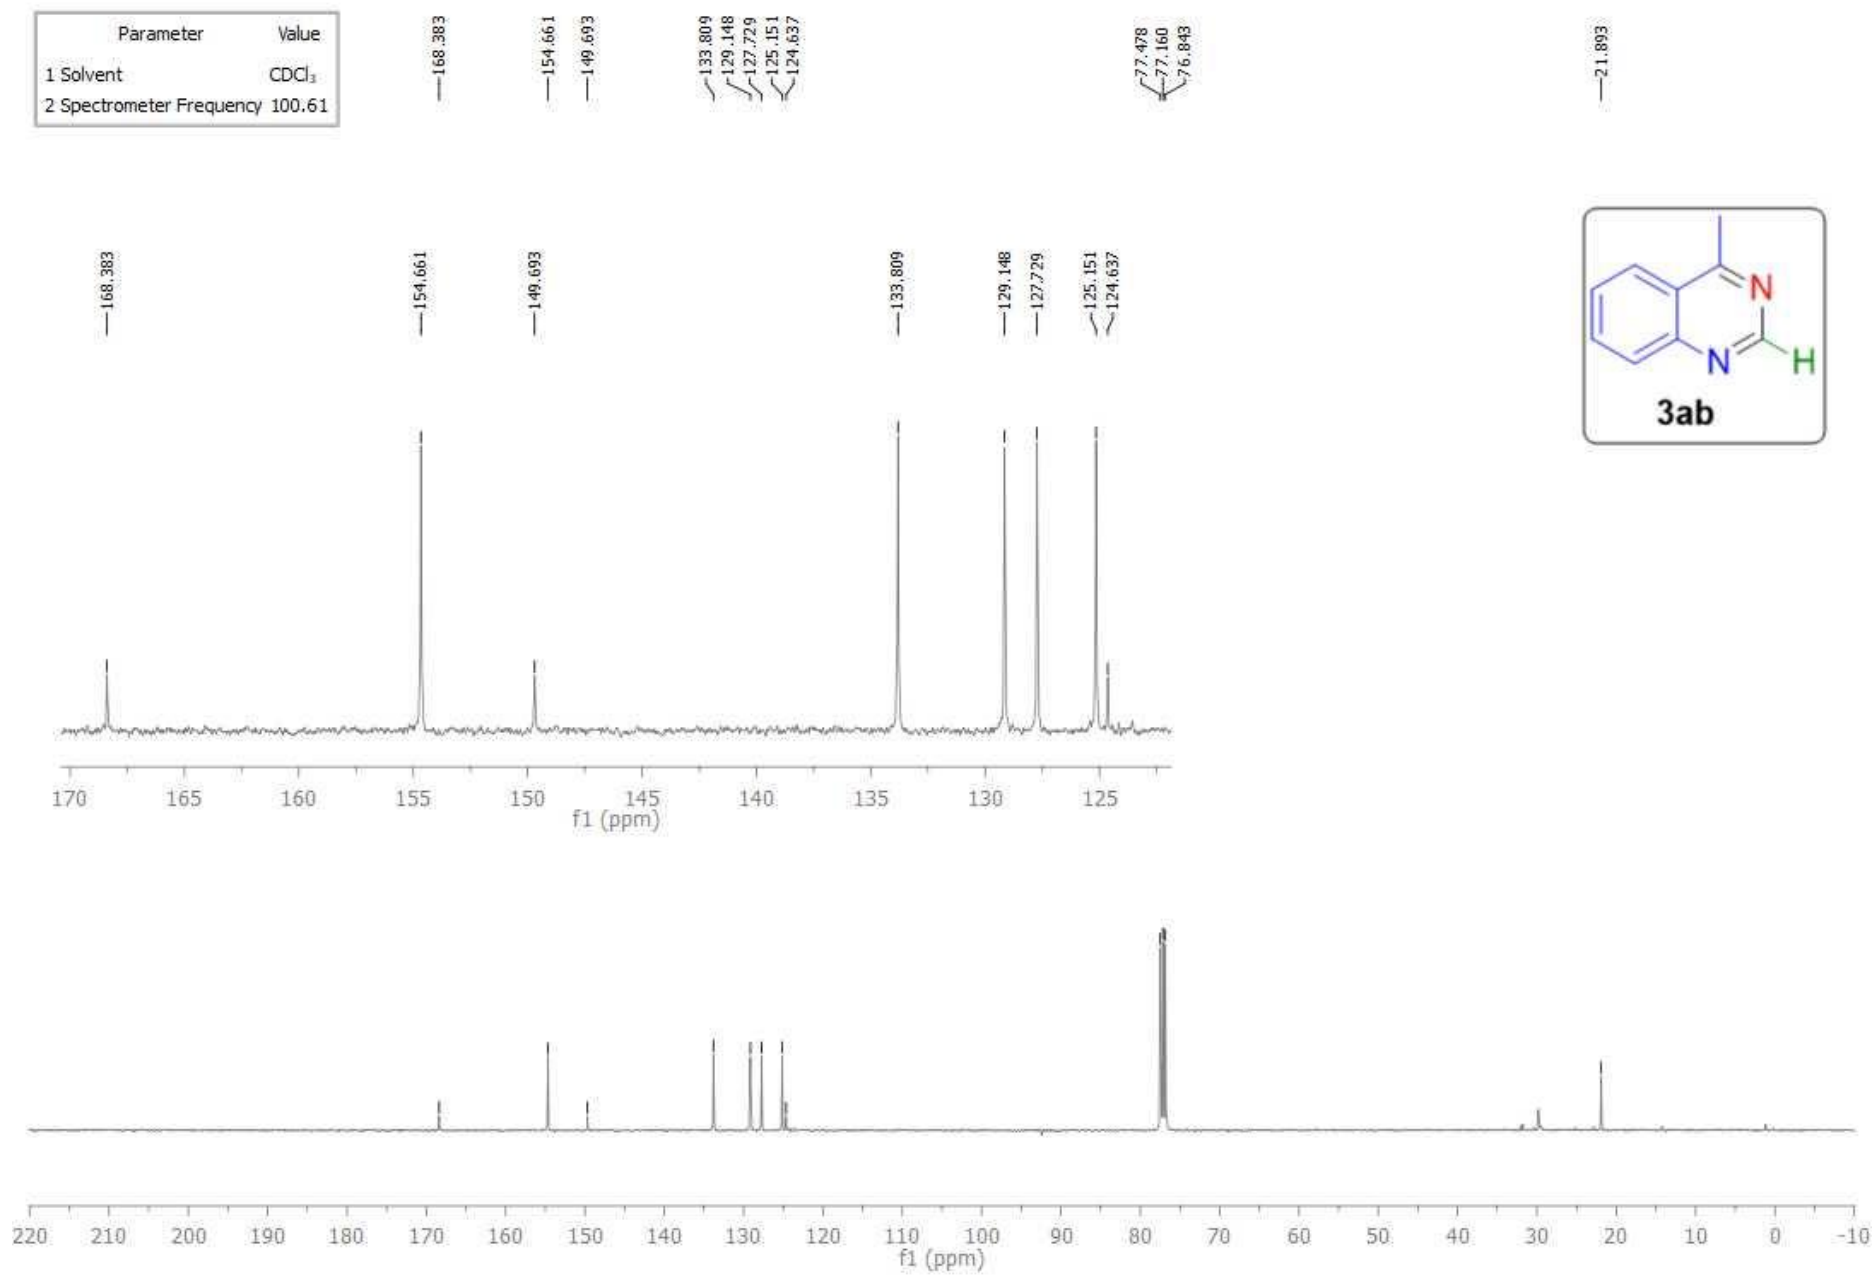

**Figure S39.** <sup>13</sup>C NMR Spectrum of 4-Methylquinazoline (**3ab**)

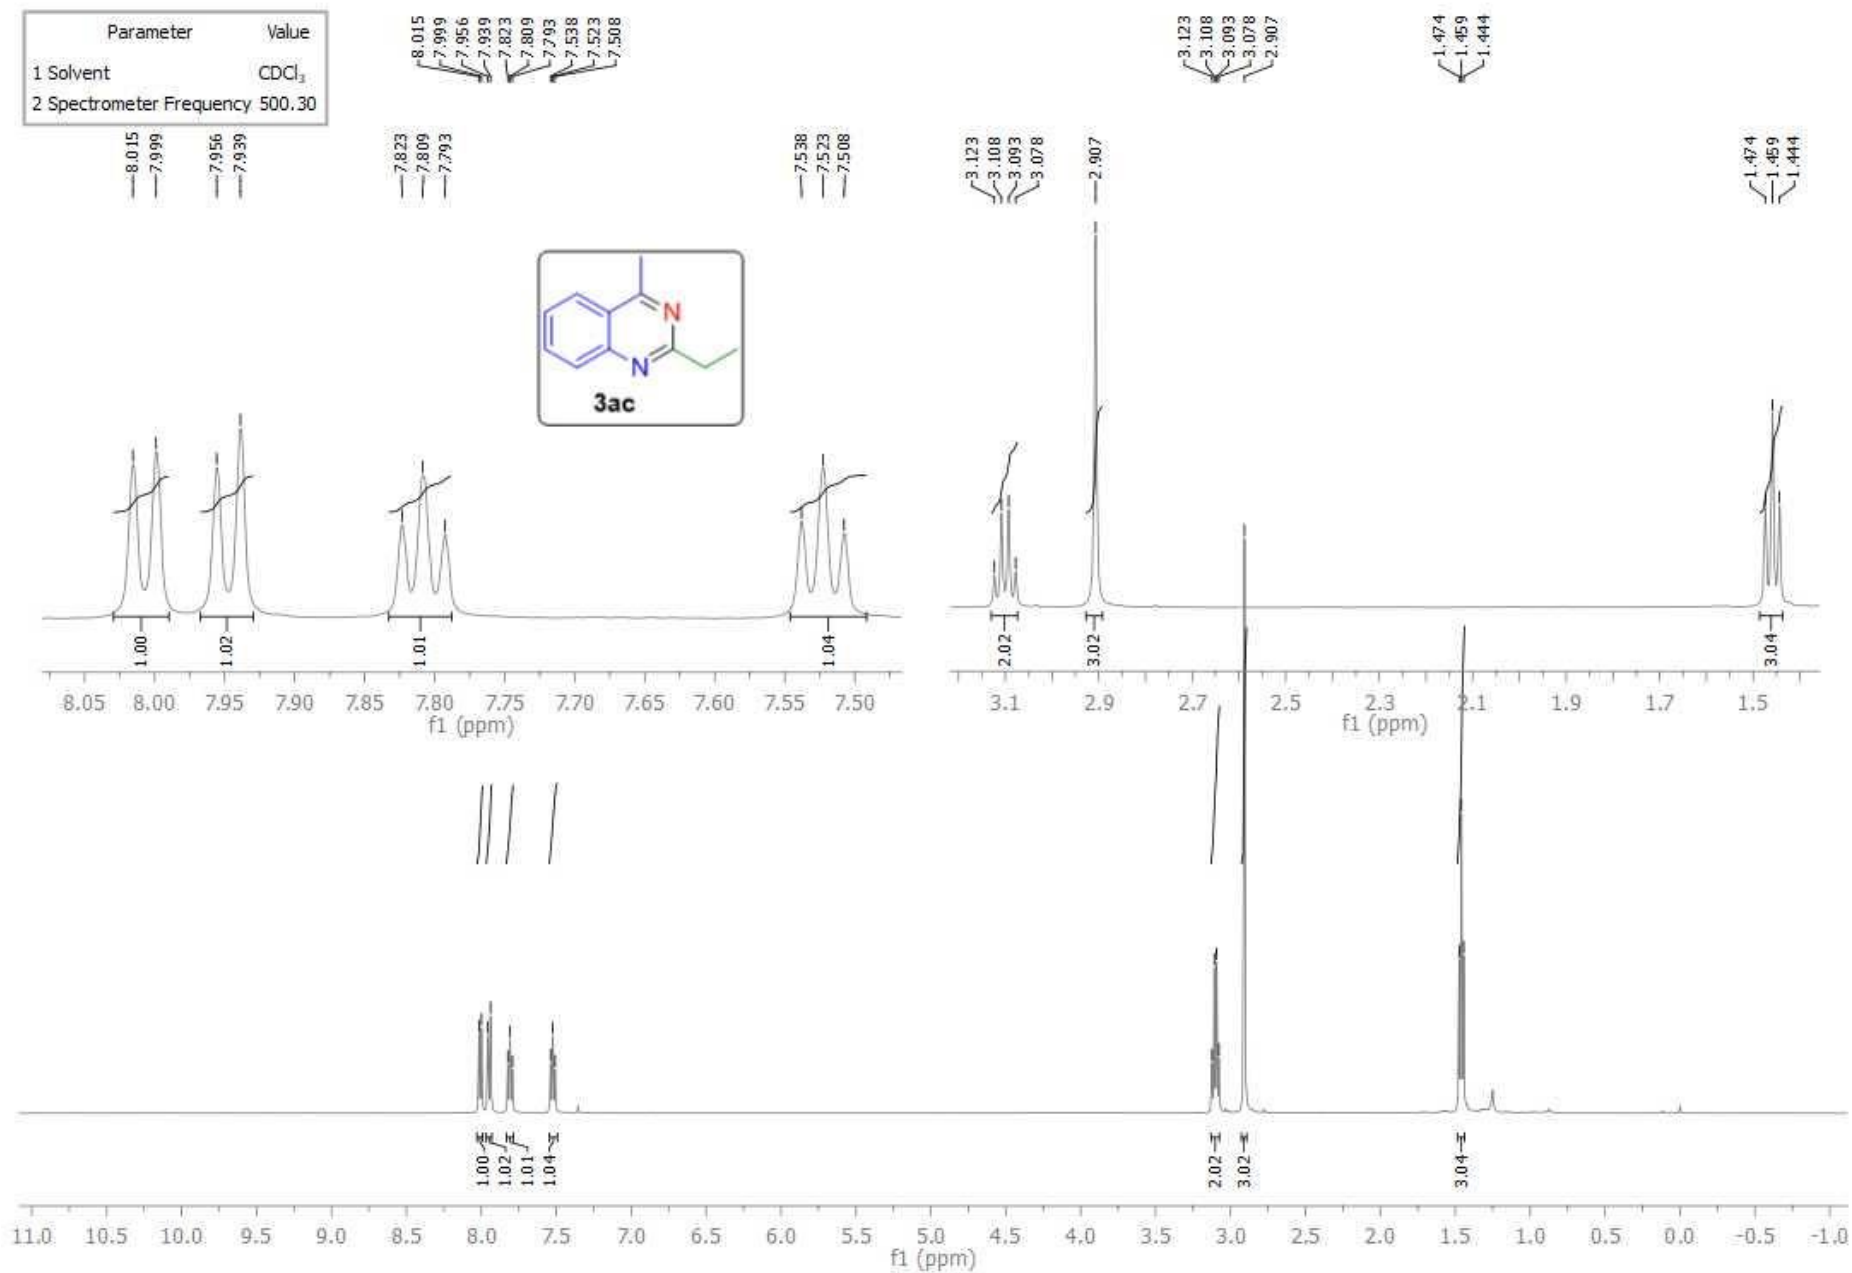

**Figure S40.**  $^1\text{H}$  NMR Spectrum of 2-Ethyl-4-methylquinazoline (**3ac**)

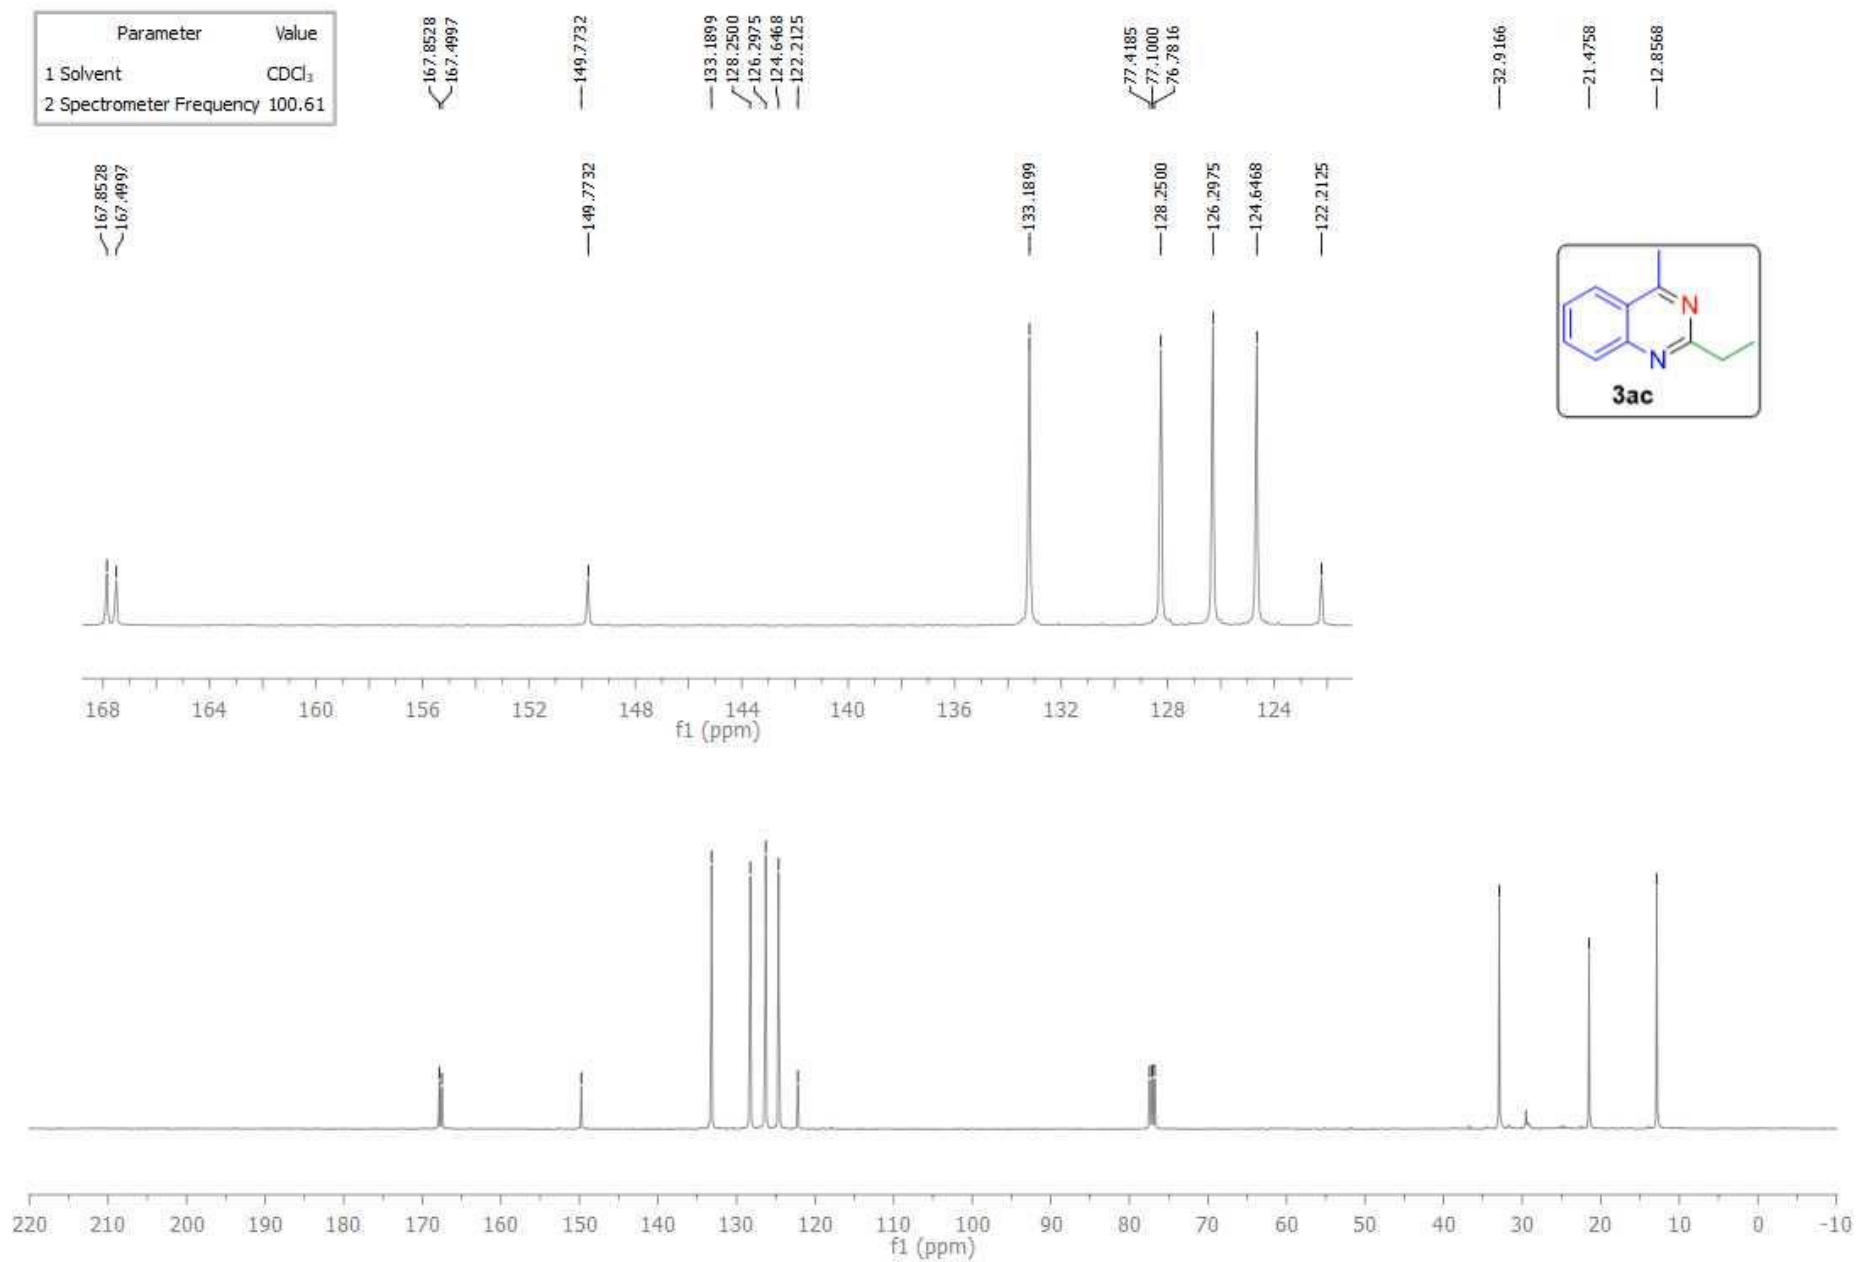

**Figure S41.** <sup>13</sup>C NMR Spectrum of 2-Ethyl-4-methylquinazoline (**3ac**)

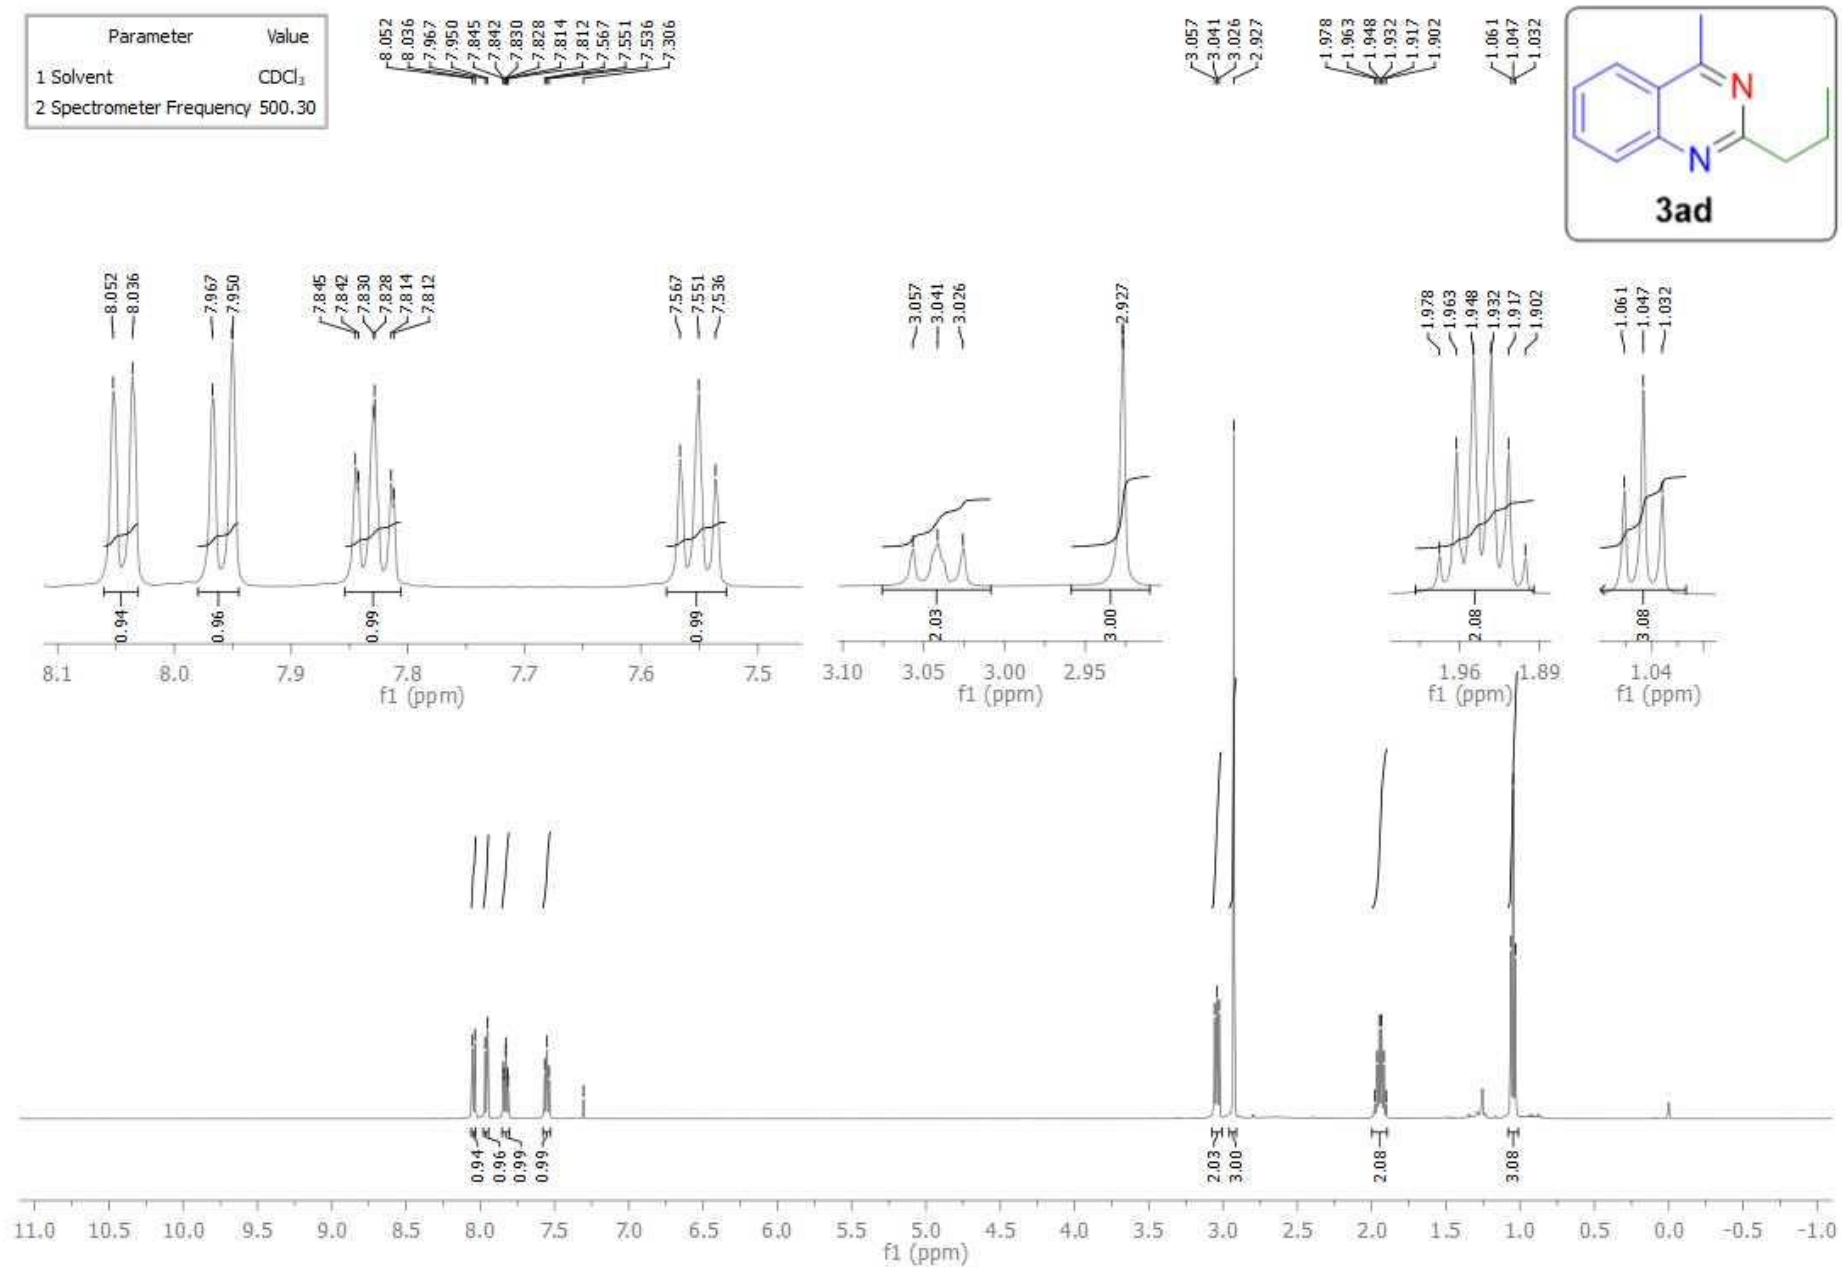

**Figure S42.** <sup>1</sup>H NMR Spectrum of 4-Methyl-2-propylquinazoline (**3ad**)

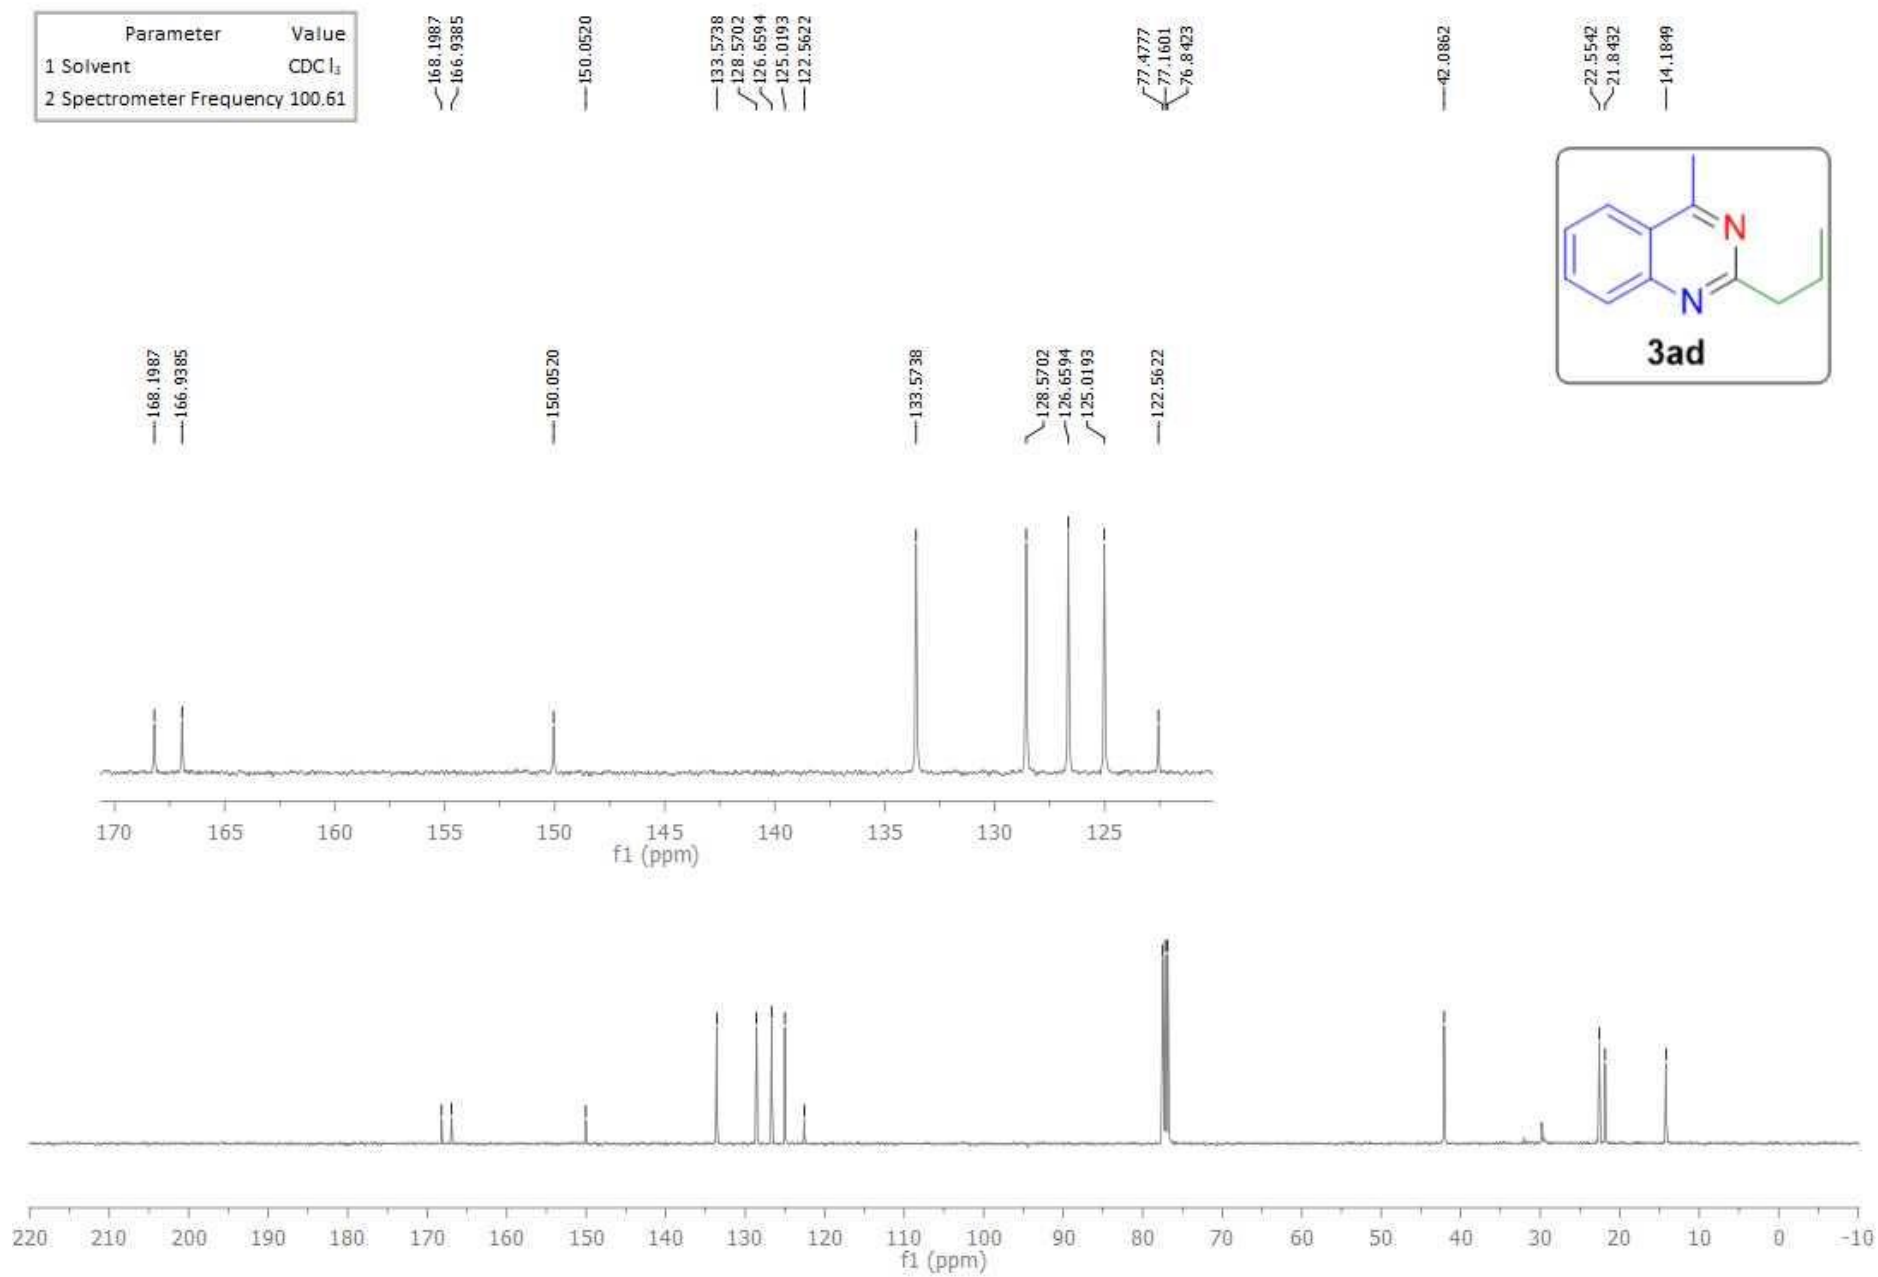

**Figure S43.** <sup>13</sup>C NMR Spectrum of 4-Methyl-2-propylquinazoline (**3ad**)



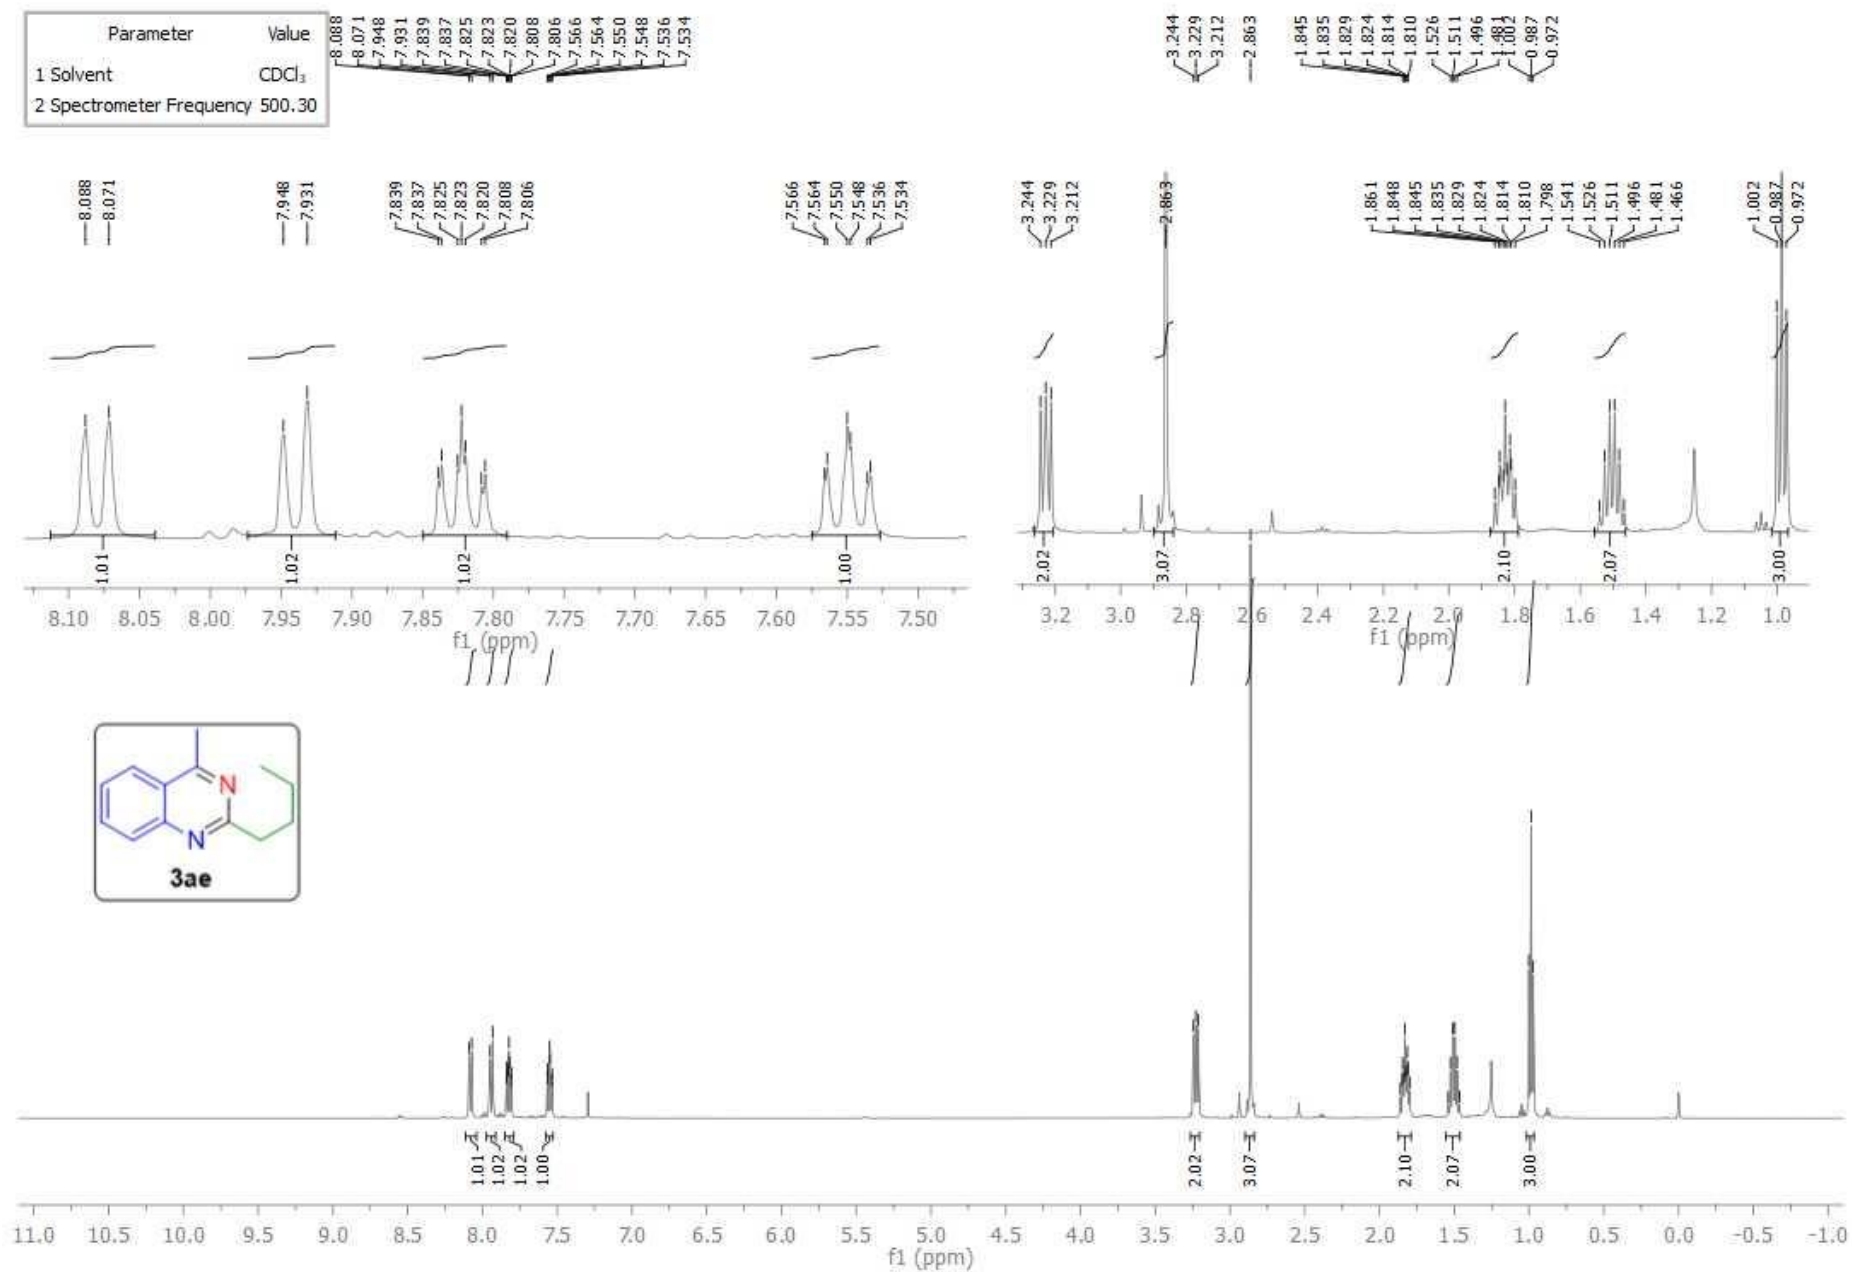

**Figure S44.** <sup>1</sup>H NMR Spectrum of 2-Butyl-4-methylquinazoline (**3ae**)

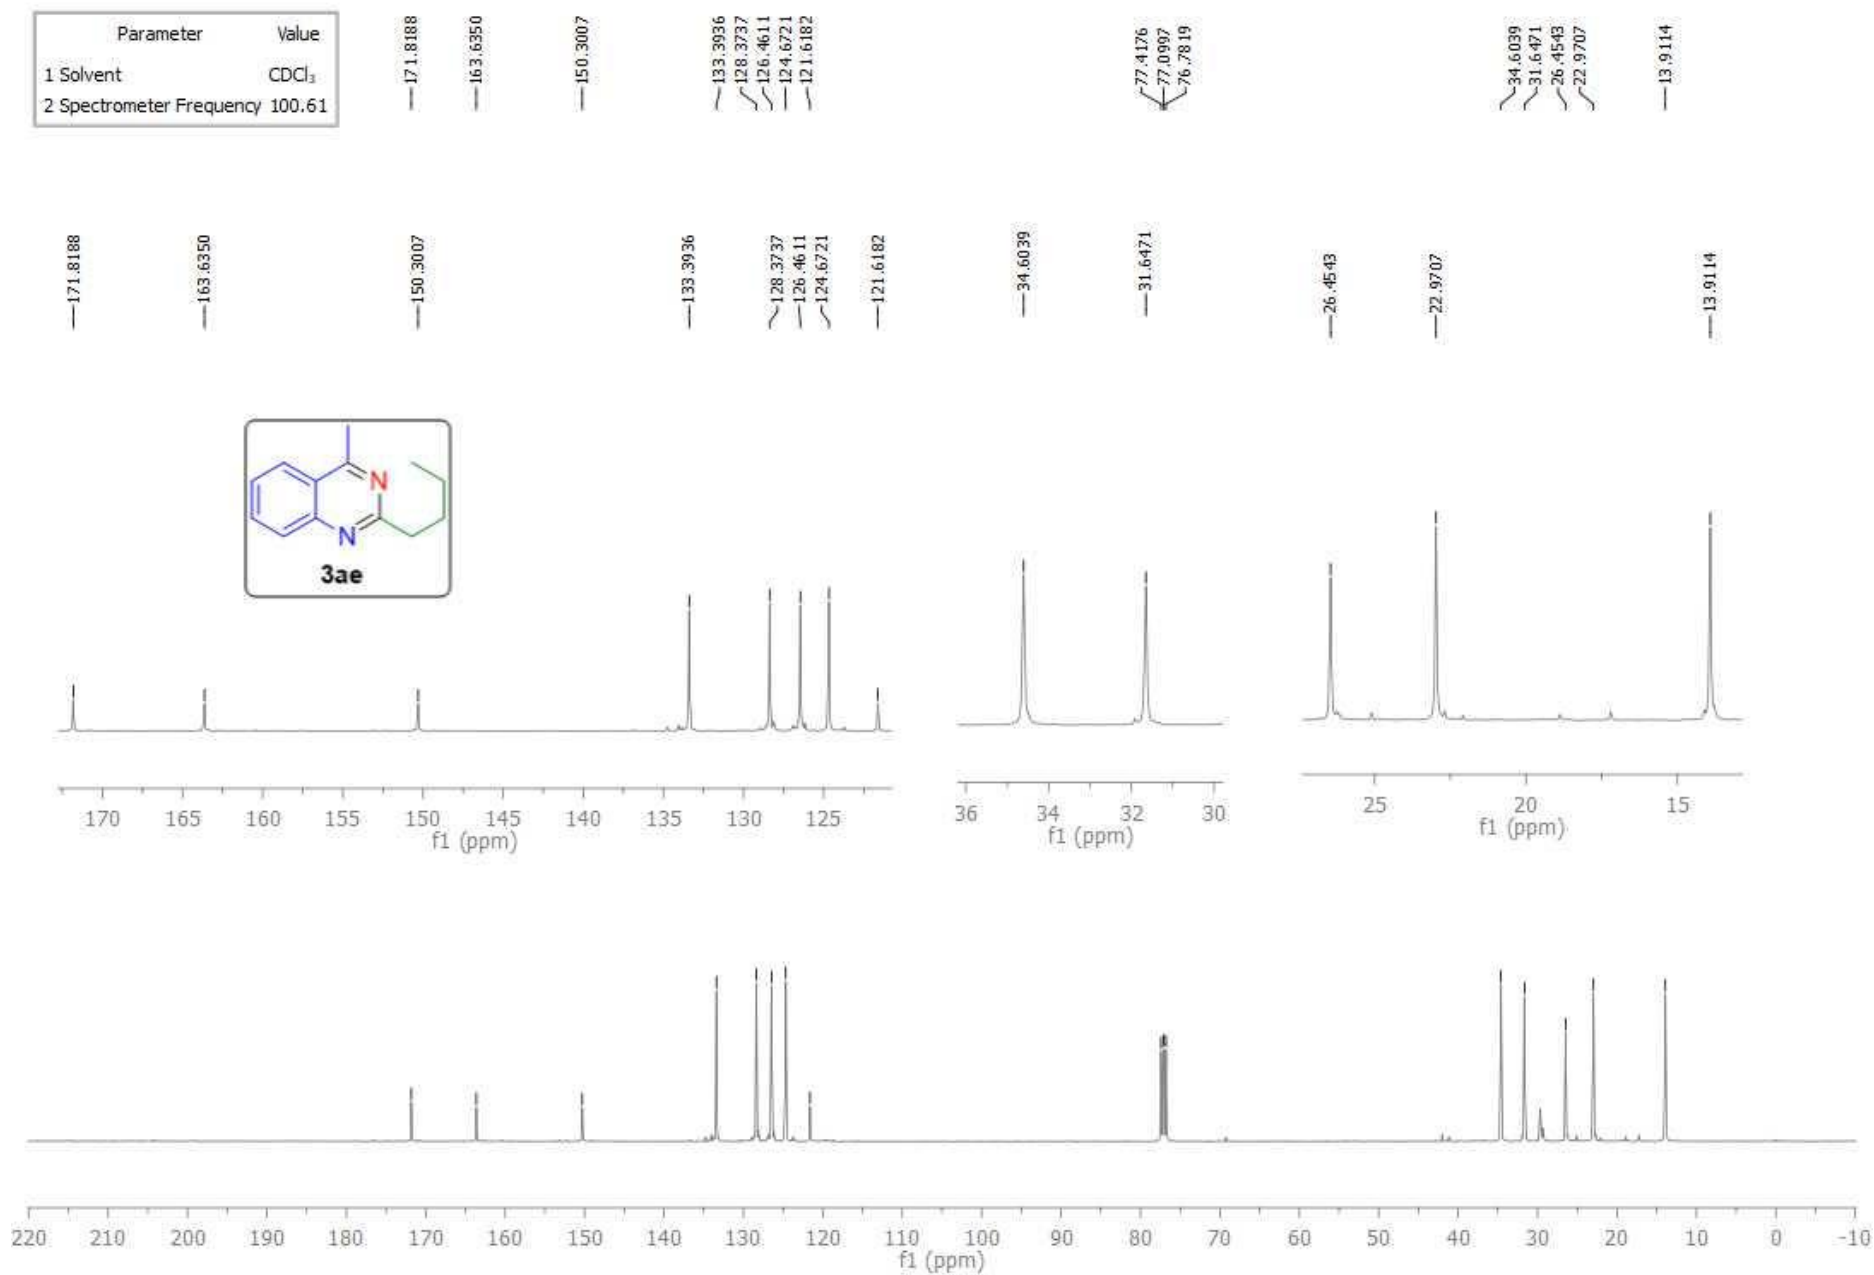

**Figure S45.** <sup>13</sup>C NMR Spectrum of 2-Butyl-4-methylquinazoline (**3ae**)

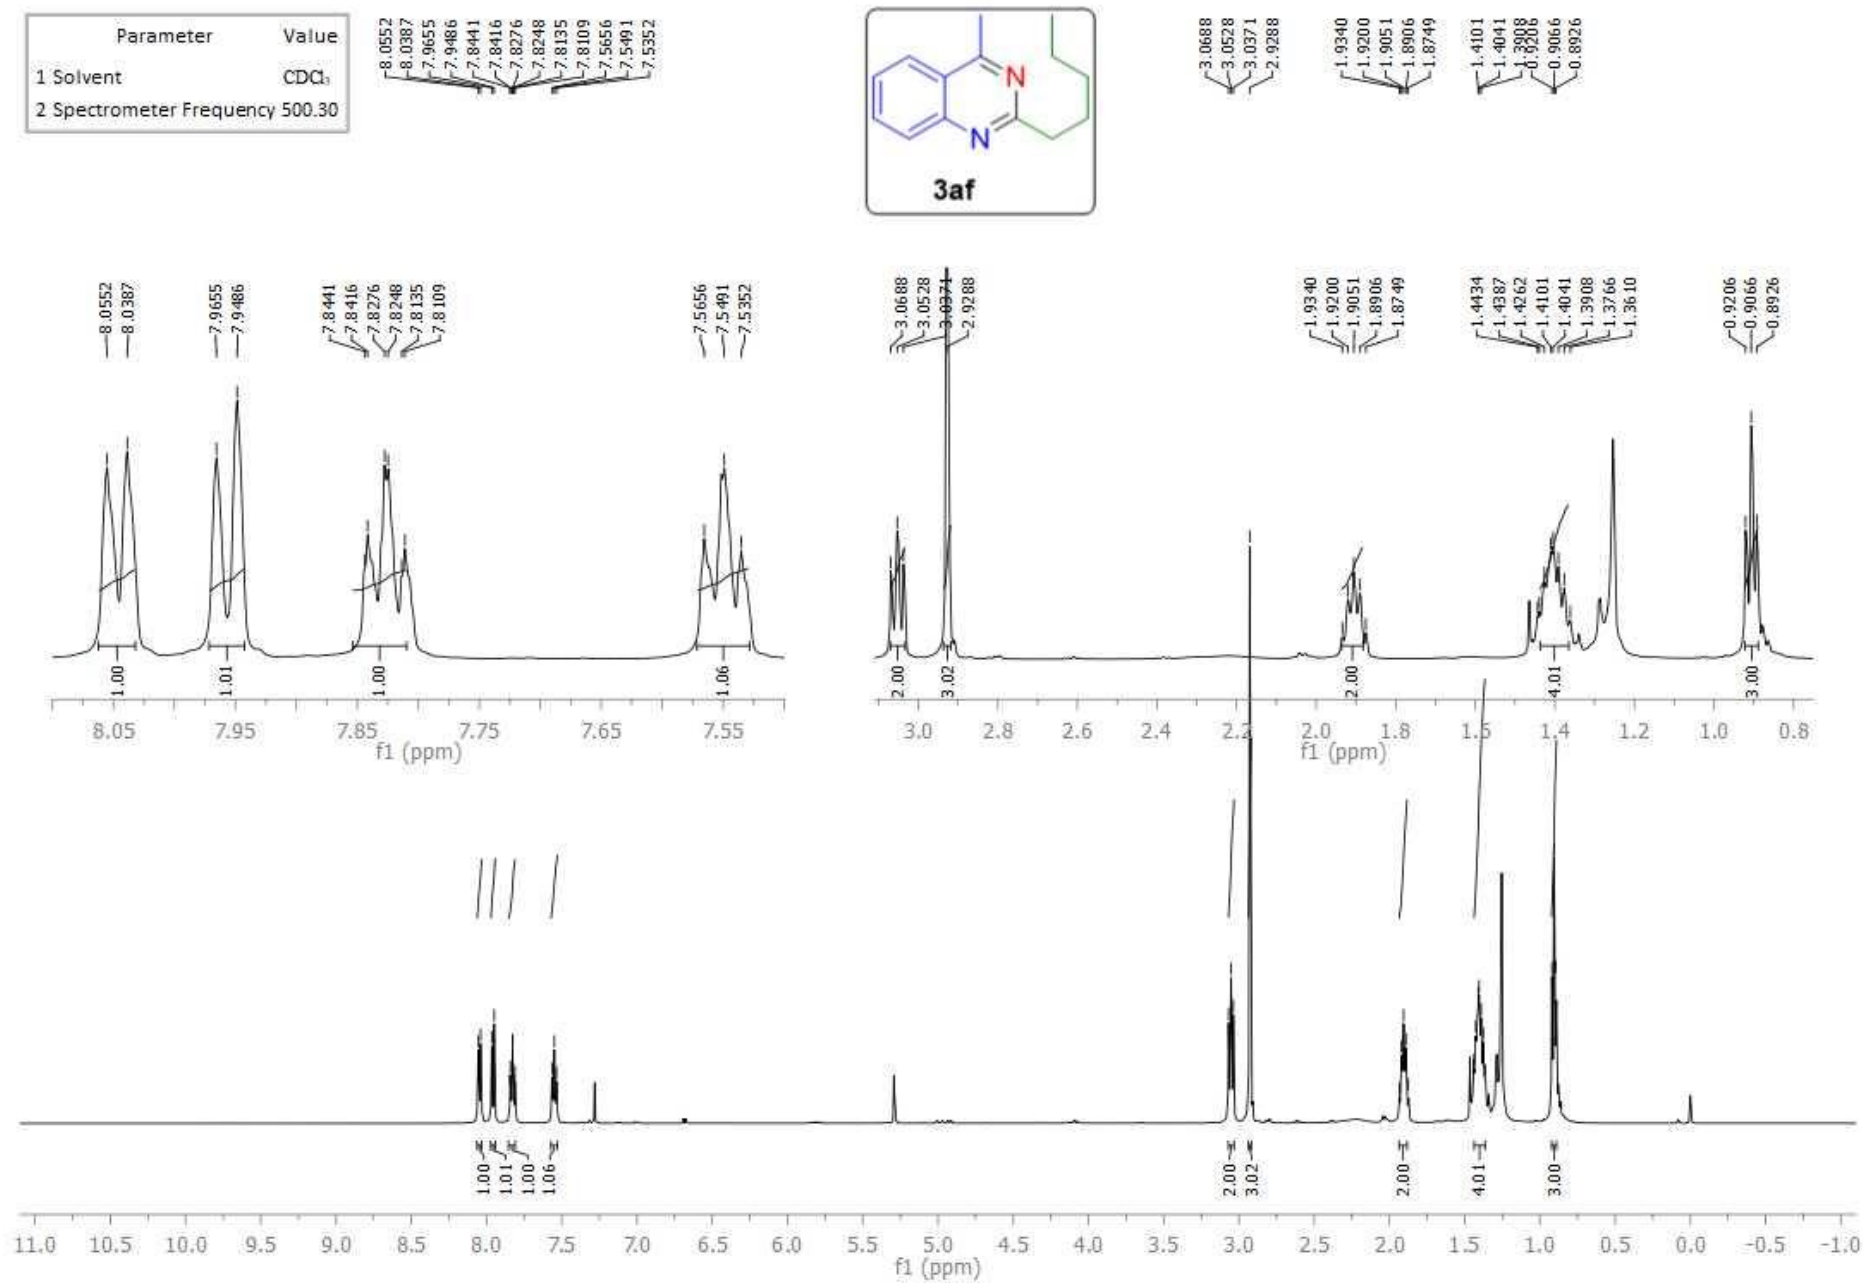

**Figure S46.** <sup>1</sup>H NMR Spectrum of 4-Methyl-2-pentylquinazoline (**3af**)

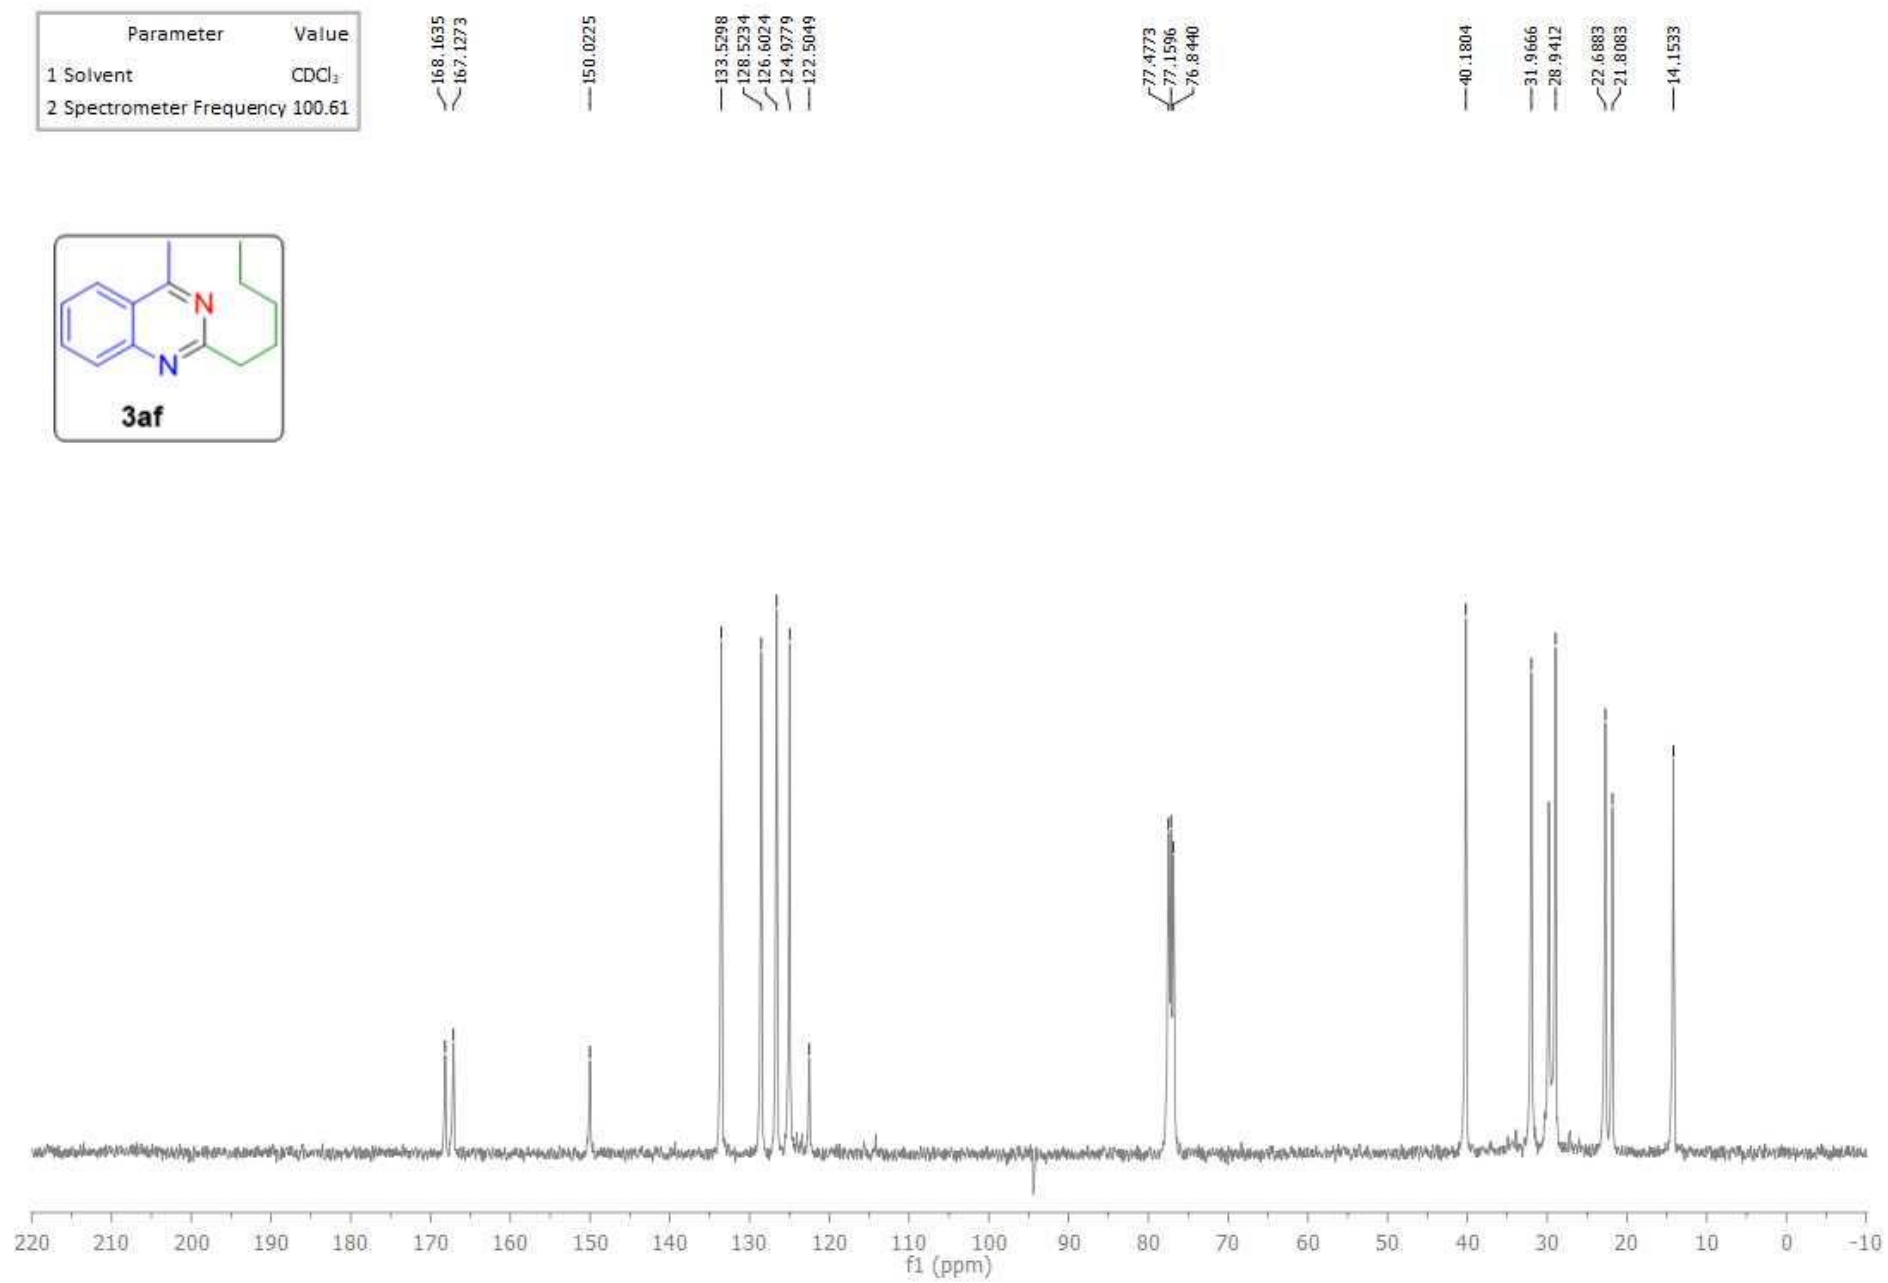

**Figure S47.** <sup>13</sup>C NMR Spectrum of 4-Methyl-2-pentylquinazoline (**3af**)

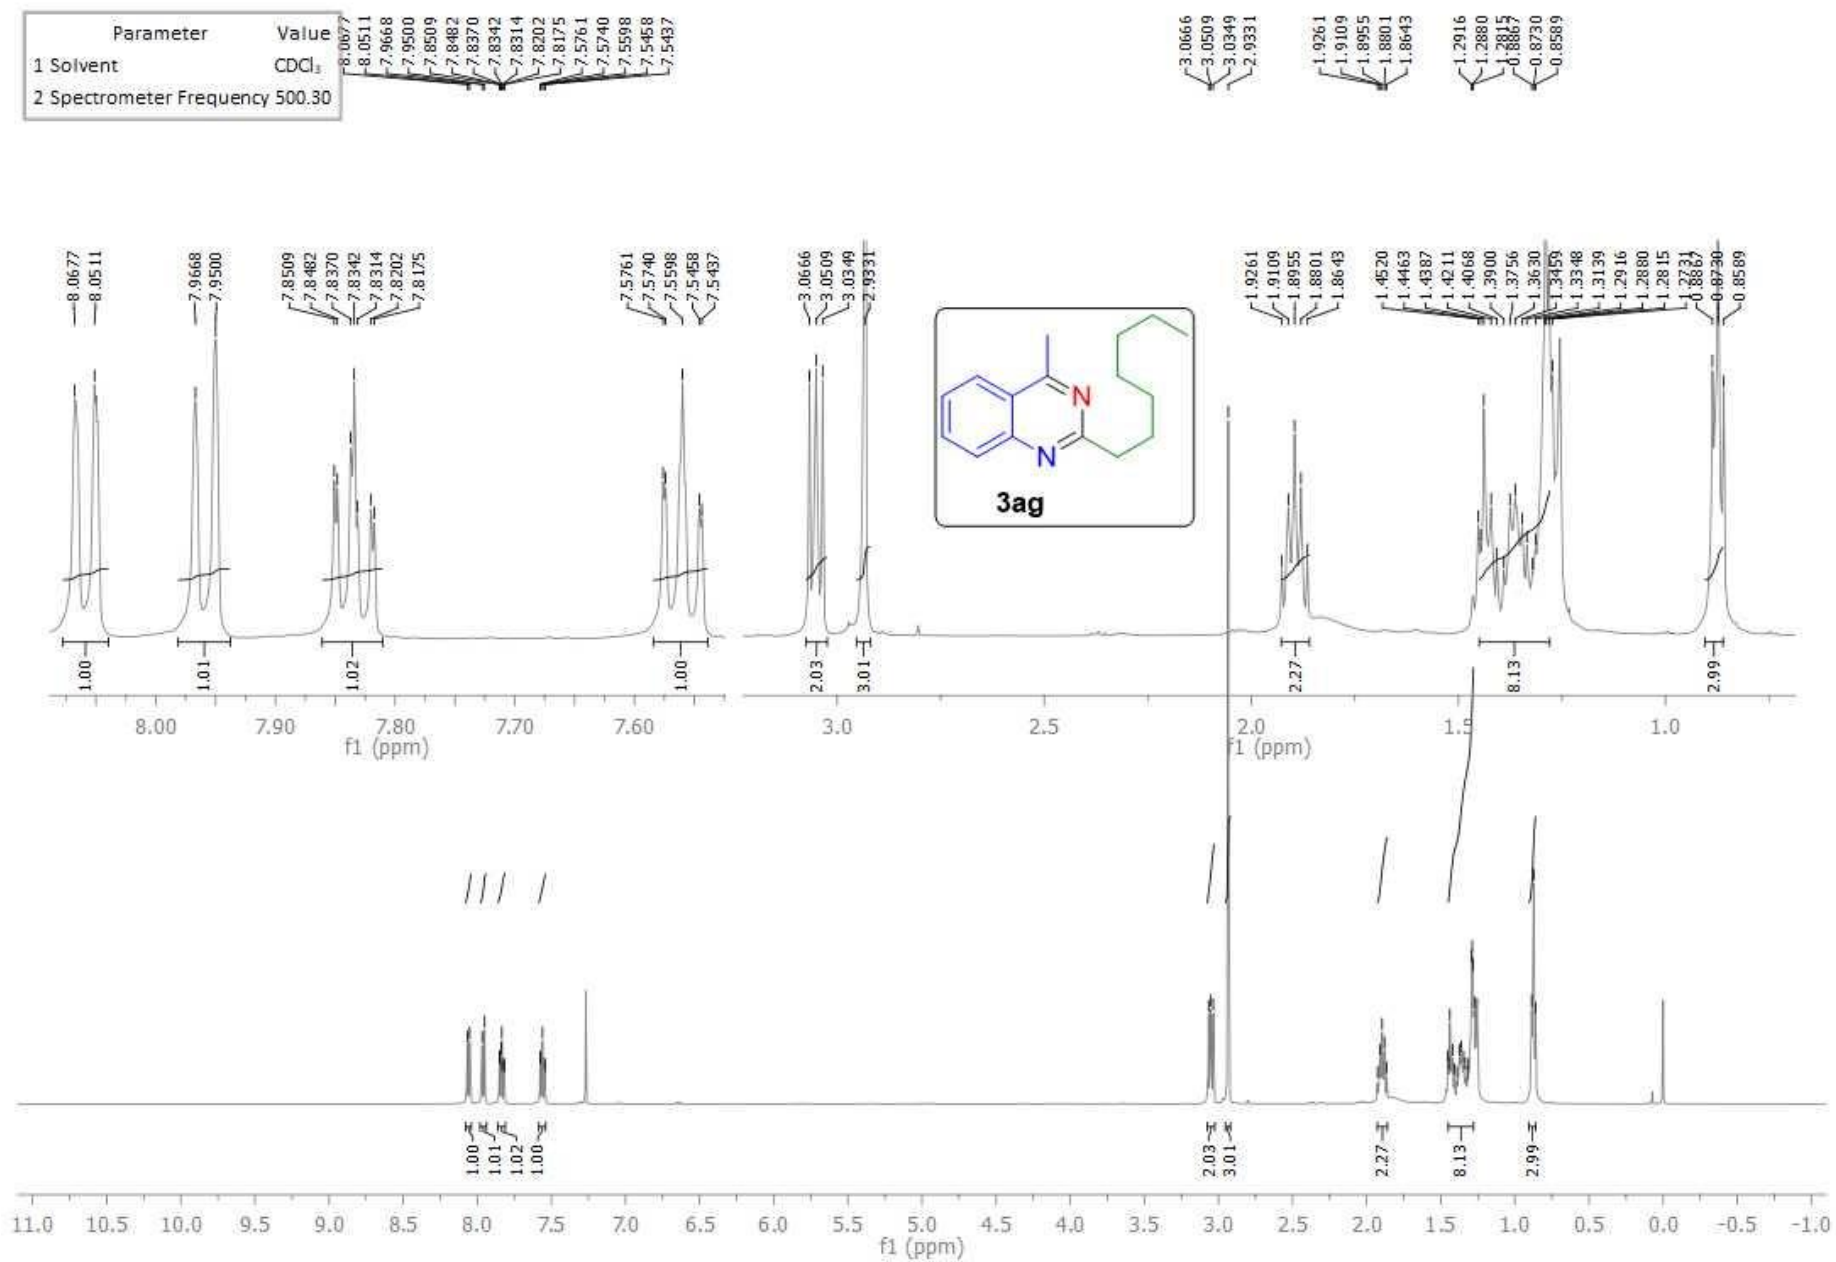

**Figure S48.** <sup>1</sup>H NMR Spectrum of 2-Heptyl-4-methylquinazoline (**3ag**)

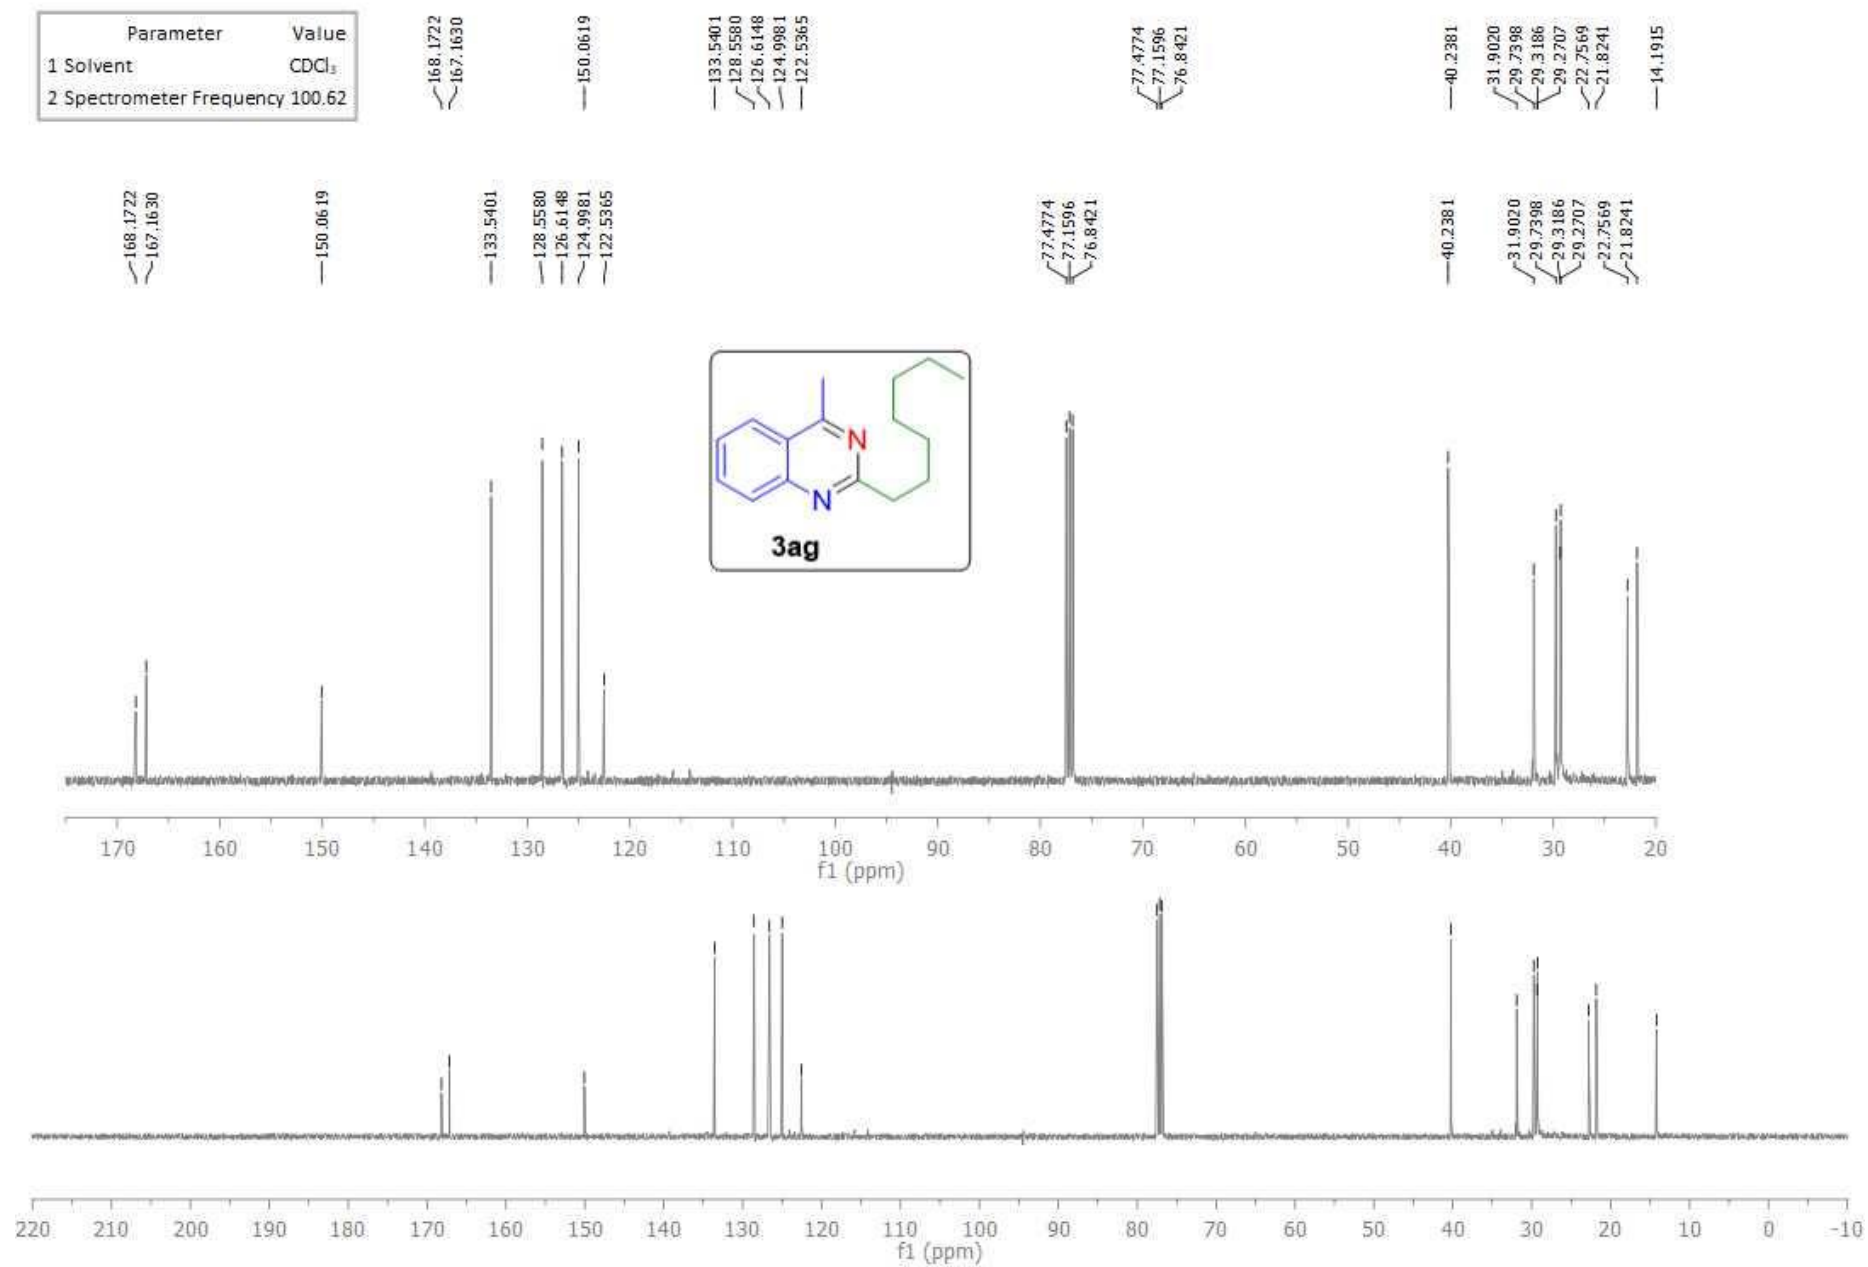

**Figure S49.** <sup>13</sup>C NMR Spectrum of 2-Heptyl-4-methylquinazoline (**3ag**)

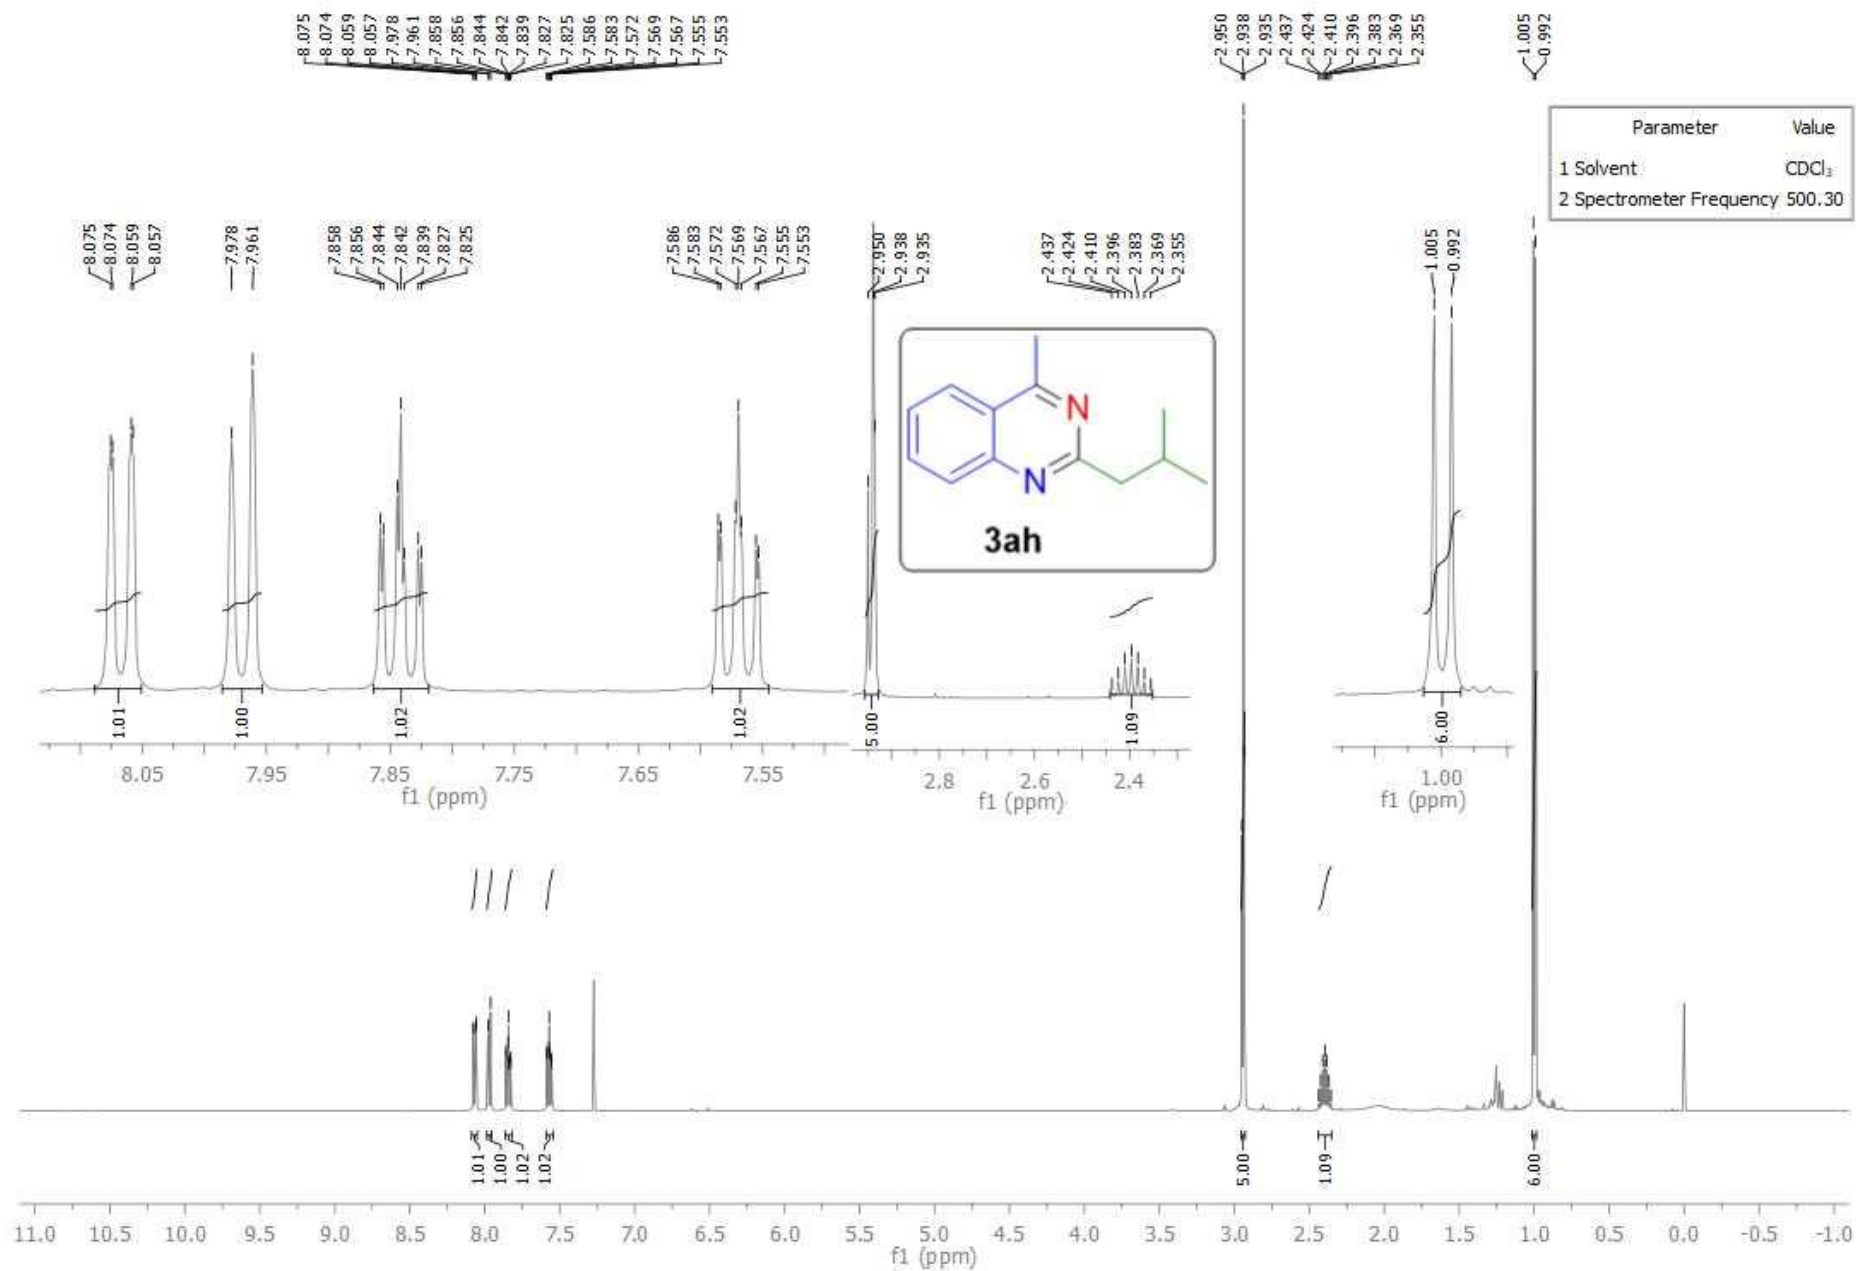

**Figure S50.** <sup>1</sup>H NMR Spectrum of 2-Isobutyl-4-methylquinazoline (**3ah**)

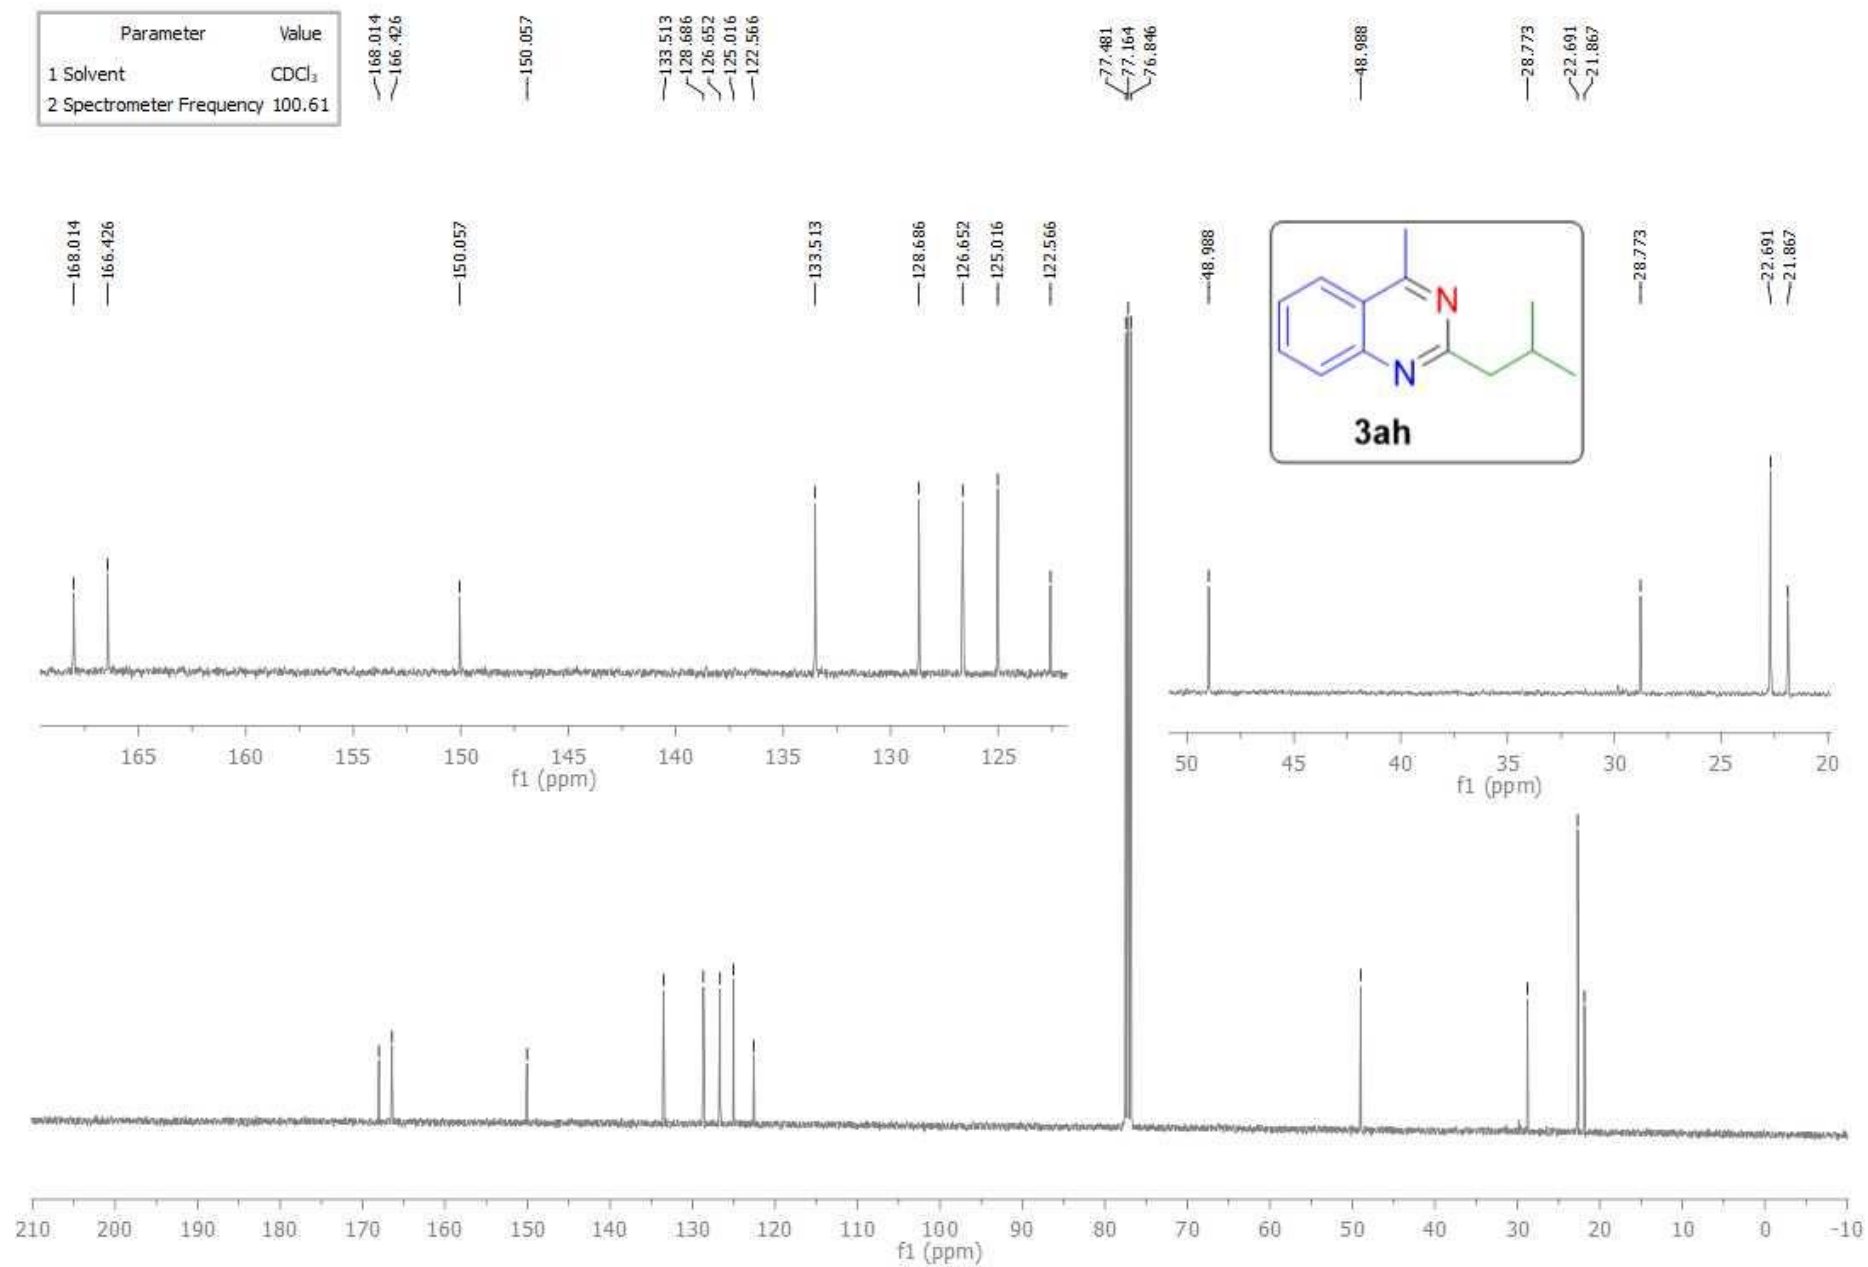

**Figure S51.** <sup>13</sup>C NMR Spectrum of 2-Isobutyl-4-methylquinazoline (**3ah**)



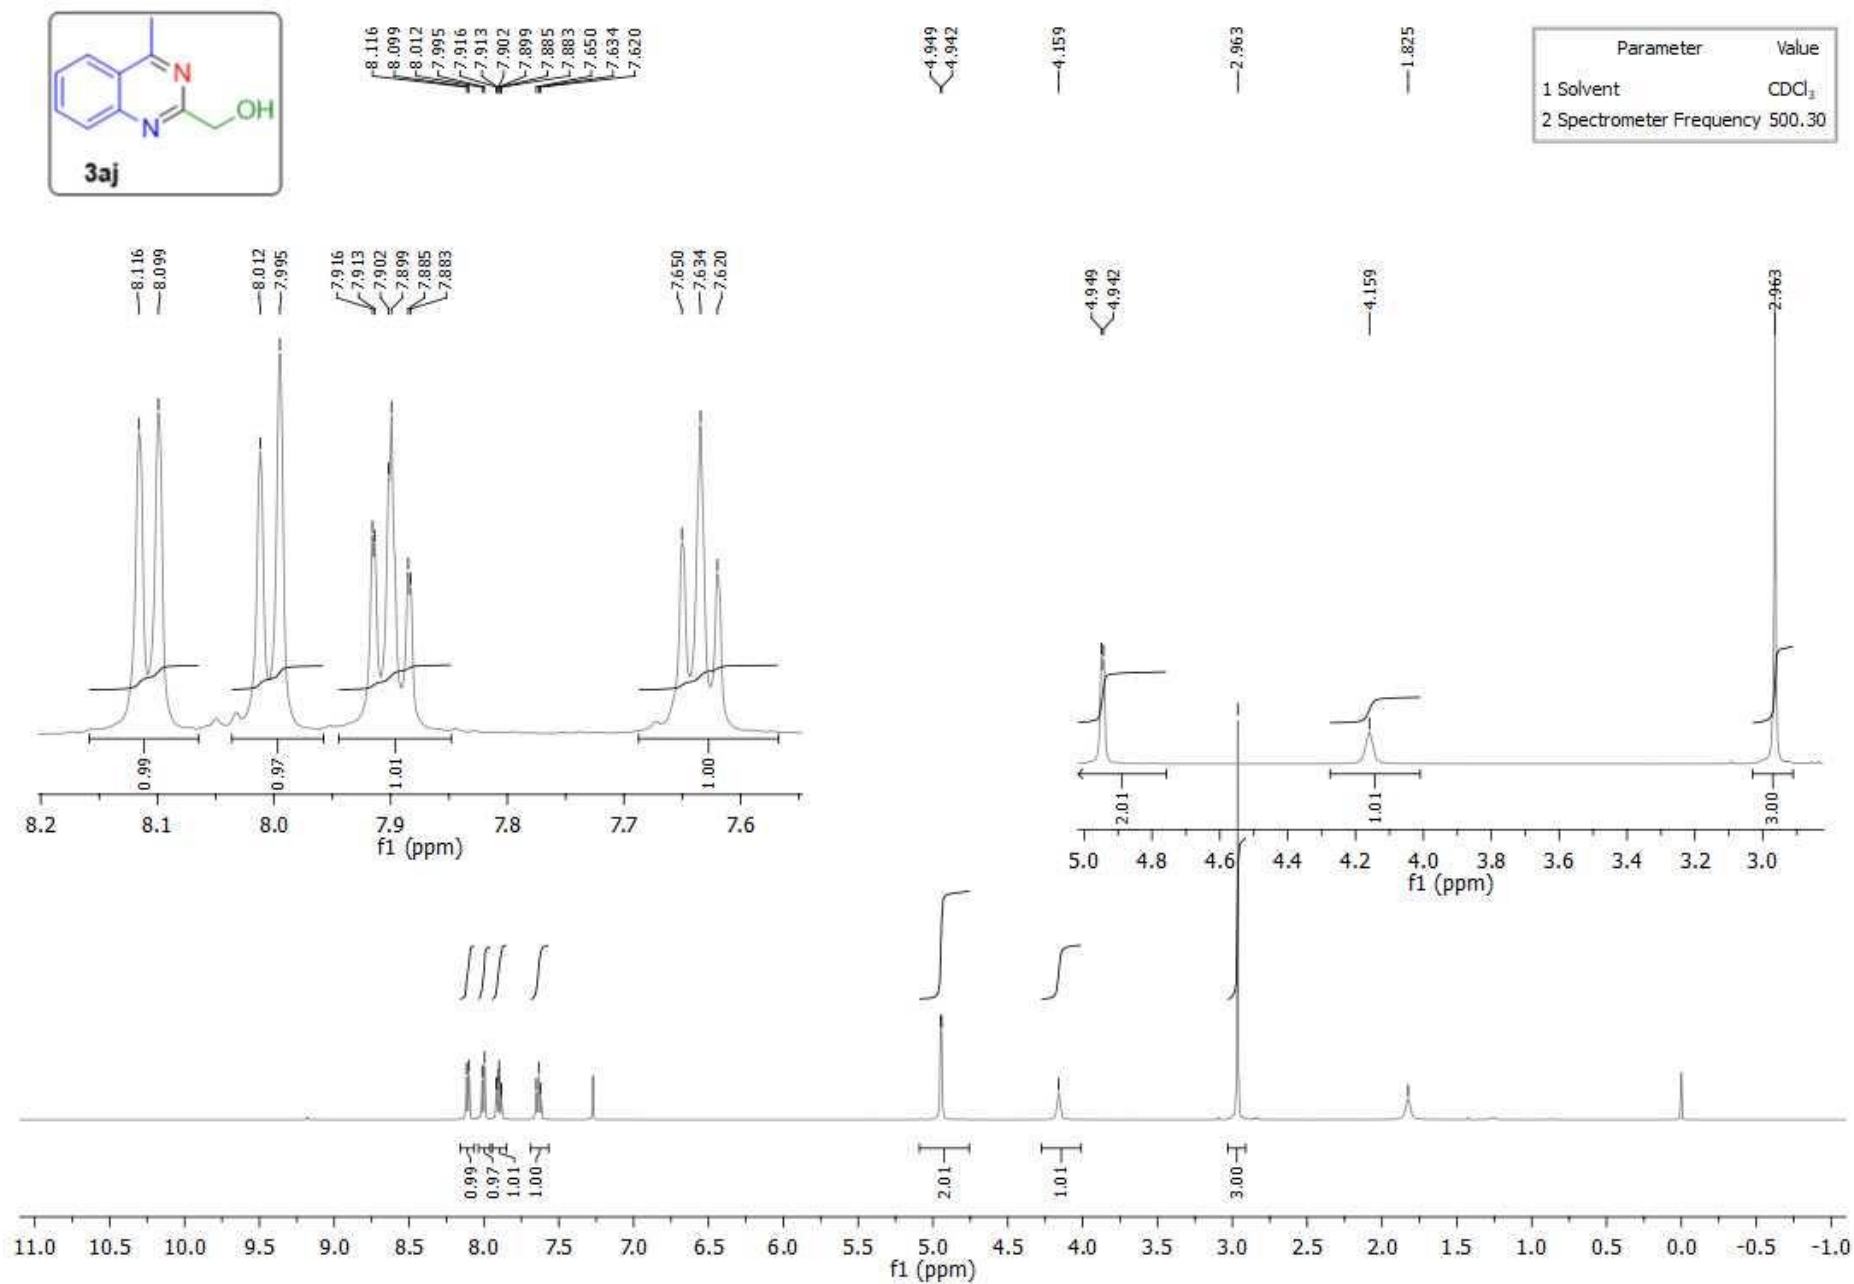

**Figure S52.** <sup>1</sup>H NMR Spectrum of (4-Methylquinazolin-2-yl)methanol (**3aj**)

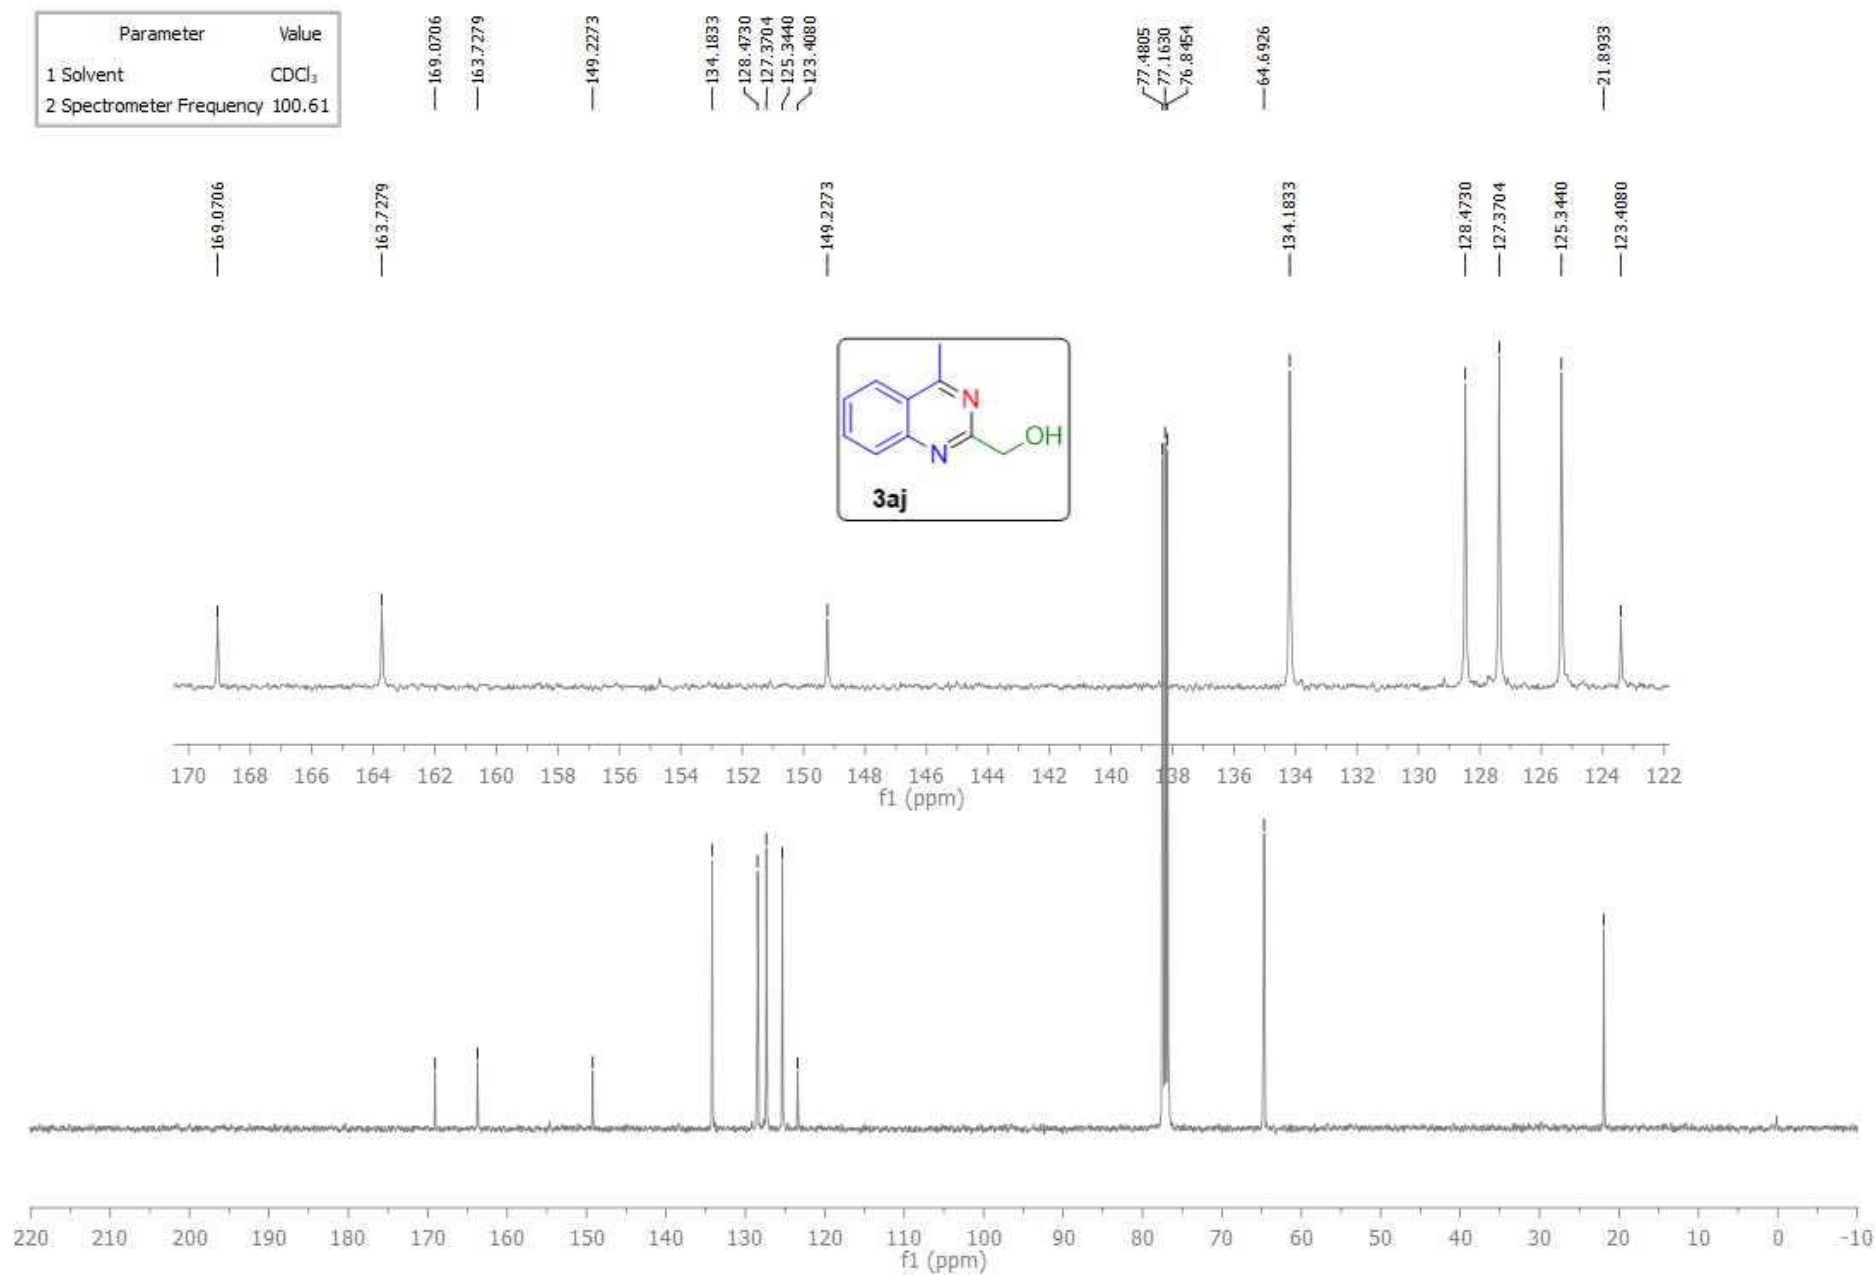

**Figure S53.** <sup>13</sup>C NMR Spectrum of (4-Methylquinazolin-2-yl)methanol (**3aj**)

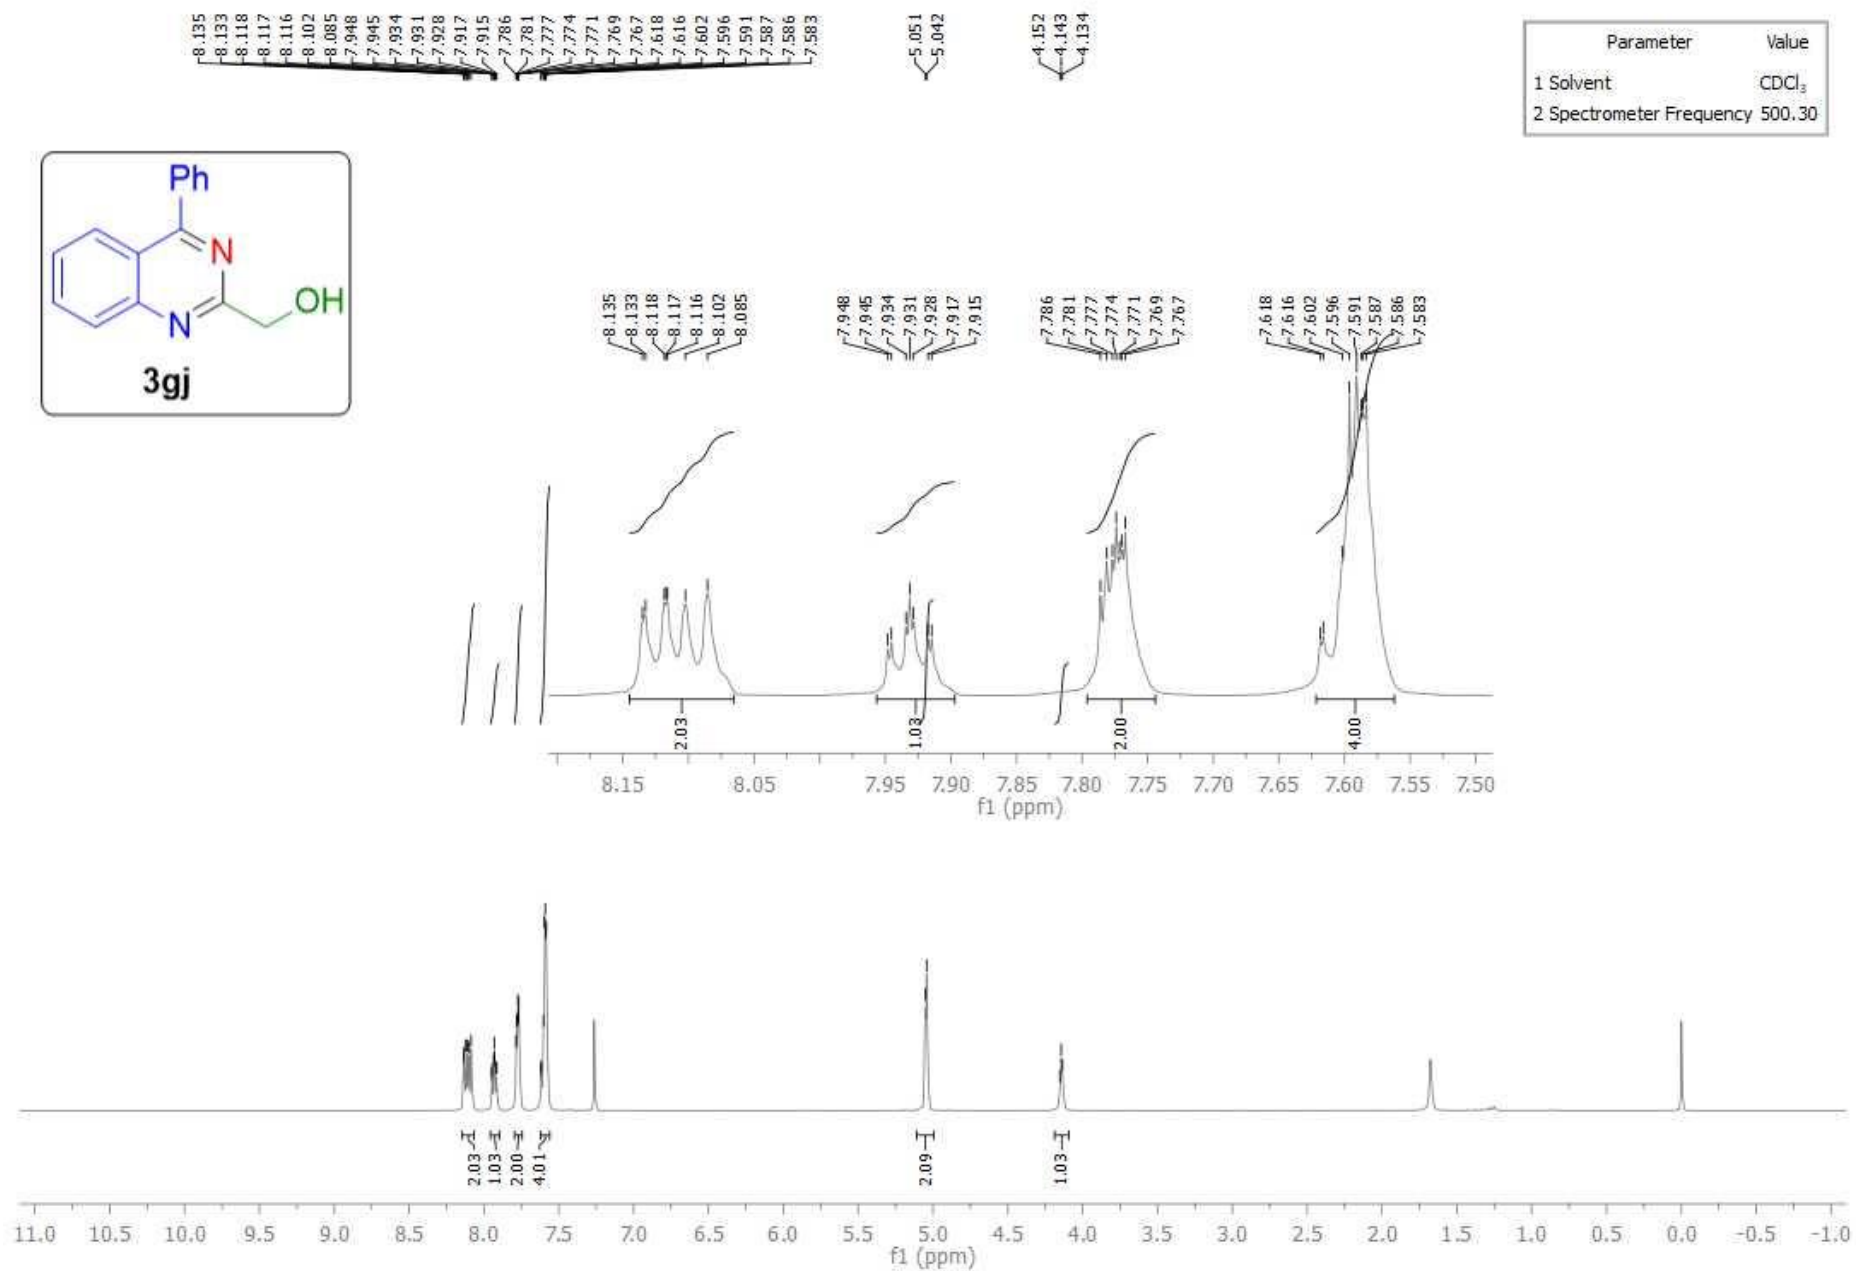

**Figure S54.** <sup>1</sup>H NMR Spectrum of (4-Phenylquinazolin-2-yl)methanol (**3gj**)

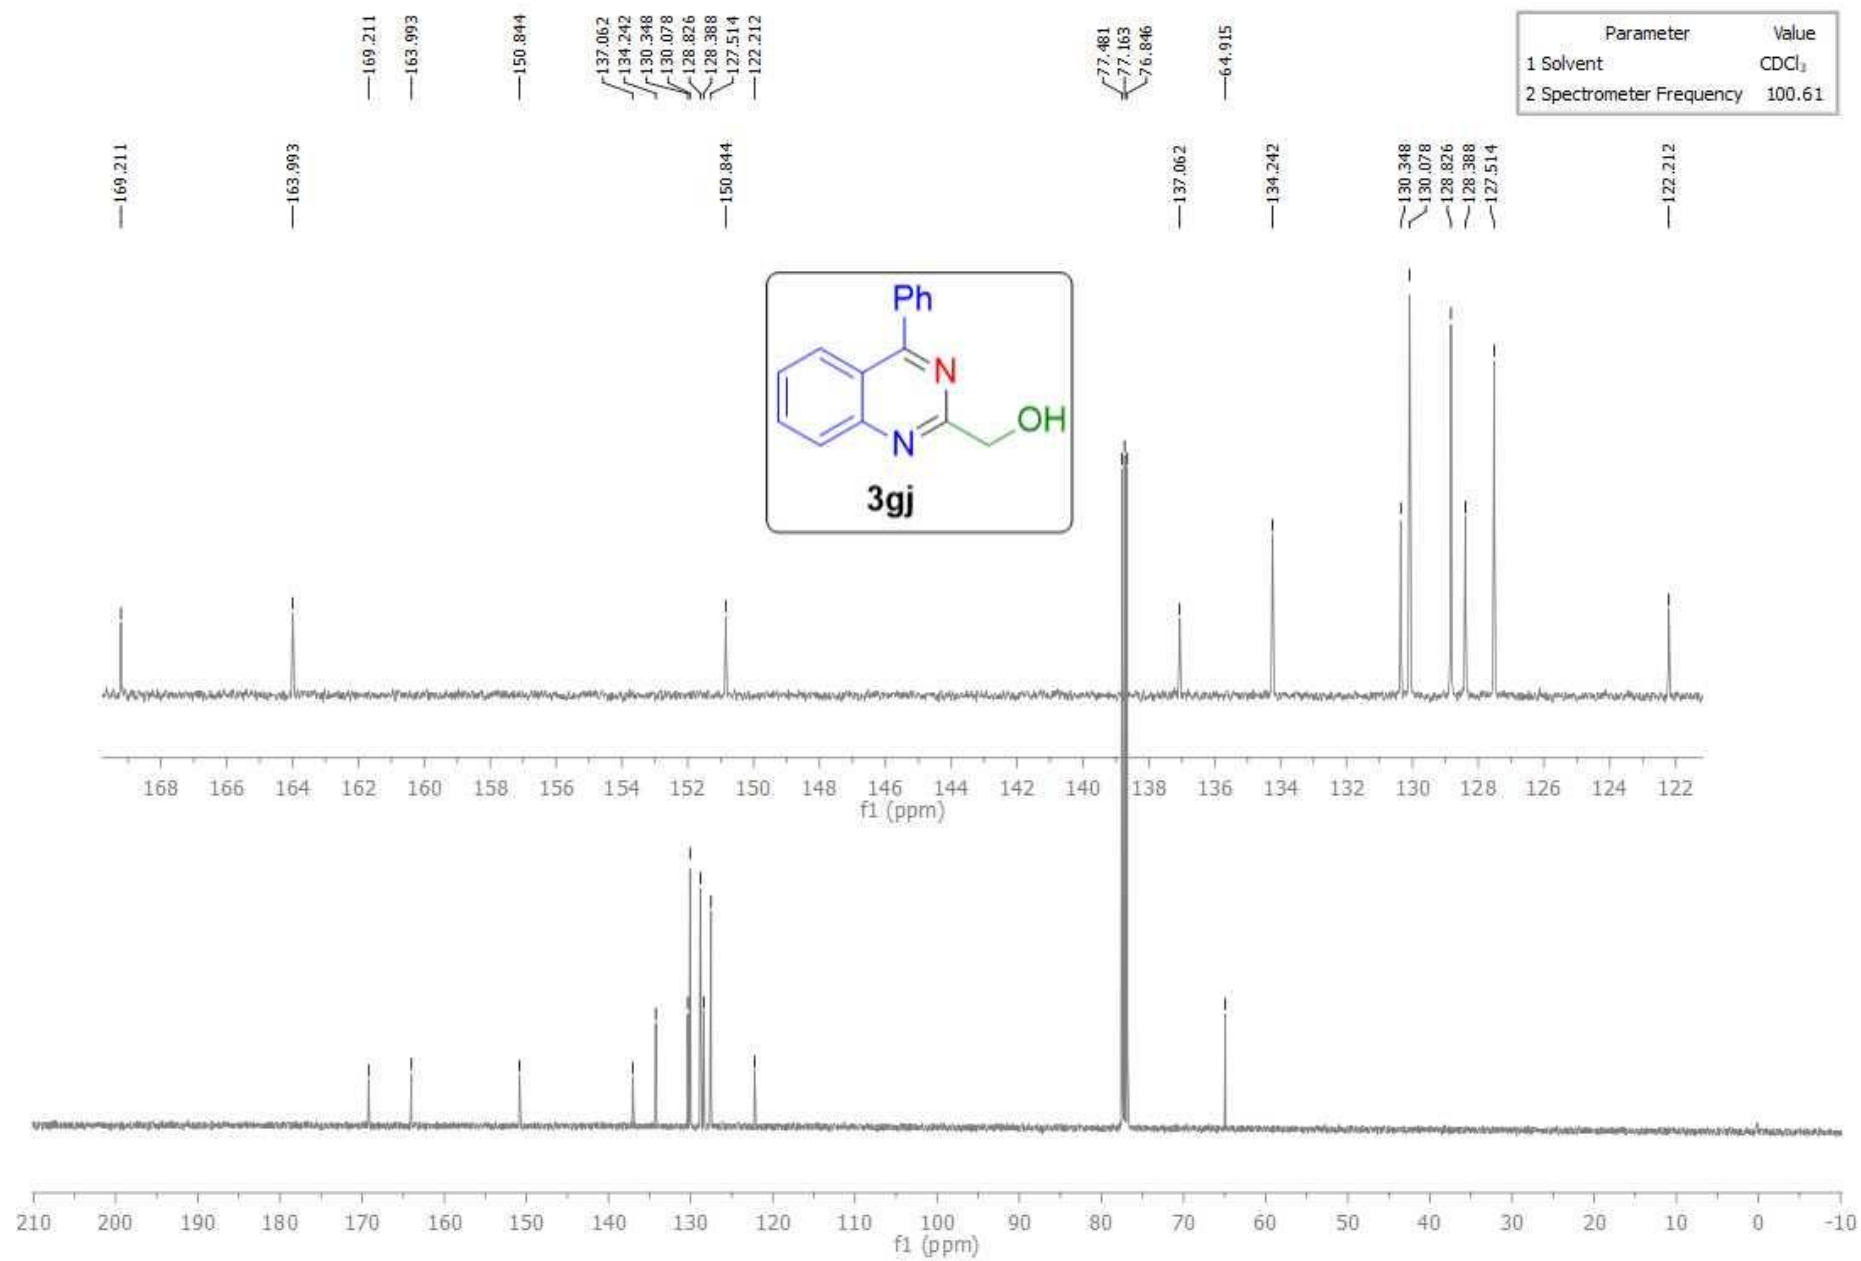

**Figure S55.** <sup>13</sup>C NMR Spectrum of (4-Phenylquinazolin-2-yl)methanol (**3gj**)

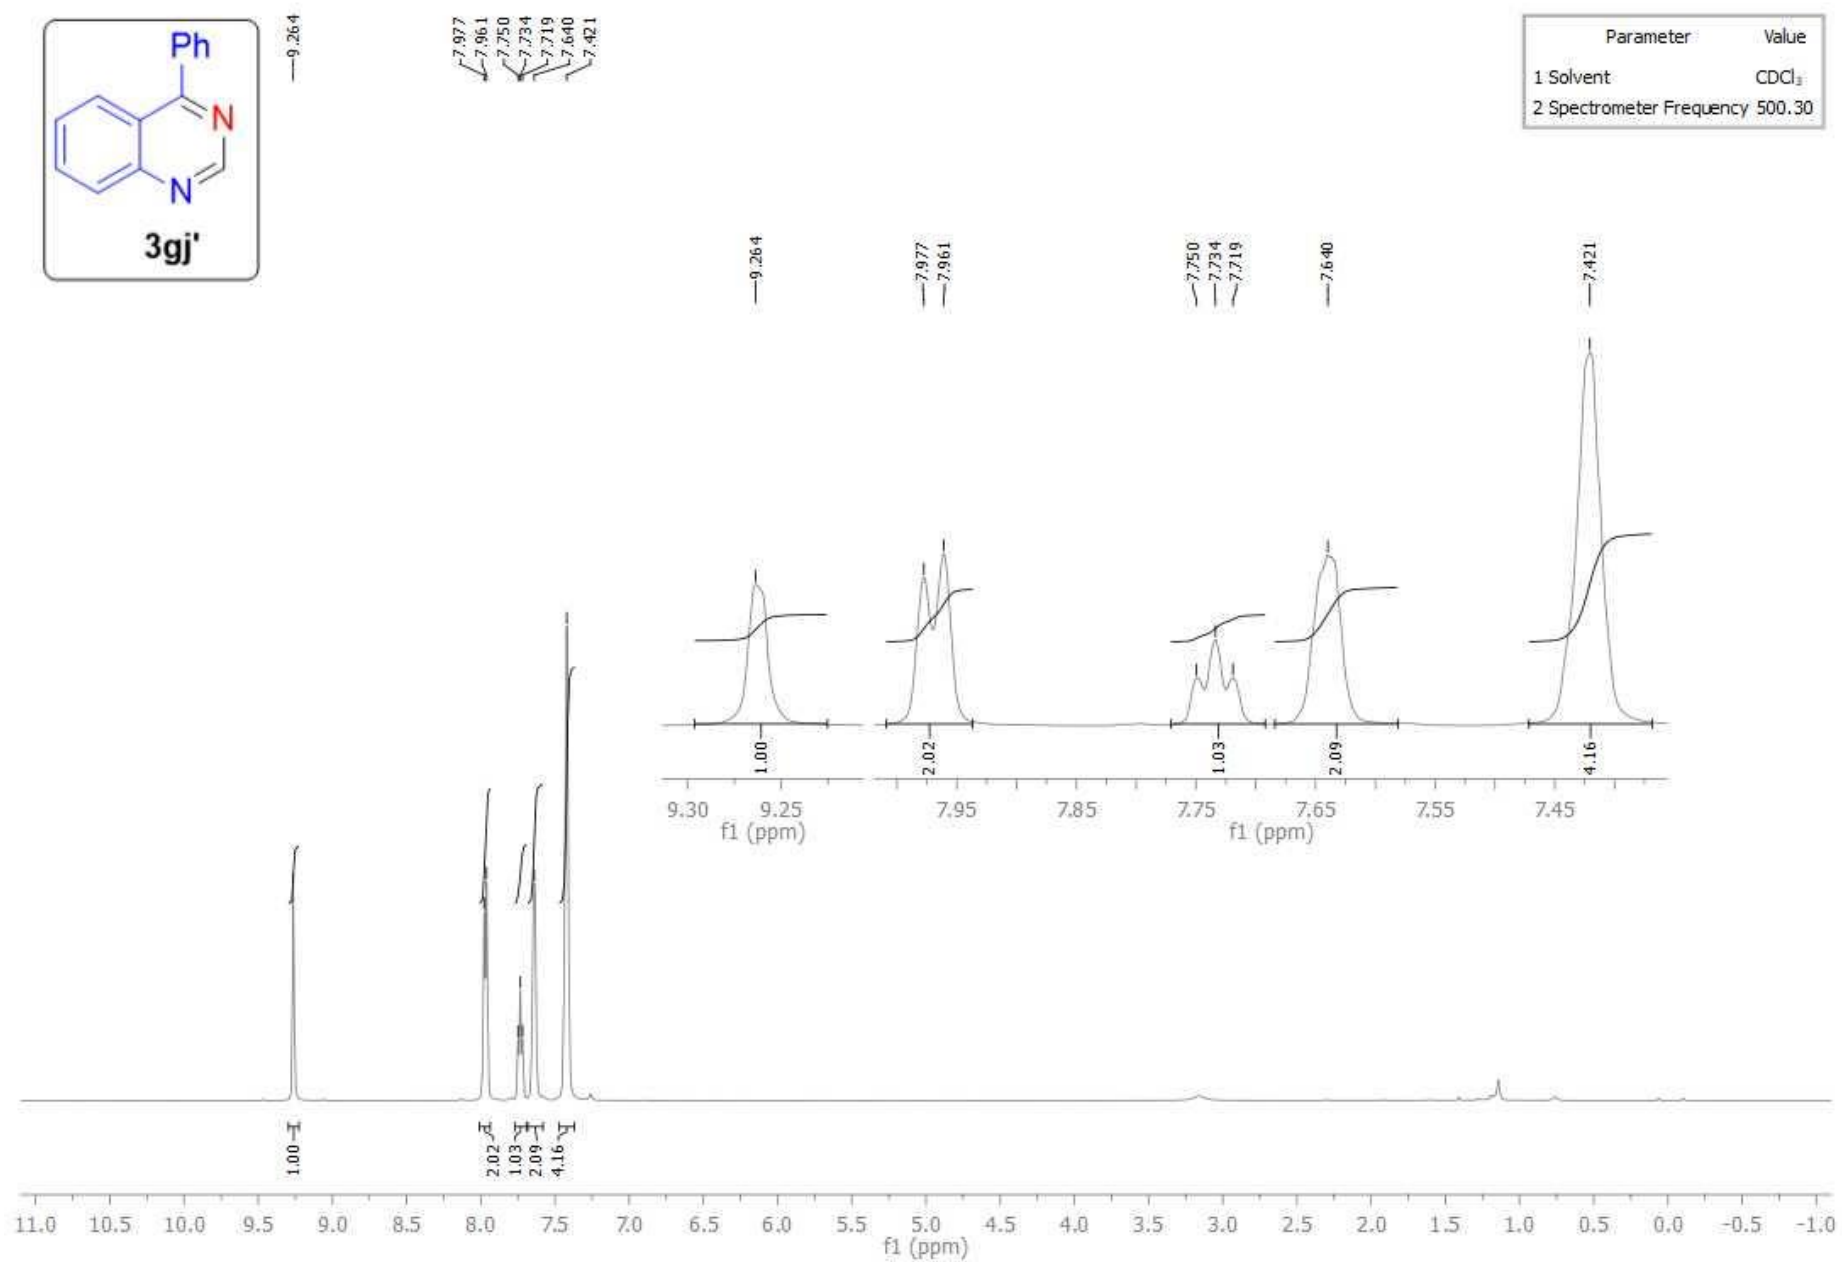

**Figure S56.** <sup>1</sup>H NMR Spectrum of 4-Phenylquinazoline (**3gj'**)

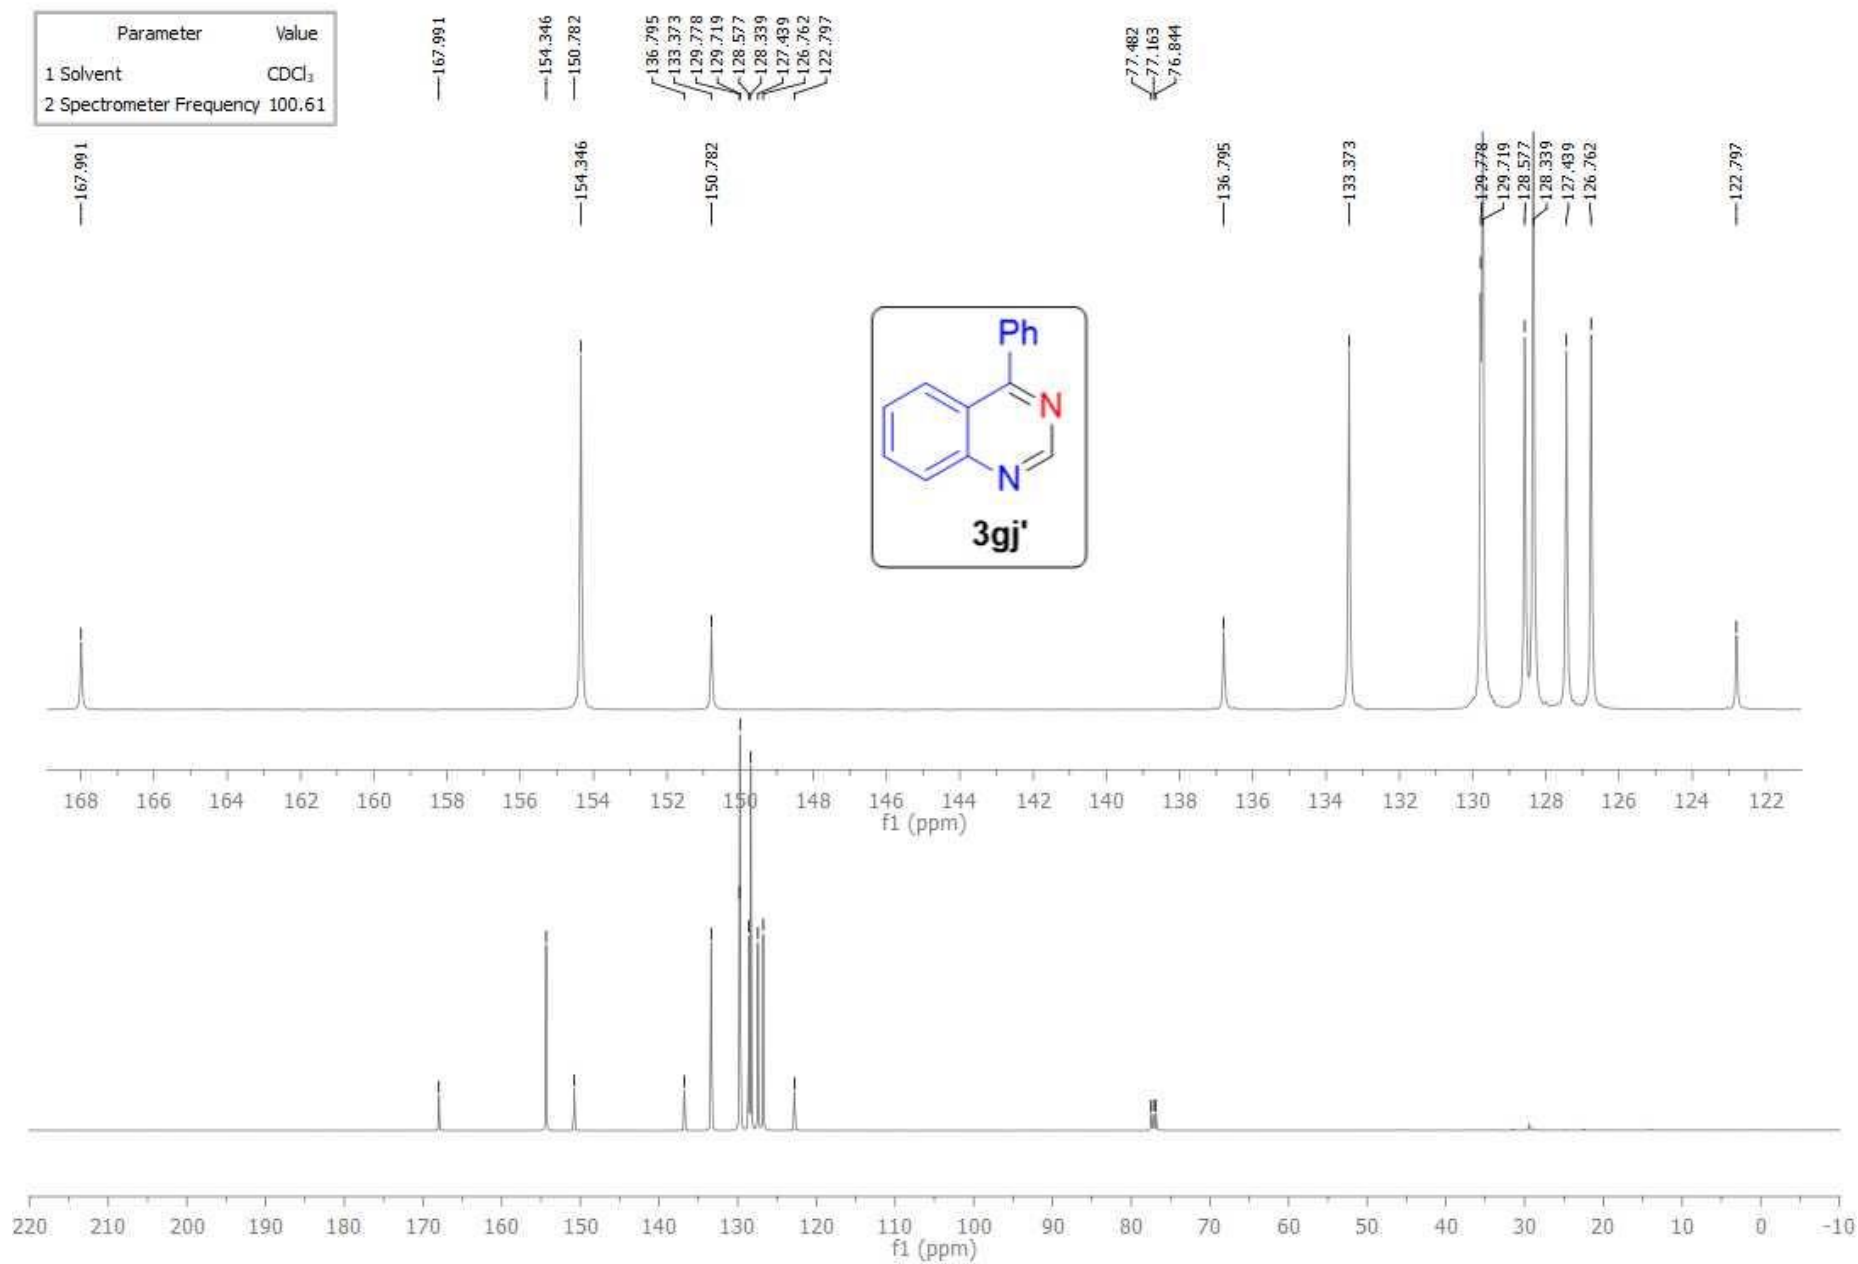

**Figure S57.** <sup>13</sup>C NMR Spectrum of 4-Phenylquinazoline (**3gj'**)
